# Supplementary material for: Manx shearwater (Puffinus puffinus) rafting behaviour revealed by GPS tracking and behavioural observations
Source: PeerJ. 2019 Oct 21;7:e7863. doi: 10.7717/peerj.7863 (PMC6812691; doi:10.7717/peerj.7863)
Supplement: Data S1 [file peerj-07-7863-s003.csv]

date	Start	end	location	lat	long	count	bearing	t_height	wind_speed	wind_dir	distance_from_shore
05/08/2016	20:45	21:05	SHD	51.71589713	-5.310278	500	180	6.61	4.756	230.4	1664.291803
05/08/2016	20:45	21:05	SHD	51.73072847	-5.323294765	150	253	6.61	4.756	230.4	890.179815
05/08/2016	20:45	21:05	SHD	51.73392941	-5.327287896	450	274	6.61	4.756	230.4	1017.988836
05/08/2016	20:45	21:05	SHD	51.73428475	-5.335527263	150	274	6.61	4.756	230.4	1575.957431
05/08/2016	20:45	21:05	SHD	51.7346472	-5.326987864	200	278	6.61	4.756	230.4	986.6827584
08/08/2016	19:30	19:50	SHD	51.72968562	-5.328797748	650	253	4.8	5.46	294.4	1286.41179
08/08/2016	19:30	19:50	SHD	51.71910507	-5.30502769	150	167	4.8	5.46	294.4	1190.649922
08/08/2016	19:30	19:50	SHD	51.72306602	-5.323516678	800	219	4.8	5.46	294.4	1395.942227
08/08/2016	18:45	19:13	GSN	51.75434743	-5.29165683	500	29	4.03	5.615	301.6	1246.41032
08/08/2016	18:45	19:13	GSN	51.75086001	-5.308856153	700	321	4.03	5.615	301.6	864.2985936
08/08/2016	18:45	19:13	GSN	51.74276795	-5.320063219	500	262	4.03	5.615	301.6	636.4089889
08/08/2016	18:45	19:13	GSN	51.75626646	-5.301498568	100	357	4.03	5.615	301.6	1293.903553
08/08/2016	18:45	19:13	GSN	51.75279063	-5.298371686	750	9	4.03	5.615	301.6	905.7597696
08/08/2016	18:45	19:13	GSN	51.7512071	-5.287063712	15	51	4.03	5.615	301.6	1005.480429
10/08/2016	20:00	20:26	SHD	51.74005575	-5.324985069	170	307	3.76	4.696	297.3	845.8760882
10/08/2016	20:00	20:26	SHD	51.7264825	-5.3306507	230	242	3.76	4.696	297.3	1537.925366
10/08/2016	20:00	20:26	SHD	51.72076031	-5.308874521	30	176	3.76	4.696	297.3	1152.258789
10/08/2016	20:00	20:26	SHD	51.73355253	-5.326910015	270	272	3.76	4.696	297.3	1000.659422
10/08/2016	20:43	21:10	GSN	51.75315841	-5.287414019	640	43	4.3	5.331	279	1196.614459
10/08/2016	20:43	21:10	GSN	51.75321369	-5.291329255	210	33	4.3	5.331	279	1126.096027
10/08/2016	20:43	21:10	GSN	51.74721653	-5.318287949	140	284	4.3	5.331	279	943.6527667
10/08/2016	20:43	21:10	GSN	51.75095024	-5.309596957	220	319	4.3	5.331	279	902.6430341
10/08/2016	20:43	21:10	GSN	51.75343417	-5.296073781	2200	17	4.3	5.331	279	1020.725543
11/08/2016	19:37	20:18	SHD	51.72013491	-5.299537636	20	153	2.99	7.842	256.6	1006.19234
11/08/2016	19:37	20:18	SHD	51.72100253	-5.291275814	90	136	2.99	7.842	256.6	829.0948717
11/08/2016	19:37	20:18	SHD	51.74149282	-5.323221525	750	316	2.99	7.842	256.6	774.3339233
11/08/2016	19:37	20:18	SHD	51.72022938	-5.303879912	5	163	2.99	7.842	256.6	1046.508281
11/08/2016	19:37	20:18	SHD	51.72903838	-5.326080121	1100	247	2.99	7.842	256.6	1132.612943
11/08/2016	18:55	19:20	GSN	51.75089594	-5.292680377	55	37	2.64	7.473	245.5	856.4135764
11/08/2016	18:55	19:20	GSN	51.7523941	-5.3005	250	0	2.64	7.473	245.5	859.0922321
11/08/2016	18:55	19:20	GSN	51.7505634	-5.299117168	110	8	2.64	7.473	245.5	654.775421
14/08/2016	19:00	19:20	SHD	51.72392117	-5.31999884	60	213	3.36	5.517	39.75	1177.310581
14/08/2016	19:00	19:20	SHD	51.71898692	-5.315995645	120	194	3.36	5.517	39.75	1624.146151
14/08/2016	19:43	20:12	GSN	51.75548246	-5.312498118	60	326	2.91	4.95	41.22	1431.676701
14/08/2016	19:43	20:12	GSN	51.75482342	-5.312650022	10	324	2.91	4.95	41.22	1375.533595
14/08/2016	19:43	20:12	GSN	51.75234771	-5.311955766	110	318	2.91	4.95	41.22	1125.309703
14/08/2016	19:43	20:12	GSN	51.75620966	-5.29359827	30	20	2.91	4.95	41.22	1439.785343
14/08/2016	19:43	20:12	GSN	51.75827803	-5.3005	20	0	2.91	4.95	41.22	1512.542516
15/08/2016	20:40	21:00	SHD	51.7376549	-5.328112846	150	292	2.91	4.95	41.22	1043.765288
15/08/2016	20:40	21:00	SHD	51.73971574	-5.328523782	120	300	2.59	4.977	143.7	1083.556991
15/08/2016	20:40	21:00	SHD	51.73145916	-5.330189404	40	262	2.59	4.977	143.7	1284.195838
15/08/2016	19:45	20:20	GSN	51.7408356	-5.319699993	80	253	3.3	6.029	134.3	521.1070628
15/08/2016	19:45	20:20	GSN	51.75753317	-5.316987166	160	322	3.3	6.029	134.3	1793.520052
15/08/2016	19:45	20:20	GSN	51.75249421	-5.306820511	70	334	3.3	6.029	134.3	957.2466085
15/08/2016	19:45	20:20	GSN	51.75315621	-5.30560594	190	340	3.3	6.029	134.3	999.6940475
15/08/2016	19:45	20:20	GSN	51.75344837	-5.305492919	30	341	3.3	6.029	134.3	1028.915262
15/08/2016	19:45	20:20	GSN	51.75210406	-5.295010969	80	24	3.3	6.029	134.3	881.6141389
16/08/2016	19:50	20:50	SHD	51.73767936	-5.327346292	100	293	4.08	8.63	134.9	990.9530993
16/08/2016	19:50	20:50	SHD	51.73356207	-5.327354052	70	272	4.08	8.63	134.9	1030.300573
16/08/2016	19:50	20:50	SHD	51.72619435	-5.327675771	700	237	4.08	8.63	134.9	1376.384753
16/08/2016	19:50	20:50	SHD	51.72817597	-5.323241318	60	238	4.08	8.63	134.9	1000.596521
16/08/2016	19:50	20:50	SHD	51.72821147	-5.322663406	150	237	4.08	8.63	134.9	964.7115834
16/08/2016	19:50	20:50	SHD	51.72753111	-5.320081439	1250	227	4.08	8.63	134.9	869.7694673
16/08/2016	19:50	20:50	SHD	51.72452737	-5.322439315	230	221	4.08	8.63	134.9	1223.532946
16/08/2016	19:50	20:50	SHD	51.72687311	-5.314821355	160	204	4.08	8.63	134.9	719.9987785
16/08/2016	19:50	20:50	SHD	51.7265702	-5.314817122	40	203	4.08	8.63	134.9	751.139686
16/08/2016	19:50	20:50	SHD	51.72224043	-5.312136455	1000	186	4.08	8.63	134.9	1183.780224
16/08/2016	19:50	20:50	SHD	51.72177432	-5.312215518	70	186	4.08	8.63	134.9	1222.122466
16/08/2016	19:50	20:50	SHD	51.71733071	-5.309383858	50	178	4.08	8.63	134.9	1494.622411
16/08/2016	19:50	20:50	SHD	51.71823242	-5.304256813	130	166	4.08	8.63	134.9	1266.186547
16/08/2016	18:55	19:28	GSN	51.74280432	-5.319646048	110	262	5.19	8.38	131.9	615.2550104
16/08/2016	18:55	19:28	GSN	51.75333921	-5.31053021	230	325	5.19	8.38	131.9	1157.750681
16/08/2016	18:55	19:28	GSN	51.75657873	-5.299817005	50	2	5.19	8.38	131.9	1322.558562
16/08/2016	18:55	19:28	GSN	51.75641975	-5.294228469	150	18	5.19	8.38	131.9	1462.039789
17/08/2016	19:05	19:25	NHV	51.74458311	-5.276671211	1100	28	5.82	3.19	43.8	557.6245971
17/08/2016	19:05	19:25	NHV	51.74245952	-5.27552508	500	42	5.82	3.19	43.8	484.7108571
17/08/2016	19:05	19:25	NHV	51.74202553	-5.274013385	200	50	5.82	3.19	43.8	456.5663617
17/08/2016	19:05	19:25	NHV	51.74117463	-5.271530457	350	62	5.82	3.19	43.8	481.2220748
17/08/2016	19:05	19:25	NHV	51.74058681	-5.270325205	100	68	5.82	3.19	43.8	509.8765484
17/08/2016	19:30	19:50	SHV	51.72749138	-5.28010563	60	163	5.44	2.381	15.37	492.141007
17/08/2016	19:30	19:50	SHV	51.72774386	-5.280484997	110	164	5.44	2.381	15.37	465.1310253
17/08/2016	19:30	19:50	SHV	51.72946837	-5.279373464	290	155	5.44	2.381	15.37	275.9031735
17/08/2016	19:30	19:50	SHV	51.72937373	-5.278104297	100	150	5.44	2.381	15.37	312.0894023
17/08/2016	19:30	19:50	SHV	51.72801385	-5.281573204	100	168	5.44	2.381	15.37	446.9820779
17/08/2016	19:30	19:50	SHV	51.72683402	-5.273516603	1400	144	5.44	2.381	15.37	721.1989949
17/08/2016	20:15	20:45	SHD	51.73954528	-5.328046723	760	300	4.37	3.977	48.66	1049.369969
17/08/2016	20:15	20:45	SHD	51.73815682	-5.329163928	160	293	4.37	3.977	48.66	1116.868492
17/08/2016	20:15	20:45	SHD	51.73160613	-5.31984384	2000	255	4.37	3.977	48.66	635.8623027
17/08/2016	20:15	20:45	SHD	51.73005473	-5.319055996	1500	240	4.37	3.977	48.66	646.3564337
17/08/2016	20:15	20:45	SHD	51.72690862	-5.316618604	50	212	4.37	3.977	48.66	772.297379
17/08/2016	20:15	20:45	SHD	51.72510916	-5.307976595	470	170	4.37	3.977	48.66	760.7989789
17/08/2016	20:15	20:45	SHD	51.72600273	-5.307383408	120	166	4.37	3.977	48.66	671.4064438
17/08/2016	20:15	20:45	SHD	51.72386759	-5.305960825	300	164	4.37	3.977	48.66	755.723431
17/08/2016	20:15	20:45	SHD	51.72304383	-5.304954115	250	162	4.37	3.977	48.66	791.3651174
17/08/2016	20:15	20:45	SHD	51.72188007	-5.298866181	200	148	4.37	3.977	48.66	808.4124744
17/08/2016	20:15	20:45	SHD	51.72529385	-5.30167576	500	146	4.37	3.977	48.66	465.5204624
17/08/2016	20:15	20:45	SHD	51.72055346	-5.296515859	300	146	4.37	3.977	48.66	896.4435839
17/08/2016	21:00	21:10	GSN	51.7437454	-5.317254238	450	266	3.46	7.029	39.94	573.2806234
17/08/2016	21:00	21:10	GSN	51.74647702	-5.318878882	140	280	3.46	7.029	39.94	889.6526841
17/08/2016	21:00	21:10	GSN	51.74677083	-5.317977911	500	282	3.46	7.029	39.94	889.7282352
17/08/2016	21:00	21:10	GSN	51.7509434	-5.308095011	350	324	3.46	7.029	39.94	842.9976704
17/08/2016	21:00	21:10	GSN	51.75288055	-5.303886614	2500	346	3.46	7.029	39.94	943.5482083
17/08/2016	21:00	21:10	GSN	51.75172411	-5.29885363	1600	8	3.46	7.029	39.94	784.7531643
17/08/2016	21:00	21:10	GSN	51.75213141	-5.290117578	100	40	3.46	7.029	39.94	1029.203012
17/08/2016	21:00	21:10	GSN	51.74844605	-5.284608355	370	68	3.46	7.029	39.94	796.899117
18/08/2016	20:33	20:40	SHV	51.72462915	-5.289972754	460	197	5.2	2.508	180.7	440.9658719
18/08/2016	19:35	20:04	SHD	51.72574775	-5.309437396	530	176	6.3	2.64	174	808.3796316
18/08/2016	19:35	20:04	SHD	51.7256943	-5.308576407	430	172	6.3	2.64	174	759.5116043
18/08/2016	19:35	20:04	SHD	51.73380447	-5.321554686	520	275	6.3	2.64	174	636.8338794
18/08/2016	19:35	20:04	SHD	51.7215207	-5.304517007	1500	163	6.3	2.64	174	928.2819333
18/08/2016	18:50	19:13	GSN	51.75282092	-5.290336621	230	37	7.01	2.81	176	1098.833393
18/08/2016	18:50	19:13	GSN	51.74929324	-5.288035761	100	58	7.01	2.81	176	783.0463304
18/08/2016	18:50	19:13	GSN	51.74447068	-5.318135191	270	270	7.01	2.81	176	674.1615769
19/08/2016	20:42	20:52	NHV	51.74204151	-5.273331689	350	52	6.02	15.32	208.7	479.2230047
19/08/2016	18:50	19:20	SHD	51.7318848	-5.316782894	550	252	7.42	17.6	202	423.695303
19/08/2016	18:50	19:20	SHD	51.72127473	-5.306885389	370	170	7.42	17.6	202	1028.541486
19/08/2016	18:50	19:20	SHD	51.72655987	-5.315046472	2900	204	7.42	17.6	202	758.1108606
19/08/2016	18:50	19:20	SHD	51.73621386	-5.325290731	300	288	7.42	17.6	202	868.5935578
19/08/2016	18:50	19:20	SHD	51.73960018	-5.322608283	1200	310	7.42	17.6	202	676.912889
19/08/2016	18:50	19:20	SHD	51.74068209	-5.320425611	350	320	7.42	17.6	202	565.2495586
19/08/2016	18:50	19:20	SHD	51.74000053	-5.323379042	2000	310	7.42	17.6	202	735.7143103
19/08/2016	19:20	20:10	GSN	51.74867614	-5.307532216	830	314	7.34	17.58	201.8	616.9149315
19/08/2016	19:20	20:10	GSN	51.75107171	-5.299567325	470	5	7.34	17.58	201.8	710.2084356
19/08/2016	19:20	20:10	GSN	51.74538624	-5.286438301	130	84	7.34	17.58	201.8	435.5315367
19/08/2016	19:20	20:10	GSN	51.74514153	-5.285012556	50	86	7.34	17.58	201.8	443.6429083
21/08/2016	18:50	19:00	NHV	51.7448692	-5.276425483	140	28	6.41	10.84	229.4	592.6890718
21/08/2016	20:15	20:40	SHD	51.73582494	-5.321952752	1130	290	7.46	10.98	223.5	636.1806623
21/08/2016	20:15	20:40	SHD	51.74139674	-5.323997079	15	314	7.46	10.98	223.5	823.0046466
21/08/2016	20:15	20:40	SHD	51.73245558	-5.323891393	1510	265	7.46	10.98	223.5	840.5794135
21/08/2016	20:15	20:40	SHD	51.73048038	-5.316308029	240	234	7.46	10.98	223.5	460.4578909
21/08/2016	20:15	20:40	SHD	51.7293315	-5.314977126	1100	217	7.46	10.98	223.5	485.0027736
21/08/2016	20:15	20:40	SHD	51.72678255	-5.312103133	2700	190	7.46	10.98	223.5	681.2916616
21/08/2016	19:30	19:54	GSN	51.74918548	-5.308384315	50	314	7.14	10.75	225.3	698.2193953
21/08/2016	19:30	19:54	GSN	51.75061962	-5.303535973	30	343	NA	10.75	225.3	691.8626261
21/08/2016	19:30	19:54	GSN	51.7448671	-5.282160489	580	88	NA	10.75	225.3	436.8597192
21/08/2016	19:30	19:54	GSN	51.74281202	-5.319557679	670	262	NA	10.75	225.3	610.8564789
21/08/2016	19:30	19:54	GSN	51.74301822	-5.319601608	440	263	NA	10.75	225.3	627.1397482
23/08/2016	20:15	20:22	NHV	51.74188492	-5.272598943	20	55	5.93	4.985	343.3	491.41939
23/08/2016	19:20	20:47	SHD	51.72189383	-5.307061561	100	170	4.63	5.944	346.7	977.3272464
23/08/2016	19:20	20:47	SHD	51.72107009	-5.313377695	250	189	4.63	5.944	346.7	1334.034935
23/08/2016	19:20	20:47	SHD	51.7228445	-5.310278	30	180	4.63	5.944	346.7	1043.321555
23/08/2016	19:20	20:47	SHD	51.72576818	-5.312391841	20	190	4.63	5.944	346.7	760.4743606
23/08/2016	19:20	20:47	SHD	51.72852416	-5.317066257	60	222	4.63	5.944	346.7	645.3682092
23/08/2016	18:35	18:55	GSN	51.7484173	-5.310699237	150	302	3.66	6.025	357.2	761.6620633
23/08/2016	18:35	18:55	GSN	51.75284859	-5.308312514	210	330	3.66	6.025	357.2	1035.405922
23/08/2016	18:35	18:55	GSN	51.75881176	-5.298880004	30	4	3.66	6.025	357.2	1571.777036
24/08/2016	20:23	20:37	SHV	51.72388249	-5.293082433	120	204	4.64	6.6	5.895	517.8191656
24/08/2016	20:23	20:37	SHV	51.72137441	-5.29589163	360	206	4.64	6.6	5.895	839.5924173
24/08/2016	20:23	20:37	SHV	51.72009663	-5.293203222	270	199	4.64	6.6	5.895	935.4827727
24/08/2016	19:25	19:53	GSN	51.74213764	-5.318226122	120	258	3.61	6.827	355.1	492.5912097
24/08/2016	19:25	19:53	GSN	51.74918508	-5.316111832	30	296	3.61	6.827	355.1	1042.517075
24/08/2016	19:25	19:53	GSN	51.75368384	-5.301019648	80	358	3.61	6.827	355.1	1004.897915
24/08/2016	19:25	19:53	GSN	51.75507067	-5.291395998	100	28	3.61	6.827	355.1	1328.647638
24/08/2016	19:25	19:53	GSN	51.75463123	-5.291024446	30	30	3.61	6.827	355.1	1284.863773
25/08/2016	19:30	20:06	SHD	51.71988159	-5.307257965	110	172	2.69	4.325	301.3	1175.472464
25/08/2016	19:30	20:06	SHD	51.7196573	-5.307981406	40	174	2.69	4.325	301.3	1221.673609
25/08/2016	19:30	20:06	SHD	51.72619392	-5.323744549	80	230	2.69	4.325	301.3	1157.479054
25/08/2016	19:30	20:06	SHD	51.72846193	-5.321187748	40	235	2.69	4.325	301.3	864.5277506
25/08/2016	19:30	20:06	SHD	51.72814853	-5.326261649	270	243	2.69	4.325	301.3	1184.527073
25/08/2016	19:30	20:06	SHD	51.72758007	-5.325973479	50	240	2.69	4.325	301.3	1196.475301
25/08/2016	19:30	20:06	SHD	51.72949304	-5.32252711	100	244	2.69	4.325	301.3	887.9557547
25/08/2016	19:30	20:06	SHD	51.73305145	-5.323396896	60	269	2.69	4.325	301.3	784.0327755
25/08/2016	19:30	20:06	SHD	51.73352063	-5.325425819	90	272	2.69	4.325	301.3	902.0470444
25/08/2016	19:30	20:06	SHD	51.7377122	-5.32666944	70	294	2.69	4.325	301.3	944.3150292
25/08/2016	19:30	20:06	SHD	51.74013843	-5.330514808	110	299	2.69	4.325	301.3	1224.597231
25/08/2016	19:30	20:06	SHD	51.73154525	-5.329202252	100	262	2.69	4.325	301.3	1217.270868
25/08/2016	19:30	20:06	SHD	51.72054009	-5.309564706	470	178	2.69	4.325	301.3	1200.203991
25/08/2016	20:20	20:45	GSN	51.75112497	-5.293784604	450	32	3.45	2.583	263.3	874.3967824
25/08/2016	20:20	20:45	GSN	51.75114056	-5.297613703	70	15	3.45	2.583	263.3	764.7567819
25/08/2016	20:20	20:45	GSN	51.7522409	-5.298736287	550	8	3.45	2.583	263.3	842.6593715
25/08/2016	20:20	20:45	GSN	51.75328018	-5.297475611	300	12	3.45	2.583	263.3	1002.058923
25/08/2016	20:20	20:45	GSN	51.7518229	-5.307355715	50	330	3.45	2.583	263.3	903.9901066
25/08/2016	20:20	20:45	GSN	51.7464411	-5.326439499	80	277	3.45	2.583	263.3	1232.481975
25/08/2016	20:20	20:45	GSN	51.74691722	-5.319091616	100	282	3.45	2.583	263.3	939.4450649
26/08/2016	20:20	20:33	SHV	51.72346869	-5.290935235	120	198	2.55	2.123	183.8	556.6827219
26/08/2016	20:20	20:33	SHV	51.72033229	-5.287449421	260	187	2.55	2.123	183.8	948.5831623
26/08/2016	20:20	20:33	SHV	51.72334395	-5.287951426	110	190	2.55	2.123	183.8	623.0308448
26/08/2016	19:23	20:48	SHD	51.72053184	-5.307405438	30	172	2.17	3.873	235.5	1117.752841
26/08/2016	19:23	20:48	SHD	51.74169715	-5.329182275	50	306	2.17	3.873	235.5	1178.412674
26/08/2016	19:23	20:48	SHD	51.72934565	-5.333452444	100	255	2.17	3.873	235.5	1605.882434
26/08/2016	19:23	20:48	SHD	51.72506984	-5.322507377	70	223	2.17	3.873	235.5	1181.699401
26/08/2016	18:30	19:02	GSN	51.75172049	-5.296695588	10	18	2.16	4.565	221.7	828.4113532
27/08/2016	20:00	20:30	SHD	51.71916021	-5.317203558	100	197	2.19	5.09	164.1	1671.987331
27/08/2016	20:00	20:30	SHD	51.73235792	-5.329547057	110	266	2.19	5.09	164.1	1210.204452
27/08/2016	20:00	20:30	SHD	51.73627318	-5.338507612	50	280	2.19	5.09	164.1	1777.236713
27/08/2016	20:00	20:30	SHD	51.73776478	-5.322563798	80	301	2.19	5.09	164.1	661.5815519
27/08/2016	20:00	20:30	SHD	51.73950997	-5.322434602	40	310	2.19	5.09	164.1	663.9414755
27/08/2016	20:00	20:30	SHD	51.73978442	-5.321299862	90	314	2.19	5.09	164.1	590.5485401
27/08/2016	19:15	19:40	GSN	51.7549535	-5.318036035	190	314	2.36	5.798	138.5	1620.670072
27/08/2016	19:15	19:40	GSN	51.75654183	-5.318685029	70	317	2.36	5.798	138.5	1780.682739
27/08/2016	19:15	19:40	GSN	51.75264864	-5.312393587	60	318	2.36	5.798	138.5	1170.293695
27/08/2016	19:15	19:40	GSN	51.75231199	-5.309701574	90	324	2.36	5.798	138.5	1030.740063
27/08/2016	19:15	19:40	GSN	51.75218664	-5.306849736	290	333	2.36	5.798	138.5	926.4102513
27/08/2016	19:15	19:40	GSN	51.75716922	-5.309633061	20	336	2.36	5.798	138.5	1511.827862
27/08/2016	19:15	19:40	GSN	51.75181462	-5.293088347	70	32	2.36	5.798	138.5	954.4832755
28/08/2016	20:10	20:15	SHV	51.72197244	-5.292607533	350	200	2.38	5.9	309.8	723.7887062
28/08/2016	19:30	19:50	SHD	51.72522498	-5.300227292	240	142	2.83	5.631	316.3	444.4146281
28/08/2016	19:30	19:50	SHD	51.72091506	-5.306064949	110	168	2.83	5.631	316.3	1035.358134
28/08/2016	19:30	19:50	SHD	51.72427097	-5.318594362	1210	210	2.83	5.631	316.3	1094.309538
28/08/2016	19:30	19:50	SHD	51.72522446	-5.303437272	270	152	2.83	5.631	316.3	530.7059875
28/08/2016	18:28	19:10	GSN	51.75191791	-5.29635852	460	19	3.67	4.865	2.189	851.2684263
28/08/2016	18:28	19:10	GSN	51.75255792	-5.291009718	40	36	3.67	4.865	2.189	1059.300087
28/08/2016	18:28	19:10	GSN	51.75441109	-5.292668847	50	26	3.67	4.865	2.189	1244.637763
28/08/2016	18:28	19:10	GSN	51.75480725	-5.296645417	150	13	3.67	4.865	2.189	1171.628452
28/08/2016	18:28	19:10	GSN	51.75825609	-5.298159429	160	6	3.67	4.865	2.189	1512.638489
28/08/2016	18:28	19:10	GSN	51.75079914	-5.321460641	1700	296	3.67	4.865	2.189	1420.177997
28/08/2016	18:28	19:10	GSN	51.75351595	-5.293995304	340	24	3.67	4.865	2.189	1139.497761
28/08/2016	18:28	19:10	GSN	51.7519493	-5.305877712	410	336	3.67	4.865	2.189	877.5467149
29/08/2016	19:13	19:50	GSN	51.75410165	-5.306161939	40	340	4.01	4.821	235.3	1111.323647
29/08/2016	19:13	19:50	GSN	51.7529766	-5.287687986	110	43	4.01	4.821	235.3	1171.157493
31/08/2016	19:07	19:45	SHD	51.7241944	-5.309770656	820	178	5.93	4.59	260.8	920.6464393
31/08/2016	20:00	20:27	GSN	51.74755688	-5.286806802	310	70	4.95	3.802	266.8	676.6477305
31/08/2016	20:00	20:27	GSN	51.75020706	-5.29186101	90	43	4.95	3.802	266.8	791.4122845
31/08/2016	20:00	20:27	GSN	51.75112856	-5.296155709	110	22	4.95	3.802	266.8	764.5847606
31/08/2016	20:00	20:27	GSN	51.75481931	-5.304359083	180	347	4.95	3.802	266.8	1161.541471
31/08/2016	20:00	20:27	GSN	51.75297441	-5.310479219	270	324	4.95	3.802	266.8	1121.656999
01/09/2016	18:25	18:40	NHV	51.74296782	-5.278639082	120	25	6.92	9.73	212.1	333.9037824
01/09/2016	18:25	18:40	NHV	51.74195278	-5.277896914	420	34	6.92	9.73	212.1	312.2715315
01/09/2016	19:20	19:45	SHD	51.73670483	-5.323636794	400	293	6.5	9.16	209.9	745.003733
01/09/2016	19:20	19:45	SHD	51.73887902	-5.324416916	230	303	6.5	9.16	209.9	797.0192377
01/09/2016	19:20	19:45	SHD	51.72710348	-5.318528322	240	220	6.5	9.16	209.9	830.8518316
01/09/2016	20:05	20:22	GSN	51.74980165	-5.288203942	150	55	5.61	10.85	204.2	831.5202834
01/09/2016	20:05	20:22	GSN	51.75029397	-5.291418042	250	44	5.61	10.85	204.2	808.1557667
01/09/2016	20:05	20:22	GSN	51.75163503	-5.295348353	560	24	5.61	10.85	204.2	826.6029395
01/09/2016	20:05	20:22	GSN	51.75029254	-5.29288628	600	39	5.61	10.85	204.2	787.9988631
01/09/2016	20:05	20:22	GSN	51.75237478	-5.3005	440	0	5.61	10.85	204.2	856.9486585
01/09/2016	20:05	20:22	GSN	51.74788916	-5.286835934	500	68	5.61	10.85	204.2	711.0134326
01/09/2016	20:05	20:22	GSN	51.75267862	-5.301426995	300	356	5.61	10.85	204.2	896.995723
02/09/2016	20:10	20:15	NHV	51.74398998	-5.277869169	130	25	6.34	8.1	246.5	453.8520483
02/09/2016	19:19	19:50	SHD	51.74193023	-5.320529158	70	324	6.96	7.956	246.2	617.8450874
02/09/2016	19:19	19:50	SHD	51.72822501	-5.318299919	280	225	6.96	7.956	246.2	727.8844101
02/09/2016	19:19	19:50	SHD	51.72769814	-5.320851379	420	230	6.96	7.956	246.2	897.319263
02/09/2016	19:19	19:50	SHD	51.72328535	-5.316740534	130	202	6.96	7.956	246.2	1130.32855
02/09/2016	18:30	19:00	GSN	51.74566863	-5.286739033	90	82	6.97	7.175	246.6	462.0939448
02/09/2016	18:30	19:00	GSN	51.74854194	-5.285731624	100	66	6.97	7.175	246.6	805.1573847
04/09/2016	18:48	19:22	SHD	51.72445536	-5.309538672	50	177	6.31	5.51	201.6	890.5670702
04/09/2016	18:48	19:22	SHD	51.72388793	-5.310540229	70	181	6.31	5.51	201.6	983.51297
04/09/2016	18:48	19:22	SHD	51.72819094	-5.320615621	110	232	6.31	5.51	201.6	850.3825775
04/09/2016	18:48	19:22	SHD	51.73348373	-5.323709982	30	272	6.31	5.51	201.6	789.2052957
04/09/2016	18:48	19:22	SHD	51.74007647	-5.321011978	40	316	6.31	5.51	201.6	577.4624941
