# Supplementary material for: Manx shearwater (Puffinus puffinus) rafting behaviour revealed by GPS tracking and behavioural observations
Source: PeerJ. 2019 Oct 21;7:e7863. doi: 10.7717/peerj.7863 (PMC6812691; doi:10.7717/peerj.7863)
Supplement: Data S2 [file peerj-07-7863-s004.csv]

Date	Time	POSIXct	Latitude	Longitude	ID	bearing	time_diff	distance_m	calc_speed	dist_from_skomer	wind	hour
22/07/2016	22:42:57	22/07/2016 22:42	51.75016	-5.280432	bird 1	298.5731965	1381	701.6911667	0.508103669	1440.718869	289.2	22:00:00
22/07/2016	23:05:58	22/07/2016 23:05	51.75317	-5.289361	bird 1	275.4443564	291	197.5548361	0.678882598	1838.467262	275.9	23:00:00
22/07/2016	23:10:49	22/07/2016 23:10	51.753338	-5.292209	bird 1	270.1225412	291	210.686776	0.72400954	1918.117633	275.9	23:00:00
22/07/2016	23:15:40	22/07/2016 23:15	51.753342	-5.29526	bird 1	272.2230632	290	230.1936012	0.793771038	2003.841721	269.4	23:00:00
22/07/2016	23:20:30	22/07/2016 23:20	51.753422	-5.298591	bird 1	277.6785908	287	318.1393731	1.108499558	2124.472796	269.4	23:00:00
22/07/2016	23:30:06	22/07/2016 23:30	51.752686	-5.292501	bird 1	289.3575277	289	106.3194457	0.367887355	1858.284706	271.7	23:00:00
22/07/2016	23:34:55	22/07/2016 23:34	51.753002	-5.293954	bird 1	275.0353044	290	277.146058	0.955676062	1930.664222	271.7	23:00:00
22/07/2016	23:39:45	22/07/2016 23:39	51.75322	-5.297952	bird 1	260.3502301	291	286.7507927	0.985397913	2082.195145	281.4	23:00:00
22/07/2016	23:44:36	22/07/2016 23:44	51.752789	-5.302046	bird 1	256.9488693	293	333.8377976	1.139378149	2204.485253	281.4	23:00:00
22/07/2016	23:49:29	22/07/2016 23:49	51.752113	-5.306756	bird 1	246.1244351	293	328.9068037	1.122548818	2366.113214	289.4	23:00:00
22/07/2016	23:54:22	22/07/2016 23:54	51.750919	-5.311113	bird 1	240.7137749	292	388.5420466	1.330623447	2506.593947	289.4	23:00:00
22/07/2016	23:59:14	22/07/2016 23:59	51.749214	-5.316023	bird 1	231.8510105	319	475.53657	1.490710251	2684.121116	281.9	23:00:00
23/07/2016	00:04:33	23/07/2016 00:04	51.746578	-5.321443	bird 1	232.7066893	291	476.36436	1.636990928	2896.530357	281.9	0:00:00
23/07/2016	00:09:24	23/07/2016 00:09	51.743988	-5.326935	bird 1	226.1487007	291	460.7239782	1.583243911	3172.385501	278.7	0:00:00
23/07/2016	00:14:15	23/07/2016 00:14	51.741123	-5.331751	bird 1	218.5263623	291	484.8784298	1.6662489	3441.377793	278.7	0:00:00
23/07/2016	00:19:06	23/07/2016 00:19	51.737717	-5.33613	bird 1	208.5620846	292	455.5491073	1.560099682	3716.323775	283.3	0:00:00
23/07/2016	00:23:58	23/07/2016 00:23	51.734123	-5.339289	bird 1	200.4719116	292	448.5879694	1.536260169	3948.956478	283.3	0:00:00
23/07/2016	00:28:50	23/07/2016 00:28	51.730347	-5.341565	bird 1	196.4943042	292	470.2796364	1.6105467	4161.890295	321.3	0:00:00
23/07/2016	00:33:42	23/07/2016 00:33	51.726295	-5.343502	bird 1	190.4704544	291	472.9905226	1.625396985	4396.189162	321.3	0:00:00
23/07/2016	00:38:33	23/07/2016 00:38	51.722115	-5.344749	bird 1	186.5138267	313	500.7010416	1.599683839	4627.015574	51.48	0:00:00
23/07/2016	00:43:46	23/07/2016 00:43	51.717644	-5.345573	bird 1	185.3614067	314	487.6914699	1.553157547	4880.968872	51.48	0:00:00
10/08/2016	02:32:03	10/08/2016 02:32	51.744755	-5.273511	bird 2	3.320963439	294	428.0820514	1.456061399	1025.624629	320	2:00:00
10/08/2016	23:52:49	10/08/2016 23:52	51.746147	-5.27793	bird 2	251.4373576	296	58.85255659	0.198826205	1031.617868	289.1	23:00:00
10/08/2016	23:57:45	10/08/2016 23:57	51.745979	-5.278738	bird 2	251.8011494	322	73.55707279	0.228438114	999.1303772	294.3	23:00:00
11/08/2016	00:03:07	11/08/2016 00:03	51.745773	-5.27975	bird 2	247.2047823	330	84.32538494	0.25553147	962.4330542	294.3	0:00:00
11/08/2016	00:08:37	11/08/2016 00:08	51.74548	-5.280876	bird 2	254.7270123	328	84.25316594	0.256869408	919.6702336	301.5	0:00:00
11/08/2016	00:14:05	11/08/2016 00:14	51.745281	-5.282053	bird 2	150.2476276	326	695.0355483	2.132010884	893.280776	301.5	0:00:00
11/08/2016	01:24:01	11/08/2016 01:24	51.739861	-5.27705	bird 2	175.5075154	1322	1729.90548	1.3085518	456.6185229	298.4	1:00:00
11/08/2016	01:55:36	11/08/2016 01:55	51.707623	-5.307665	bird 2	208.338555	289	290.5336692	1.005306814	3733.158479	301.1	1:00:00
11/08/2016	02:00:25	11/08/2016 02:00	51.705326	-5.309664	bird 2	204.0268876	288	217.5351651	0.755330434	4023.344969	301.1	2:00:00
11/08/2016	02:05:13	11/08/2016 02:05	51.703541	-5.310948	bird 2	216.0021152	289	216.3898179	0.748753695	4240.141575	291	2:00:00
11/08/2016	02:10:02	11/08/2016 02:10	51.701969	-5.312791	bird 2	232.8650466	290	227.4275355	0.784232881	4454.139016	291	2:00:00
11/08/2016	02:14:52	11/08/2016 02:14	51.700737	-5.315416	bird 2	245.2256533	289	253.826624	0.878292817	4661.408752	291	2:00:00
11/08/2016	02:19:41	11/08/2016 02:19	51.699783	-5.318751	bird 2	262.1669138	288	339.5735492	1.179074824	4868.951223	289.2	2:00:00
19/07/2016	02:40:34	19/07/2016 02:40	51.760826	-5.291026	bird 3	8.705859207	294	130.1267373	0.44260795	2691.795393	109.2	2:00:00
19/07/2016	02:45:28	19/07/2016 02:45	51.761982	-5.29074	bird 3	3.144277284	295	131.8234153	0.446859035	2812.944539	111.1	2:00:00
19/07/2016	02:50:23	19/07/2016 02:50	51.763165	-5.290635	bird 3	338.0309673	295	537.4454281	1.821848909	2940.245389	111.1	2:00:00
19/07/2016	02:55:18	19/07/2016 02:55	51.767643	-5.293554	bird 3	358.7741499	299	199.5403775	0.667359122	3469.516518	113.5	2:00:00
19/07/2016	03:00:17	19/07/2016 03:00	51.769436	-5.293616	bird 3	353.3582022	306	248.2333702	0.811220164	3664.921968	113.5	3:00:00
19/07/2016	03:05:23	19/07/2016 03:05	51.771652	-5.294033	bird 3	332.3082423	305	552.5717812	1.811710758	3911.812602	116.5	3:00:00
20/07/2016	00:02:34	20/07/2016 00:02	51.766655	-5.257936	bird 3	210.4029882	307	308.2586715	1.004099907	3670.730142	357.5	0:00:00
20/07/2016	00:07:41	20/07/2016 00:07	51.764267	-5.2602	bird 3	199.2304891	311	138.0268593	0.443816268	3363.444161	27	0:00:00
20/07/2016	00:12:52	20/07/2016 00:12	51.763096	-5.26086	bird 3	216.9230691	311	116.4585807	0.37446489	3226.768171	27	0:00:00
20/07/2016	00:18:03	20/07/2016 00:18	51.76226	-5.261875	bird 3	207.3326814	311	144.3613177	0.464184301	3112.277569	17.85	0:00:00
20/07/2016	00:23:14	20/07/2016 00:23	51.761108	-5.262837	bird 3	205.1001876	312	44.98957195	0.144197346	2968.092869	17.85	0:00:00
20/07/2016	00:28:26	20/07/2016 00:28	51.760742	-5.263114	bird 3	174.5389389	312	126.6384791	0.405892561	2923.168171	12.49	0:00:00
20/07/2016	00:33:38	20/07/2016 00:33	51.759609	-5.262939	bird 3	210.20642	314	127.7969321	0.406996599	2816.793468	12.49	0:00:00
20/07/2016	00:38:52	20/07/2016 00:38	51.758617	-5.263872	bird 3	232.8570092	313	112.5872536	0.359703686	2689.253965	45.1	0:00:00
20/07/2016	00:44:05	20/07/2016 00:44	51.758007	-5.265173	bird 3	211.7813198	312	141.4591065	0.453394572	2587.816296	45.1	0:00:00
20/07/2016	00:49:17	20/07/2016 00:49	51.756927	-5.266254	bird 3	222.1826873	315	120.8608603	0.383685271	2447.090616	45.05	0:00:00
20/07/2016	00:54:32	20/07/2016 00:54	51.756123	-5.267431	bird 3	217.698055	312	114.9948129	0.368573118	2331.104647	45.05	0:00:00
20/07/2016	00:59:44	20/07/2016 00:59	51.755306	-5.268451	bird 3	225.535973	312	107.3586576	0.344098262	2218.883356	55.05	0:00:00
20/07/2016	01:04:56	20/07/2016 01:04	51.754631	-5.269562	bird 3	214.0811456	309	72.33096632	0.234080797	2118.744602	55.05	1:00:00
20/07/2016	01:10:05	20/07/2016 01:10	51.754093	-5.27015	bird 3	209.602024	311	99.61927816	0.320319222	2047.629634	50.62	1:00:00
20/07/2016	01:15:16	20/07/2016 01:15	51.753315	-5.270864	bird 3	232.0262661	307	67.73729308	0.220642648	1948.663446	60.01	1:00:00
20/07/2016	01:20:23	20/07/2016 01:20	51.752941	-5.271638	bird 3	231.6651168	307	71.32722469	0.232336237	1889.534846	60.01	1:00:00
20/07/2016	01:25:30	20/07/2016 01:25	51.752544	-5.272449	bird 3	183.8052062	308	53.97071243	0.175229586	1827.679065	68.2	1:00:00
20/07/2016	01:30:38	20/07/2016 01:30	51.75206	-5.272501	bird 3	201.2883954	309	40.61343433	0.131435063	1776.361562	68.2	1:00:00
20/07/2016	01:35:47	20/07/2016 01:35	51.75172	-5.272715	bird 3	190.8914764	308	41.92619035	0.136123995	1735.78989	48.74	1:00:00
20/07/2016	01:40:55	20/07/2016 01:40	51.75135	-5.27283	bird 3	151.6622016	308	52.99706784	0.172068402	1694.699917	48.74	1:00:00
20/07/2016	01:46:03	20/07/2016 01:46	51.750931	-5.272465	bird 3	299.4490429	308	58.72832018	0.190676364	1661.625986	296.5	1:00:00
20/07/2016	01:51:11	20/07/2016 01:51	51.75119	-5.273206	bird 3	315.6425396	307	30.38309181	0.098967726	1668.509069	296.5	1:00:00
20/07/2016	01:56:18	20/07/2016 01:56	51.751385	-5.273514	bird 3	187.2343739	308	249.4438202	0.809882533	1681.044339	313.2	1:00:00
20/07/2016	02:01:26	20/07/2016 02:01	51.749161	-5.27397	bird 3	250.1418993	307	146.7393115	0.477978213	1439.851804	313.2	2:00:00
20/07/2016	02:06:33	20/07/2016 02:06	51.748714	-5.275969	bird 3	351.312379	308	52.90348992	0.171764578	1344.4641	318.4	2:00:00
20/07/2016	02:11:41	20/07/2016 02:11	51.749184	-5.276085	bird 3	38.1095506	309	33.40467026	0.108105729	1391.699406	318.4	2:00:00
20/07/2016	02:16:50	20/07/2016 02:16	51.74942	-5.275786	bird 3	14.2560078	310	59.58941375	0.192223915	1422.966629	340.5	2:00:00
20/07/2016	02:27:09	20/07/2016 02:27	51.767307	-5.284116	bird 3	349.7106523	306	690.7604966	2.257387244	3345.122608	337	2:00:00
20/07/2016	02:32:15	20/07/2016 02:32	51.773415	-5.285908	bird 3	53.9934156	307	88.91474082	0.289624563	4029.847663	337	2:00:00
20/07/2016	02:37:22	20/07/2016 02:37	51.773884	-5.284865	bird 3	29.68994163	308	91.37716679	0.296679113	4077.991396	30.47	2:00:00
20/07/2016	02:42:30	20/07/2016 02:42	51.774597	-5.284208	bird 3	25.80755549	308	101.8880233	0.33080527	4155.416812	30.47	2:00:00
22/07/2016	02:46:23	22/07/2016 02:46	51.74379	-5.280124	bird 4	339.8953216	299	489.1280045	1.635879614	740.9108234	158.8	2:00:00
22/07/2016	02:51:22	22/07/2016 02:51	51.747917	-5.282564	bird 4	355.7118311	295	68.17325718	0.231095787	1186.674452	158.8	2:00:00
22/07/2016	02:56:17	22/07/2016 02:56	51.748528	-5.282638	bird 4	355.7791976	304	84.23288147	0.277081847	1254.71915	158.7	2:00:00
22/07/2016	03:01:21	22/07/2016 03:01	51.749283	-5.282728	bird 4	343.3145179	311	65.98911389	0.212183646	1338.809798	158.7	3:00:00
22/07/2016	03:06:32	22/07/2016 03:06	51.749851	-5.283003	bird 4	359.8484147	311	78.10662147	0.251146693	1402.594085	158	3:00:00
22/07/2016	03:11:43	22/07/2016 03:11	51.750553	-5.283006	bird 4	49.30669049	311	99.80596772	0.32091951	1480.598438	158	3:00:00
22/07/2016	03:16:54	22/07/2016 03:16	51.751137	-5.281909	bird 4	7.049181798	311	88.12194139	0.283350294	1544.505627	161.6	3:00:00
22/07/2016	03:22:05	22/07/2016 03:22	51.751923	-5.281752	bird 4	59.53866939	313	146.6717573	0.468599864	1632.052156	161.6	3:00:00
22/07/2016	03:42:49	22/07/2016 03:42	51.713245	-5.312406	bird 4	154.2369674	312	376.7373744	1.207491584	3385.561082	158.6	3:00:00
22/07/2016	03:48:01	22/07/2016 03:48	51.710197	-5.310032	bird 4	162.5515893	311	715.5589493	2.300832634	3568.17362	159.5	3:00:00
22/07/2016	20:00:53	22/07/2016 20:00	51.706783	-5.319192	bird 4	345.4409587	312	344.8014083	1.105132719	4240.331276	302.4	20:00:00
22/07/2016	20:06:05	22/07/2016 20:06	51.709782	-5.320449	bird 4	344.120375	315	342.4689277	1.087202945	4034.973982	290.5	20:00:00
22/07/2016	20:11:20	22/07/2016 20:11	51.712742	-5.321808	bird 4	342.7460304	315	359.1504949	1.140160301	3857.577149	290.5	20:00:00
22/07/2016	20:16:35	22/07/2016 20:16	51.715824	-5.323353	bird 4	338.8807562	314	361.8792243	1.152481606	3704.401292	291.6	20:00:00
22/07/2016	20:21:49	22/07/2016 20:21	51.718857	-5.325244	bird 4	342.3584836	316	384.4429361	1.21659157	3603.447732	291.6	20:00:00
22/07/2016	20:27:05	22/07/2016 20:27	51.722149	-5.326934	bird 4	342.3438343	317	433.8771965	1.368697781	3510.732234	296.8	20:00:00
22/07/2016	20:32:22	22/07/2016 20:32	51.725864	-5.328843	bird 4	340.5664963	318	431.3569875	1.356468514	3454.848718	296.8	20:00:00
22/07/2016	20:37:40	22/07/2016 20:37	51.729519	-5.330925	bird 4	341.8109173	319	446.9056393	1.400958117	3466.083962	293.2	20:00:00
22/07/2016	20:42:59	22/07/2016 20:42	51.733334	-5.332949	bird 4	341.970409	319	479.8531266	1.504241776	3524.061457	293.2	20:00:00
22/07/2016	20:48:18	22/07/2016 20:48	51.737434	-5.335104	bird 4	342.6948718	320	514.9833081	1.609322838	3645.378265	296.6	20:00:00
22/07/2016	20:53:38	22/07/2016 20:53	51.741852	-5.337327	bird 4	339.861615	317	547.2025386	1.726190973	3832.556412	296.6	20:00:00
22/07/2016	20:58:55	22/07/2016 20:58	51.746468	-5.340061	bird 4	341.0943707	314	577.964086	1.840649956	4115.987447	299.1	20:00:00
22/07/2016	21:04:09	22/07/2016 21:04	51.751381	-5.342779	bird 4	340.0383343	309	579.9770025	1.876948228	4459.269411	299.1	21:00:00
22/07/2016	21:09:18	22/07/2016 21:09	51.756279	-5.345653	bird 4	344.5263355	311	617.5289518	1.985623639	4856.141678	303.5	21:00:00
22/07/2016	02:23:52	22/07/2016 02:23	51.745461	-5.276587	bird 5	43.22191669	292	115.4177322	0.395266206	990.7444308	155.2	2:00:00
22/07/2016	02:28:44	22/07/2016 02:28	51.746216	-5.275441	bird 5	2.069702386	291	101.0926736	0.347397504	1099.454377	155.7	2:00:00
22/07/2016	02:33:35	22/07/2016 02:33	51.747124	-5.275388	bird 5	51.94892874	293	258.5561065	0.88244405	1193.209712	155.7	2:00:00
22/07/2016	02:38:28	22/07/2016 02:38	51.748554	-5.272437	bird 5	24.46384874	292	42.43496049	0.145325207	1424.488529	154.9	2:00:00
22/07/2016	02:43:20	22/07/2016 02:43	51.748901	-5.272182	bird 5	68.7877322	293	194.1718552	0.662702578	1466.798199	154.9	2:00:00
22/07/2016	02:48:13	22/07/2016 02:48	51.749531	-5.26956	bird 5	45.25668942	292	65.83849578	0.225474301	1618.240869	158.8	2:00:00
22/07/2016	02:53:05	22/07/2016 02:53	51.749947	-5.268882	bird 5	55.67826191	293	68.59486996	0.234112184	1682.379051	158.8	2:00:00
22/07/2016	02:57:58	22/07/2016 02:57	51.750294	-5.268061	bird 5	61.84916951	305	75.61768716	0.247926843	1745.691216	158.7	2:00:00
22/07/2016	03:03:03	22/07/2016 03:03	51.750614	-5.267095	bird 5	72.2641283	304	36.24380965	0.119223058	1812.602282	158.7	3:00:00
22/07/2016	03:08:07	22/07/2016 03:08	51.750713	-5.266595	bird 5	63.98159853	305	101.924624	0.334179095	1841.464138	158	3:00:00
22/07/2016	03:13:12	22/07/2016 03:13	51.751114	-5.265268	bird 5	34.11288406	305	85.6736538	0.280897226	1931.507406	158	3:00:00
22/07/2016	03:18:17	22/07/2016 03:18	51.751751	-5.264571	bird 5	15.23257127	305	106.4538394	0.349028982	2016.952313	161.6	3:00:00
22/07/2016	03:23:22	22/07/2016 03:23	51.752674	-5.264165	bird 5	35.80910881	308	93.78875068	0.304508931	2116.158851	161.6	3:00:00
22/07/2016	03:28:30	22/07/2016 03:28	51.753357	-5.263369	bird 5	52.16036635	309	93.55747341	0.302774995	2209.807611	159.9	3:00:00
22/07/2016	03:33:39	22/07/2016 03:33	51.753872	-5.262298	bird 5	42.76505734	309	89.67580189	0.290212951	2299.551682	159.9	3:00:00
22/07/2016	03:38:48	22/07/2016 03:38	51.754463	-5.261415	bird 5	38.60580831	308	112.5928088	0.365561068	2388.552781	158.6	3:00:00
22/07/2016	03:43:56	22/07/2016 03:43	51.755253	-5.260396	bird 5	19.44421027	308	104.9253089	0.340666587	2500.907106	158.6	3:00:00
22/07/2016	03:49:04	22/07/2016 03:49	51.756142	-5.259889	bird 5	23.5747526	309	107.8430202	0.349006538	2601.139594	159.5	3:00:00
22/07/2016	03:54:13	22/07/2016 03:54	51.75703	-5.259263	bird 5	30.71237028	310	109.2995023	0.35257904	2706.394651	159.5	3:00:00
22/07/2016	03:59:23	22/07/2016 03:59	51.757874	-5.258453	bird 5	27.15441882	341	107.3468834	0.314800245	2815.16586	157.6	3:00:00
22/07/2016	04:05:04	22/07/2016 04:05	51.758732	-5.257742	bird 5	14.62836833	304	76.3661652	0.251204491	2921.308312	157.7	4:00:00
22/07/2016	04:10:08	22/07/2016 04:10	51.759396	-5.257462	bird 5	13.24706127	301	80.25254973	0.266619767	2992.893171	157.7	4:00:00
04/08/2016	03:27:06	04/08/2016 03:27	51.756672	-5.272434	bird 6	21.75314326	310	110.6086648	0.356802145	2261.38762	268.4	3:00:00
04/08/2016	03:32:16	04/08/2016 03:32	51.757595	-5.271839	bird 6	26.67525493	310	113.1192753	0.364900888	2371.562493	268.4	3:00:00
04/08/2016	03:37:26	04/08/2016 03:37	51.758503	-5.271102	bird 6	5.649899174	310	551.8883251	1.78028492	2483.157813	269.3	3:00:00
04/08/2016	03:42:36	04/08/2016 03:42	51.763439	-5.270313	bird 6	20.62700709	311	104.4138587	0.33573588	3024.459	269.3	3:00:00
04/08/2016	03:52:57	04/08/2016 03:52	51.771641	-5.26915	bird 6	35.77048183	310	144.5268832	0.466215752	3927.88039	264.3	3:00:00
04/08/2016	03:58:07	04/08/2016 03:58	51.772694	-5.267924	bird 6	33.31331675	313	135.110572	0.431663169	4061.506306	265.4	3:00:00
04/08/2016	04:03:20	04/08/2016 04:03	51.773708	-5.266847	bird 6	19.58434145	307	366.9110736	1.195150077	4189.052844	265.4	4:00:00
04/08/2016	22:21:19	04/08/2016 22:21	51.755508	-5.275313	bird 6	238.4765599	302	172.2622766	0.570404889	2084.522346	277.2	22:00:00
04/08/2016	22:26:21	04/08/2016 22:26	51.7547	-5.277441	bird 6	238.214578	304	174.3734771	0.573596964	1967.661281	283.1	22:00:00
04/08/2016	22:31:25	04/08/2016 22:31	51.753876	-5.279589	bird 6	240.1958166	305	174.4908429	0.572101124	1857.456368	283.1	22:00:00
04/08/2016	22:36:30	04/08/2016 22:36	51.753098	-5.281783	bird 6	247.3437912	306	166.7336076	0.544881071	1762.654621	288	22:00:00
28/07/2016	01:34:08	28/07/2016 01:34	51.762802	-5.296547	bird 8	285.8604343	297	633.8971818	2.134333946	3009.027163	194.5	1:00:00
28/07/2016	01:39:05	28/07/2016 01:39	51.764355	-5.305381	bird 8	280.0508222	298	233.9503802	0.78506839	3411.643789	200.9	1:00:00
28/07/2016	01:44:03	28/07/2016 01:44	51.764721	-5.308718	bird 8	302.8335828	303	224.2944999	0.740245874	3559.955376	200.9	1:00:00
28/07/2016	01:49:06	28/07/2016 01:49	51.765812	-5.31145	bird 8	317.921613	327	179.1947209	0.547996088	3761.911891	205.7	1:00:00
28/07/2016	01:54:33	28/07/2016 01:54	51.767006	-5.313192	bird 8	334.9625479	299	159.8405228	0.534583688	3938.365594	205.7	1:00:00
28/07/2016	01:59:32	28/07/2016 01:59	51.768307	-5.314174	bird 8	348.470401	296	122.9920682	0.415513744	4096.60908	207.5	1:00:00
28/07/2016	02:04:28	28/07/2016 02:04	51.76939	-5.314531	bird 8	355.0397581	292	97.94633731	0.335432662	4211.565366	207.5	2:00:00
28/07/2016	02:09:20	28/07/2016 02:09	51.770267	-5.314654	bird 8	352.9448464	291	57.73986246	0.198418771	4299.018502	203.6	2:00:00
28/07/2016	02:14:11	28/07/2016 02:14	51.770782	-5.314757	bird 8	314.9632852	293	31.37323967	0.107075903	4351.672116	203.6	2:00:00
28/07/2016	02:19:04	28/07/2016 02:19	51.770981	-5.315079	bird 8	227.638489	291	164.6952859	0.565963182	4382.063241	203.8	2:00:00
28/07/2016	02:23:55	28/07/2016 02:23	51.769985	-5.316844	bird 8	271.6369161	291	89.84374229	0.308741382	4353.077914	203.8	2:00:00
28/07/2016	02:28:46	28/07/2016 02:28	51.770008	-5.318145	bird 8	273.6114317	290	122.2162431	0.421435321	4404.937628	213.5	2:00:00
28/07/2016	02:33:36	28/07/2016 02:33	51.770077	-5.319912	bird 8	282.674608	291	153.0197245	0.525840978	4480.701586	213.5	2:00:00
28/07/2016	02:38:27	28/07/2016 02:38	51.770378	-5.322075	bird 8	285.3318824	290	180.1232537	0.621114668	4595.431414	217.8	2:00:00
28/07/2016	02:43:17	28/07/2016 02:43	51.770805	-5.324592	bird 8	290.1266539	292	190.5706376	0.65263917	4738.346334	217.8	2:00:00
28/07/2016	02:48:09	28/07/2016 02:48	51.771393	-5.327185	bird 8	300.9718716	291	230.4866718	0.792050418	4900.853919	217.6	2:00:00
29/07/2016	23:13:47	29/07/2016 23:13	51.739281	-5.276021	bird 8	246.6005681	290	510.9462503	1.761883622	479.7057647	320.5	23:00:00
04/08/2016	02:55:21	04/08/2016 02:55	51.742825	-5.273089	bird 8	14.93173364	298	414.7301803	1.391712015	880.4331483	265.1	2:00:00
04/08/2016	03:00:19	04/08/2016 03:00	51.746426	-5.271538	bird 8	350.3200535	286	338.4079926	1.183244729	1255.776248	265.1	3:00:00
04/08/2016	03:05:05	04/08/2016 03:05	51.749424	-5.272364	bird 8	354.3718993	288	296.3933953	1.029143734	1512.784001	265.5	3:00:00
04/08/2016	03:09:53	04/08/2016 03:09	51.752075	-5.272786	bird 8	10.98475225	288	114.5967969	0.397905545	1770.658232	265.5	3:00:00
04/08/2016	03:14:41	04/08/2016 03:14	51.753086	-5.272469	bird 8	358.6219938	287	214.7994085	0.748429995	1883.403952	265.5	3:00:00
04/08/2016	03:19:28	04/08/2016 03:19	51.755016	-5.272544	bird 8	341.9352607	287	380.0975098	1.324381567	2083.812903	264.3	3:00:00
04/08/2016	03:29:02	04/08/2016 03:29	51.765892	-5.27903	bird 8	33.91757659	287	111.6425633	0.388998478	3192.390406	268.4	3:00:00
04/08/2016	03:33:49	04/08/2016 03:33	51.766724	-5.278126	bird 8	353.3258071	287	476.8951208	1.661655473	3289.373813	268.4	3:00:00
04/08/2016	03:38:36	04/08/2016 03:38	51.770981	-5.278931	bird 8	13.96308969	287	275.0890857	0.958498556	3757.558312	269.3	3:00:00
04/08/2016	03:48:11	04/08/2016 03:48	51.781494	-5.279167	bird 8	11.07629183	287	219.2886039	0.76407179	4924.275285	264.3	3:00:00
05/08/2016	00:34:41	05/08/2016 00:34	51.742592	-5.278685	bird 8	208.6640749	290	623.340884	2.149451324	640.7463029	292.4	0:00:00
05/08/2016	02:31:19	05/08/2016 02:31	51.7449	-5.275711	bird 8	7.207825284	298	294.2905029	0.987552023	959.9480907	308.8	2:00:00
05/08/2016	02:36:17	05/08/2016 02:36	51.747524	-5.275175	bird 8	356.5793472	298	303.6230228	1.018869204	1239.88599	308.7	2:00:00
05/08/2016	02:41:15	05/08/2016 02:41	51.750248	-5.275438	bird 8	13.66301179	298	84.28628613	0.282839886	1517.945059	308.7	2:00:00
05/08/2016	02:46:13	05/08/2016 02:46	51.750984	-5.275149	bird 8	1.200575171	298	433.9088439	1.456069946	1601.963097	307.1	2:00:00
05/08/2016	02:51:11	05/08/2016 02:51	51.754883	-5.275017	bird 8	5.634381285	298	35.77780544	0.12005975	2021.754472	307.1	2:00:00
05/08/2016	02:56:09	05/08/2016 02:56	51.755203	-5.274966	bird 8	320.1272517	301	78.07882045	0.259398075	2057.127529	311.5	2:00:00
05/08/2016	03:01:10	05/08/2016 03:01	51.755741	-5.275692	bird 8	342.3884808	299	59.19820679	0.197987314	2104.085695	311.5	3:00:00
05/08/2016	03:06:09	05/08/2016 03:06	51.756248	-5.275952	bird 8	1.653372619	298	150.3788808	0.504627117	2155.591566	313	3:00:00
05/08/2016	03:11:07	05/08/2016 03:11	51.757599	-5.275889	bird 8	348.8156825	300	370.3422419	1.23447414	2303.829585	313	3:00:00
05/08/2016	03:16:07	05/08/2016 03:16	51.760864	-5.276932	bird 8	354.711183	298	325.7250781	1.093037175	2650.596743	309.7	3:00:00
05/08/2016	03:21:05	05/08/2016 03:21	51.763779	-5.277368	bird 8	1.796946351	298	24.1559817	0.081060341	2968.558266	309.7	3:00:00
05/08/2016	03:26:03	05/08/2016 03:26	51.763996	-5.277357	bird 8	63.20929024	303	48.23497324	0.159191331	2992.62256	304.1	3:00:00
05/08/2016	03:36:32	05/08/2016 03:36	51.771305	-5.281417	bird 8	37.66060953	298	76.81282367	0.257761153	3787.334393	307.3	3:00:00
05/08/2016	03:41:30	05/08/2016 03:41	51.771851	-5.280736	bird 8	25.04725218	299	70.77281343	0.236698373	3848.954231	307.3	3:00:00
05/08/2016	03:46:29	05/08/2016 03:46	51.772427	-5.280301	bird 8	33.60846463	298	83.02827927	0.278618387	3913.849252	300	3:00:00
05/08/2016	03:51:27	05/08/2016 03:51	51.773048	-5.279634	bird 8	39.06390824	298	123.7940519	0.415416281	3984.608314	300	3:00:00
05/08/2016	03:56:25	05/08/2016 03:56	51.773911	-5.278502	bird 8	16.27717652	300	99.00649094	0.330021636	4084.548877	305.6	3:00:00
05/08/2016	04:01:25	05/08/2016 04:01	51.774765	-5.278099	bird 8	41.97408403	298	61.73065912	0.207149863	4181.097462	305.6	4:00:00
05/08/2016	04:06:23	05/08/2016 04:06	51.775177	-5.2775	bird 8	28.56201881	299	181.3870136	0.606645531	4229.738265	293.3	4:00:00
05/08/2016	04:11:22	05/08/2016 04:11	51.776608	-5.276241	bird 8	338.2867729	297	315.6818682	1.062901913	4395.605911	293.3	4:00:00
05/08/2016	23:47:11	05/08/2016 23:47	51.741901	-5.280677	bird 8	185.3116838	316	548.5545431	1.735932098	527.4606996	246.1	23:00:00
04/08/2016	02:07:15	04/08/2016 02:07	51.722073	-5.284574	bird 9	213.2063691	300	416.8001019	1.389333673	1695.498833	266.6	2:00:00
04/08/2016	02:12:15	04/08/2016 02:12	51.718941	-5.287883	bird 9	201.6044045	303	331.1189045	1.092801665	2073.366519	266.6	2:00:00
04/08/2016	02:17:18	04/08/2016 02:17	51.716175	-5.289651	bird 9	233.7228977	301	119.2283712	0.396107546	2399.243056	262	2:00:00
04/08/2016	02:22:19	04/08/2016 02:22	51.715542	-5.291043	bird 9	233.8162602	301	642.3628426	2.134095823	2489.826827	262	2:00:00
04/08/2016	02:37:51	04/08/2016 02:37	51.708057	-5.326857	bird 9	163.655985	297	478.146758	1.609921744	4473.52862	271.7	2:00:00
04/08/2016	02:42:48	04/08/2016 02:42	51.703934	-5.324906	bird 9	157.9977	296	462.5308754	1.562604309	4731.835099	271.7	2:00:00
04/08/2016	02:47:44	04/08/2016 02:47	51.700081	-5.322394	bird 9	166.0696785	296	403.6826797	1.363792837	4975.904078	270.9	2:00:00
05/08/2016	02:36:41	05/08/2016 02:36	51.747433	-5.274007	bird 10	18.98418491	282	121.5786962	0.431130129	1264.189208	308.7	2:00:00
05/08/2016	02:41:23	05/08/2016 02:41	51.748466	-5.273433	bird 10	3.679358784	281	572.0738654	2.035850055	1384.737498	308.7	2:00:00
05/08/2016	02:46:04	05/08/2016 02:46	51.753597	-5.2729	bird 10	4.509565409	280	75.33673439	0.269059766	1926.611797	307.1	2:00:00
05/08/2016	02:50:44	05/08/2016 02:50	51.754272	-5.272814	bird 10	18.98722285	280	298.127262	1.064740221	1999.486555	307.1	2:00:00
05/08/2016	02:55:24	05/08/2016 02:55	51.756805	-5.271406	bird 10	349.8817638	288	81.15522024	0.281788959	2297.349098	311.5	2:00:00
05/08/2016	03:00:12	05/08/2016 03:00	51.757523	-5.271613	bird 10	12.53888412	313	375.6150065	1.200047944	2368.651543	311.5	3:00:00
05/08/2016	03:05:25	05/08/2016 03:05	51.760818	-5.270429	bird 10	10.26787481	311	88.0916497	0.283252893	2742.592672	313	3:00:00
05/08/2016	03:15:50	05/08/2016 03:15	51.770206	-5.267928	bird 10	12.75091455	314	265.4892285	0.845507097	3793.555691	309.7	3:00:00
05/08/2016	03:26:18	05/08/2016 03:26	51.779606	-5.263142	bird 10	49.043914	315	127.1560323	0.403669944	4888.615924	304.1	3:00:00
05/08/2016	03:31:33	05/08/2016 03:31	51.780354	-5.261749	bird 10	62.21971426	316	132.9993915	0.42088415	4994.918408	304.1	3:00:00
05/08/2016	22:34:04	05/08/2016 22:34	51.759029	-5.279646	bird 10	222.2585715	308	199.1181717	0.64648757	2428.157558	235.9	22:00:00
05/08/2016	22:39:12	05/08/2016 22:39	51.757706	-5.281588	bird 10	232.6785588	307	197.7809722	0.644237695	2275.191491	242.4	22:00:00
05/08/2016	22:44:19	05/08/2016 22:44	51.75663	-5.283868	bird 10	176.5259637	305	563.8079198	1.848550557	2158.383582	242.4	22:00:00
05/08/2016	22:49:24	05/08/2016 22:49	51.751572	-5.283372	bird 10	259.5811431	305	162.8163904	0.533824231	1594.9394	247.3	22:00:00
05/08/2016	22:59:33	05/08/2016 22:59	51.740978	-5.275732	bird 10	238.7953246	306	203.5339489	0.665143624	606.8548805	246.2	22:00:00
05/08/2016	23:04:39	05/08/2016 23:04	51.740032	-5.278254	bird 10	345.2953054	302	172.9191191	0.572579865	410.3428821	246.2	23:00:00
05/08/2016	23:09:41	05/08/2016 23:09	51.741535	-5.278891	bird 10	123.2745185	303	194.4185062	0.641645235	527.3397711	245.4	23:00:00
05/08/2016	23:14:44	05/08/2016 23:14	51.740578	-5.276536	bird 10	287.4254343	303	194.4105839	0.641619089	536.0715809	245.4	23:00:00
06/08/2016	00:02:32	06/08/2016 00:02	51.7411	-5.279222	bird 10	198.2849091	352	418.9025127	1.190063957	473.8698286	247.1	0:00:00
06/08/2016	02:55:02	06/08/2016 02:55	51.779987	-5.260078	bird 11	157.7816274	308	117.8266666	0.382554112	4989.60281	262	2:00:00
06/08/2016	03:00:10	06/08/2016 03:00	51.779007	-5.259431	bird 11	116.3088889	309	109.4263247	0.354130501	4899.969078	262	3:00:00
06/08/2016	03:05:19	06/08/2016 03:05	51.778572	-5.258009	bird 11	126.8429442	308	39.03079519	0.126723361	4886.587362	259.8	3:00:00
06/08/2016	03:10:27	06/08/2016 03:10	51.778362	-5.257556	bird 11	78.30458814	308	54.47508958	0.176867174	4875.381943	259.8	3:00:00
06/08/2016	22:17:41	06/08/2016 22:17	51.744793	-5.273205	bird 11	256.9270873	344	227.7917823	0.662185414	1041.408475	235.1	22:00:00
06/08/2016	22:23:25	06/08/2016 22:23	51.744331	-5.276418	bird 11	194.2544347	405	712.5375945	1.759352085	881.4404474	235.1	22:00:00
06/08/2016	22:30:10	06/08/2016 22:30	51.738125	-5.278964	bird 11	313.2733462	309	763.312537	2.47026711	241.0591062	232.3	22:00:00
07/08/2016	02:27:00	07/08/2016 02:27	51.722187	-5.288213	bird 12	238.407572	295	661.4795857	2.242303681	1725.704668	245	2:00:00
07/08/2016	02:36:51	07/08/2016 02:36	51.714931	-5.305892	bird 12	203.8903116	295	402.5896504	1.364710679	2971.289815	245.4	2:00:00
07/08/2016	02:41:46	07/08/2016 02:41	51.711624	-5.308256	bird 12	183.5669986	295	298.0946051	1.010490187	3368.638099	245.4	2:00:00
07/08/2016	02:46:41	07/08/2016 02:46	51.70895	-5.308525	bird 12	199.5302376	296	478.8448411	1.617719058	3632.853294	246.3	2:00:00
07/08/2016	02:51:37	07/08/2016 02:51	51.704895	-5.310846	bird 12	175.5996425	295	678.5926431	2.300314044	4104.259719	246.3	2:00:00
07/08/2016	21:42:56	07/08/2016 21:42	51.731064	-5.269948	bird 12	298.95405	442	78.98853433	0.178707091	1086.584739	261.2	21:00:00
07/08/2016	21:50:18	07/08/2016 21:50	51.731407	-5.270949	bird 12	213.4234747	443	120.0713153	0.271041344	1009.170339	265	21:00:00
07/08/2016	21:57:41	07/08/2016 21:57	51.730507	-5.271908	bird 12	297.8691518	496	173.8704701	0.350545303	1029.94322	263.9	21:00:00
07/08/2016	22:05:57	07/08/2016 22:05	51.731236	-5.274134	bird 12	260.502238	515	160.1911326	0.311050743	867.6207479	265.2	22:00:00
07/08/2016	22:14:32	07/08/2016 22:14	51.730999	-5.276421	bird 12	248.3670953	307	140.6473575	0.458134715	799.5548939	265.2	22:00:00
07/08/2016	22:19:39	07/08/2016 22:19	51.730534	-5.278314	bird 12	244.9941504	306	201.2488843	0.657676092	792.2583048	267.6	22:00:00
07/08/2016	22:24:45	07/08/2016 22:24	51.729771	-5.280955	bird 12	241.7814194	306	219.5037525	0.717332525	835.5542201	267.6	22:00:00
07/08/2016	22:29:51	07/08/2016 22:29	51.72884	-5.283756	bird 12	233.3677507	306	285.7653039	0.933873542	941.3036029	271.5	22:00:00
07/08/2016	22:34:57	07/08/2016 22:34	51.72731	-5.287078	bird 12	244.7840493	306	367.418616	1.200714431	1155.666046	271.5	22:00:00
09/08/2016	00:41:35	09/08/2016 00:41	51.742413	-5.283713	bird 13	162.4512915	569	114.5028624	0.201235259	584.1419125	337.3	0:00:00
09/08/2016	01:50:53	09/08/2016 01:50	51.726345	-5.283103	bird 13	192.9828972	491	208.6355721	0.424919699	1214.058184	338.1	1:00:00
10/08/2016	01:44:44	10/08/2016 01:44	51.756439	-5.268086	bird 13	204.2791623	2375	2405.857743	1.012992734	2343.783344	327.3	1:00:00
10/08/2016	02:09:52	10/08/2016 02:09	51.758442	-5.279371	bird 14	318.5437375	297	168.393918	0.566982889	2364.522504	320.1	2:00:00
10/08/2016	02:14:49	10/08/2016 02:14	51.759575	-5.280988	bird 14	259.0610454	297	116.3744646	0.391833214	2483.990355	320.1	2:00:00
10/08/2016	02:19:46	10/08/2016 02:19	51.759377	-5.282643	bird 14	261.4257363	297	125.680158	0.423165515	2460.870581	318.8	2:00:00
10/08/2016	02:24:43	10/08/2016 02:24	51.759209	-5.284443	bird 14	265.1354151	297	131.520706	0.44283066	2446.998836	318.8	2:00:00
10/08/2016	02:29:40	10/08/2016 02:29	51.759109	-5.286341	bird 14	309.7453652	297	327.1396536	1.101480315	2447.788431	320	2:00:00
10/08/2016	02:34:37	10/08/2016 02:34	51.760986	-5.289988	bird 14	320.5986839	297	675.8898658	2.275723454	2693.937281	320	2:00:00
16/08/2016	21:59:01	16/08/2016 21:59	51.743824	-5.279349	bird 14	2.541240354	308	94.77806923	0.307721004	756.5132874	144.2	21:00:00
16/08/2016	22:14:22	16/08/2016 22:14	51.764	-5.245937	bird 14	235.517385	309	130.7183959	0.42303688	3881.825782	143.1	22:00:00
16/08/2016	22:19:31	16/08/2016 22:19	51.763336	-5.247499	bird 14	233.551443	310	136.0024716	0.43871765	3756.337866	139.6	22:00:00
16/08/2016	22:24:41	16/08/2016 22:24	51.762611	-5.249085	bird 14	233.8895815	309	135.5894636	0.438800853	3624.881159	139.6	22:00:00
16/08/2016	22:29:50	16/08/2016 22:29	51.761894	-5.250673	bird 14	60.35072496	310	29.29604544	0.094503372	3494.36011	139.7	22:00:00
16/08/2016	22:35:00	16/08/2016 22:35	51.762024	-5.250304	bird 14	237.4092	313	121.6805024	0.388755599	3521.472084	139.7	22:00:00
16/08/2016	22:40:13	16/08/2016 22:40	51.761436	-5.25179	bird 14	237.0024624	313	128.736518	0.41129878	3406.839705	140.9	22:00:00
16/08/2016	22:45:26	16/08/2016 22:45	51.760807	-5.253355	bird 14	233.8627112	321	129.8327251	0.404463318	3285.77397	146.3	22:00:00
16/08/2016	22:50:47	16/08/2016 22:50	51.76012	-5.254875	bird 14	235.4359669	316	111.5884338	0.353127955	3161.936052	146.3	22:00:00
16/08/2016	22:56:03	16/08/2016 22:56	51.759552	-5.256207	bird 14	237.778994	330	118.7447279	0.359832509	3056.872226	144.9	22:00:00
16/08/2016	23:01:33	16/08/2016 23:01	51.758984	-5.257663	bird 14	232.0406383	342	127.9082095	0.374000613	2947.373566	144.9	23:00:00
16/08/2016	23:07:15	16/08/2016 23:07	51.758278	-5.259125	bird 14	231.3163367	305	121.0608221	0.396920728	2825.652677	139	23:00:00
16/08/2016	23:12:20	16/08/2016 23:12	51.757599	-5.260495	bird 14	233.6049076	304	111.7575527	0.367623528	2710.466175	139	23:00:00
16/08/2016	23:17:24	16/08/2016 23:17	51.757004	-5.261799	bird 14	238.0913107	304	107.130885	0.352404227	2606.106686	138.8	23:00:00
16/08/2016	23:22:28	16/08/2016 23:22	51.756496	-5.263117	bird 14	231.7801263	305	101.5896984	0.333080978	2510.101231	138.8	23:00:00
16/08/2016	23:27:33	16/08/2016 23:27	51.755932	-5.264274	bird 14	231.7748008	305	98.87617294	0.324184174	2415.272012	134.7	23:00:00
16/08/2016	23:32:38	16/08/2016 23:32	51.755383	-5.2654	bird 14	233.5459422	305	82.34153578	0.269972248	2323.502986	134.7	23:00:00
16/08/2016	23:37:43	16/08/2016 23:37	51.754944	-5.26636	bird 14	235.2671913	304	80.59633747	0.265119531	2248.551907	134.2	23:00:00
16/08/2016	23:42:47	16/08/2016 23:42	51.754532	-5.26732	bird 14	223.8163916	304	77.1935841	0.253926263	2176.771704	134.2	23:00:00
16/08/2016	23:47:51	16/08/2016 23:47	51.754032	-5.268095	bird 14	231.8561762	304	72.89328303	0.239780536	2102.739031	136.9	23:00:00
16/08/2016	23:52:55	16/08/2016 23:52	51.753628	-5.268926	bird 14	217.3979424	305	72.19547177	0.236706465	2036.734669	136.9	23:00:00
16/08/2016	23:58:00	16/08/2016 23:58	51.753113	-5.269562	bird 14	223.378905	309	66.67062861	0.215762552	1965.976916	133.1	23:00:00
17/08/2016	00:03:09	17/08/2016 00:03	51.752678	-5.270226	bird 14	218.5808894	304	48.86780685	0.160749365	1902.499923	133.1	0:00:00
17/08/2016	00:08:13	17/08/2016 00:08	51.752335	-5.270668	bird 14	206.0751047	305	26.02574911	0.085330325	1854.98943	138.6	0:00:00
17/08/2016	00:13:18	17/08/2016 00:13	51.752125	-5.270834	bird 14	182.9532152	305	28.07566276	0.092051353	1828.995145	138.6	0:00:00
17/08/2016	00:18:23	17/08/2016 00:18	51.751873	-5.270855	bird 14	157.1515193	305	23.06959731	0.075638024	1803.066628	139.3	0:00:00
17/08/2016	00:23:28	17/08/2016 00:23	51.751682	-5.270725	bird 14	154.9664987	305	14.00547556	0.045919592	1787.860511	139.3	0:00:00
17/08/2016	00:28:33	17/08/2016 00:28	51.751568	-5.270639	bird 14	79.90613711	314	17.18372008	0.054725223	1779.123124	137	0:00:00
17/08/2016	00:33:47	17/08/2016 00:33	51.751595	-5.270394	bird 14	109.0927129	314	13.29644551	0.042345368	1789.386882	137	0:00:00
17/08/2016	00:39:01	17/08/2016 00:39	51.751556	-5.270212	bird 14	47.14015849	311	13.26771695	0.042661469	1791.244163	138.7	0:00:00
17/08/2016	00:44:12	17/08/2016 00:44	51.751637	-5.270071	bird 14	39.28794837	311	36.69561566	0.117992333	1803.709407	138.7	0:00:00
17/08/2016	00:49:23	17/08/2016 00:49	51.751892	-5.269734	bird 14	33.38160807	313	31.07035976	0.099266325	1839.587116	137.3	0:00:00
17/08/2016	00:54:36	17/08/2016 00:54	51.752125	-5.269486	bird 14	42.07825173	314	45.17334021	0.143864141	1870.466055	137.3	0:00:00
17/08/2016	00:59:50	17/08/2016 00:59	51.752426	-5.269047	bird 14	41.21647753	315	43.53483071	0.138205812	1914.203745	136.9	0:00:00
17/08/2016	01:05:05	17/08/2016 01:05	51.75272	-5.268631	bird 14	30.86054071	318	74.70836028	0.234931951	1956.564118	139	1:00:00
17/08/2016	01:10:23	17/08/2016 01:10	51.753296	-5.268075	bird 14	39.43059174	325	86.95251068	0.267546187	2031.112442	139	1:00:00
17/08/2016	01:15:48	17/08/2016 01:15	51.753899	-5.267274	bird 14	52.85054921	341	83.78364265	0.245699832	2116.420274	135.4	1:00:00
17/08/2016	01:21:29	17/08/2016 01:21	51.754353	-5.266306	bird 14	45.57297086	384	108.5453201	0.282670104	2193.126028	135.4	1:00:00
17/08/2016	01:27:53	17/08/2016 01:27	51.755035	-5.265182	bird 14	39.95267928	419	148.0591135	0.353363039	2297.60356	133.9	1:00:00
17/08/2016	01:34:52	17/08/2016 01:34	51.756054	-5.263803	bird 14	40.77604251	462	171.6538174	0.371545059	2443.566916	133.9	1:00:00
17/08/2016	01:42:34	17/08/2016 01:42	51.757221	-5.262177	bird 14	51.15318663	475	176.954886	0.372536602	2612.676999	134.9	1:00:00
17/08/2016	01:50:29	17/08/2016 01:50	51.758217	-5.260179	bird 14	49.74830637	305	120.3738069	0.394668219	2779.876651	136	1:00:00
17/08/2016	01:55:34	17/08/2016 01:55	51.758915	-5.258847	bird 14	41.96207622	306	512.0408815	1.673336214	2895.106959	132.3	1:00:00
17/08/2016	02:00:40	17/08/2016 02:00	51.762333	-5.253881	bird 14	30.65692284	305	122.4382245	0.401436802	3401.716447	132.3	2:00:00
17/08/2016	02:10:48	17/08/2016 02:10	51.773212	-5.242165	bird 14	1.01151348	304	85.79724886	0.282227792	4855.20303	132.7	2:00:00
17/08/2016	02:15:52	17/08/2016 02:15	51.773983	-5.242143	bird 14	358.4938848	305	78.57900907	0.257636095	4926.889704	136.7	2:00:00
17/08/2016	02:20:57	17/08/2016 02:20	51.774689	-5.242173	bird 14	9.554978526	306	90.83332585	0.296840934	4991.017049	136.7	2:00:00
17/08/2016	22:01:03	17/08/2016 22:01	51.774105	-5.319859	bird 14	205.2352251	309	367.0835837	1.187972763	4850.542308	34.79	22:00:00
17/08/2016	22:06:12	17/08/2016 22:06	51.771122	-5.322131	bird 14	209.4848666	310	404.4060927	1.304535783	4664.272188	31.43	22:00:00
17/08/2016	22:11:22	17/08/2016 22:11	51.76796	-5.32502	bird 14	155.4255512	310	759.2321347	2.449135918	4512.720821	31.43	22:00:00
17/08/2016	22:37:31	17/08/2016 22:37	51.740753	-5.27852	bird 14	210.5415939	338	432.4086553	1.279315548	463.5913498	34.7	22:00:00
10/08/2016	02:00:17	10/08/2016 02:00	51.746601	-5.275497	bird 15	357.435564	299	580.3736146	1.941048878	1136.862753	321.1	2:00:00
10/08/2016	02:05:16	10/08/2016 02:05	51.751812	-5.275874	bird 15	339.3136265	298	155.2544574	0.520988112	1676.388088	320.1	2:00:00
10/08/2016	02:10:14	10/08/2016 02:10	51.753117	-5.27667	bird 15	294.4781771	298	78.04025312	0.261880044	1804.67574	320.1	2:00:00
10/08/2016	02:15:12	10/08/2016 02:15	51.753407	-5.277699	bird 15	345.8045669	298	217.9769198	0.731466174	1822.939454	318.8	2:00:00
10/08/2016	02:20:10	10/08/2016 02:20	51.755306	-5.278475	bird 15	357.5127338	298	209.4835548	0.702964949	2023.986223	318.8	2:00:00
10/08/2016	02:25:08	10/08/2016 02:25	51.757187	-5.278607	bird 15	347.709386	298	201.5784111	0.676437621	2230.626983	320	2:00:00
10/08/2016	02:30:06	10/08/2016 02:30	51.758957	-5.27923	bird 15	351.0850612	298	270.2003405	0.906712552	2422.392893	320	2:00:00
10/08/2016	02:35:04	10/08/2016 02:35	51.761356	-5.279838	bird 15	323.9000035	298	103.6461779	0.347805966	2685.489514	320.9	2:00:00
10/08/2016	02:40:02	10/08/2016 02:40	51.762108	-5.280724	bird 15	319.2141644	299	131.811768	0.440842034	2766.104622	320.9	2:00:00
10/08/2016	02:45:01	10/08/2016 02:45	51.763004	-5.281973	bird 15	238.195684	299	70.22090874	0.234852538	2863.985559	318.8	2:00:00
10/08/2016	02:50:00	10/08/2016 02:50	51.762672	-5.282838	bird 15	237.3097322	299	52.62704379	0.17601018	2827.417352	318.8	2:00:00
10/08/2016	02:54:59	10/08/2016 02:54	51.762417	-5.28348	bird 15	257.3698988	301	80.08290853	0.266056175	2800.146261	318.8	2:00:00
10/08/2016	03:00:00	10/08/2016 03:00	51.76226	-5.284612	bird 15	302.9272362	299	122.2177967	0.408755173	2786.320937	318.7	3:00:00
10/08/2016	03:04:59	10/08/2016 03:04	51.762856	-5.286099	bird 15	327.6050053	299	250.9455278	0.839282702	2860.344694	318.7	3:00:00
10/08/2016	03:09:58	10/08/2016 03:09	51.764759	-5.28805	bird 15	318.3351987	298	248.565044	0.834110886	3085.806315	320.6	3:00:00
10/08/2016	03:14:56	10/08/2016 03:14	51.766426	-5.290447	bird 15	231.2627767	299	100.4399793	0.335919663	3294.16764	320.6	3:00:00
10/08/2016	03:19:55	10/08/2016 03:19	51.765862	-5.291583	bird 15	229.5748781	300	163.2443514	0.544147838	3247.122967	319.8	3:00:00
10/08/2016	03:24:55	10/08/2016 03:24	51.764912	-5.293385	bird 15	319.1819029	299	427.7213693	1.430506252	3171.591194	319.8	3:00:00
10/08/2016	03:34:53	10/08/2016 03:34	51.776012	-5.305433	bird 15	282.7513935	302	88.94081026	0.294505994	4598.281377	321.4	3:00:00
10/08/2016	03:39:55	10/08/2016 03:39	51.776188	-5.30669	bird 15	194.4942167	301	144.7084083	0.480758831	4647.352224	323.6	3:00:00
10/08/2016	03:44:56	10/08/2016 03:44	51.774929	-5.307216	bird 15	198.0790724	300	171.9764353	0.573254784	4530.868096	323.6	3:00:00
10/08/2016	03:49:56	10/08/2016 03:49	51.77346	-5.307991	bird 15	193.0802887	301	148.1716152	0.492264502	4401.537615	322.7	3:00:00
10/08/2016	03:54:57	10/08/2016 03:54	51.772163	-5.308478	bird 15	205.8596923	303	217.4722043	0.717730047	4284.074357	322.7	3:00:00
10/08/2016	04:00:00	10/08/2016 04:00	51.770405	-5.309855	bird 15	203.8215125	300	223.7606154	0.745868718	4150.434127	316.2	4:00:00
10/08/2016	04:05:00	10/08/2016 04:05	51.768566	-5.311167	bird 15	205.4180155	300	246.3676526	0.821225509	4014.056084	316.2	4:00:00
10/08/2016	04:10:00	10/08/2016 04:10	51.766567	-5.312702	bird 15	204.8961504	302	264.4553239	0.87567988	3879.066503	316.1	4:00:00
10/08/2016	04:20:03	10/08/2016 04:20	51.766182	-5.325027	bird 15	248.6330533	299	413.1489036	1.381768908	4365.384903	320.6	4:00:00
10/08/2016	04:25:02	10/08/2016 04:25	51.764832	-5.330602	bird 15	182.0546039	301	228.5703509	0.759369937	4530.497901	318	4:00:00
10/08/2016	04:30:03	10/08/2016 04:30	51.762779	-5.330721	bird 15	187.9463758	303	242.1078596	0.79903584	4385.468979	318	4:00:00
10/08/2016	04:35:06	10/08/2016 04:35	51.760624	-5.331207	bird 15	194.244663	302	253.6152572	0.83978562	4260.812258	316.5	4:00:00
10/08/2016	04:40:08	10/08/2016 04:40	51.758415	-5.332113	bird 15	197.7462509	300	223.2992291	0.744330764	4166.956656	316.5	4:00:00
10/08/2016	04:45:08	10/08/2016 04:45	51.756504	-5.333101	bird 15	198.8737413	301	261.108124	0.867468851	4108.686807	315.8	4:00:00
10/08/2016	04:50:09	10/08/2016 04:50	51.754284	-5.334327	bird 15	193.0857011	301	271.1007148	0.900666826	4060.152102	315.8	4:00:00
10/08/2016	04:55:10	10/08/2016 04:55	51.751911	-5.335218	bird 15	190.7751672	304	295.5205934	0.972107215	3999.975307	318.2	4:00:00
10/08/2016	05:00:14	10/08/2016 05:00	51.749302	-5.33602	bird 15	183.6744999	312	320.3191814	1.026664043	3942.733779	318.2	5:00:00
10/08/2016	05:05:26	10/08/2016 05:05	51.746429	-5.336318	bird 15	183.7588562	312	341.5354904	1.094665033	3865.782252	313.5	5:00:00
10/08/2016	05:10:38	10/08/2016 05:10	51.743366	-5.336643	bird 15	238.3953868	311	672.5233695	2.162454564	3812.240855	313.5	5:00:00
10/08/2016	05:15:49	10/08/2016 05:15	51.740204	-5.344941	bird 15	191.7499246	310	493.3791656	1.591545695	4335.037292	302.1	5:00:00
10/08/2016	05:20:59	10/08/2016 05:20	51.735863	-5.346399	bird 15	174.1690991	311	335.7554099	1.079599389	4425.842818	302.1	5:00:00
10/08/2016	05:26:10	10/08/2016 05:26	51.732861	-5.345904	bird 15	175.4697088	311	338.521399	1.088493244	4416.245152	276.8	5:00:00
10/08/2016	05:31:21	10/08/2016 05:31	51.729828	-5.345516	bird 15	176.7831593	312	352.4805168	1.129745246	4439.980201	276.8	5:00:00
10/08/2016	05:36:33	10/08/2016 05:36	51.726665	-5.345229	bird 15	176.7527538	312	372.3276053	1.193357709	4499.637674	297.5	5:00:00
10/08/2016	05:41:45	10/08/2016 05:41	51.723324	-5.344923	bird 15	355.6158004	311	711.2772649	2.287065161	4591.063929	297.5	5:00:00
10/08/2016	05:46:56	10/08/2016 05:46	51.729698	-5.345712	bird 15	347.6746736	310	271.1977119	0.874831329	4455.950351	306.6	5:00:00
10/08/2016	05:52:06	10/08/2016 05:52	51.732079	-5.346552	bird 15	222.7343068	311	414.928177	1.334174203	4470.980564	306.6	5:00:00
10/08/2016	05:57:17	10/08/2016 05:57	51.729343	-5.350633	bird 15	172.7238303	319	362.4213077	1.136116952	4796.288469	303.1	5:00:00
10/08/2016	06:02:36	10/08/2016 06:02	51.726112	-5.349967	bird 15	128.2717459	313	347.2291398	1.109358274	4830.755134	303.1	6:00:00
10/08/2016	21:33:14	10/08/2016 21:33	51.753929	-5.264933	bird 15	72.11024477	302	79.14595116	0.262072686	2201.827925	281	21:00:00
10/08/2016	21:38:16	10/08/2016 21:38	51.754147	-5.263842	bird 15	86.85754972	304	85.47804854	0.281177791	2263.276034	279	21:00:00
10/08/2016	21:48:23	10/08/2016 21:48	51.744305	-5.27176	bird 15	219.0938558	300	462.0777888	1.540259296	1062.589178	267.6	21:00:00
10/08/2016	21:53:23	10/08/2016 21:53	51.741085	-5.275985	bird 15	332.8011915	322	160.4586431	0.498318768	602.6218893	267.6	21:00:00
10/08/2016	21:58:45	10/08/2016 21:58	51.742367	-5.277049	bird 15	22.80054915	341	206.8290252	0.606536731	669.4237145	262.3	21:00:00
10/08/2016	22:04:26	10/08/2016 22:04	51.74408	-5.275886	bird 15	65.40349179	379	156.1813184	0.412087911	874.120341	262.3	22:00:00
10/08/2016	22:10:45	10/08/2016 22:10	51.744663	-5.273829	bird 15	74.25982209	303	111.4197992	0.36772211	1004.647684	277.9	22:00:00
10/08/2016	22:15:48	10/08/2016 22:15	51.744934	-5.272276	bird 15	75.46081481	303	89.74666067	0.2961936	1092.750282	291	22:00:00
10/08/2016	22:20:51	10/08/2016 22:20	51.745136	-5.271018	bird 15	58.76719383	303	66.4306539	0.219243082	1165.530636	291	22:00:00
10/08/2016	22:25:54	10/08/2016 22:25	51.745445	-5.270195	bird 15	349.8615797	302	67.70885303	0.2242015	1228.865588	294	22:00:00
10/08/2016	22:30:56	10/08/2016 22:30	51.746044	-5.270368	bird 15	23.83666204	301	25.06804443	0.08328254	1271.402769	294	22:00:00
10/08/2016	22:35:57	10/08/2016 22:35	51.74625	-5.270221	bird 15	321.5414694	301	14.08070317	0.046779745	1295.507791	299.7	22:00:00
10/08/2016	22:45:58	10/08/2016 22:45	51.741829	-5.279574	bird 15	185.270874	300	268.5047376	0.895015792	539.7494796	302.9	22:00:00
10/08/2016	22:50:58	10/08/2016 22:50	51.739426	-5.279932	bird 15	358.9034314	300	298.7946121	0.99598204	286.9006314	302.9	22:00:00
10/08/2016	22:55:58	10/08/2016 22:55	51.742111	-5.280015	bird 15	190.7782073	305	132.6400163	0.434885299	560.6646298	303.9	22:00:00
10/08/2016	23:01:03	10/08/2016 23:01	51.74094	-5.280375	bird 15	196.8936331	313	418.8155489	1.338068846	428.6603818	303.9	23:00:00
11/08/2016	00:33:11	11/08/2016 00:33	51.741734	-5.283667	bird 16	167.1697477	1032	534.6791692	0.51809997	509.4413268	304.4	0:00:00
11/08/2016	03:07:23	11/08/2016 03:07	51.746582	-5.275199	bird 16	3.911519843	294	240.3335532	0.817461065	1143.384915	298.8	3:00:00
11/08/2016	03:12:17	11/08/2016 03:12	51.748737	-5.274961	bird 16	350.9298403	298	161.2432402	0.541084699	1370.454482	298.8	3:00:00
11/08/2016	03:22:14	11/08/2016 03:22	51.757923	-5.274052	bird 16	263.8142822	299	86.95172823	0.290808456	2365.854162	298.2	3:00:00
11/08/2016	03:27:13	11/08/2016 03:27	51.757839	-5.275304	bird 16	246.2535473	301	84.45199766	0.280571421	2337.851424	302.1	3:00:00
11/08/2016	03:32:14	11/08/2016 03:32	51.757534	-5.276424	bird 16	315.1576343	299	145.0230242	0.485026837	2290.087071	302.1	3:00:00
11/08/2016	03:37:13	11/08/2016 03:37	51.758457	-5.277907	bird 16	245.5031593	300	100.5694699	0.335231566	2376.503088	307.7	3:00:00
11/08/2016	03:42:13	11/08/2016 03:42	51.758083	-5.279233	bird 16	318.777317	298	124.397736	0.417442067	2325.543651	307.7	3:00:00
11/08/2016	03:47:11	11/08/2016 03:47	51.758923	-5.280422	bird 16	239.895675	298	105.1250367	0.352768579	2413.154997	300.2	3:00:00
11/08/2016	03:52:09	11/08/2016 03:52	51.75845	-5.28174	bird 16	240.2670504	300	124.5235269	0.415078423	2357.755131	300.2	3:00:00
11/08/2016	04:06:21	11/08/2016 04:06	51.757896	-5.283307	bird 16	356.4155239	1332	1360.08211	1.021082666	2297.315953	309.4	4:00:00
11/08/2016	04:28:33	11/08/2016 04:28	51.770096	-5.284542	bird 16	17.60460345	1464	3189.101	2.178347677	3656.211009	308.9	4:00:00
12/08/2016	22:14:16	12/08/2016 22:14	51.744244	-5.274886	bird 16	216.2020909	358	84.87373288	0.237077466	925.4226444	235.6	22:00:00
11/08/2016	02:24:44	11/08/2016 02:24	51.775673	-5.26004	bird 17	347.7489565	283	653.7250353	2.309982457	4535.971831	289.2	2:00:00
20/08/2016	22:13:07	20/08/2016 22:13	51.721363	-5.223958	bird 17	206.7967351	308	706.4896767	2.293797652	4380.714156	265.5	22:00:00
20/08/2016	22:18:15	20/08/2016 22:18	51.715698	-5.228576	bird 17	152.0010305	311	35.55527766	0.114325652	4400.63285	267.1	22:00:00
20/08/2016	22:23:26	20/08/2016 22:23	51.715416	-5.228334	bird 17	71.58312088	311	25.41579579	0.081722816	4431.730724	267.1	22:00:00
20/08/2016	22:28:37	20/08/2016 22:28	51.715488	-5.227985	bird 17	93.92882378	311	35.81493996	0.115160579	4447.497728	260.6	22:00:00
20/08/2016	22:33:48	20/08/2016 22:33	51.715466	-5.227468	bird 17	6.383575457	312	73.78143488	0.236478958	4478.741041	260.6	22:00:00
20/08/2016	22:54:28	20/08/2016 22:54	51.727482	-5.28121	bird 17	237.2808747	313	96.09697371	0.307019085	1087.902741	264.2	22:00:00
20/08/2016	22:59:41	20/08/2016 22:59	51.727016	-5.282381	bird 17	237.5031897	319	129.670119	0.406489401	1137.824963	263.4	22:00:00
20/08/2016	23:05:00	20/08/2016 23:05	51.726391	-5.283965	bird 17	221.8168635	315	179.6499943	0.570317442	1213.569787	263.4	23:00:00
20/08/2016	23:10:15	20/08/2016 23:10	51.725189	-5.285701	bird 17	227.9956112	342	130.8691949	0.382658465	1362.80984	265.7	23:00:00
20/08/2016	23:15:57	20/08/2016 23:15	51.724403	-5.28711	bird 17	199.5400094	310	204.0688168	0.658286506	1468.314052	268.9	23:00:00
20/08/2016	23:21:07	20/08/2016 23:21	51.722675	-5.2881	bird 17	196.8759267	310	129.9008017	0.419034844	1671.176048	268.9	23:00:00
20/08/2016	23:26:17	20/08/2016 23:26	51.721558	-5.288647	bird 17	203.3230006	309	158.6656999	0.51348123	1800.834259	267.4	23:00:00
20/08/2016	23:31:26	20/08/2016 23:31	51.720249	-5.289558	bird 17	231.0761416	309	268.5240787	0.869009963	1957.556131	267.4	23:00:00
20/08/2016	23:36:35	20/08/2016 23:36	51.718735	-5.292584	bird 17	315.916302	310	312.9683409	1.009575293	2180.013932	265.7	23:00:00
20/08/2016	23:41:45	20/08/2016 23:41	51.720753	-5.295739	bird 17	290.66799	307	706.2632579	2.300531785	2058.641747	265.7	23:00:00
20/08/2016	23:46:52	20/08/2016 23:46	51.722988	-5.305305	bird 17	162.8522887	310	181.6838505	0.586076937	2248.079387	270.4	23:00:00
20/08/2016	23:52:02	20/08/2016 23:52	51.721428	-5.304528	bird 17	126.1159387	311	228.0292175	0.733212918	2338.040819	270.4	23:00:00
20/08/2016	23:57:13	20/08/2016 23:57	51.720222	-5.30186	bird 17	128.106414	303	217.59427	0.718132904	2328.95236	272.2	23:00:00
21/08/2016	00:02:16	21/08/2016 00:02	51.719017	-5.29938	bird 17	118.0600196	290	203.3433546	0.701183981	2348.437225	272.2	0:00:00
21/08/2016	00:07:06	21/08/2016 00:07	51.718159	-5.296782	bird 17	115.0672122	290	218.9443391	0.75498048	2349.213925	274.5	0:00:00
21/08/2016	00:11:56	21/08/2016 00:11	51.717327	-5.293911	bird 17	110.8276144	287	224.8602932	0.783485342	2358.196028	274.5	0:00:00
21/08/2016	00:16:43	21/08/2016 00:16	51.71661	-5.290869	bird 17	108.7478349	288	219.6238837	0.76258293	2371.82739	272.9	0:00:00
21/08/2016	00:21:31	21/08/2016 00:21	51.715977	-5.287859	bird 17	87.53517949	289	197.2189454	0.682418496	2397.49765	272.9	0:00:00
21/08/2016	00:26:20	21/08/2016 00:26	51.716053	-5.285008	bird 17	112.5939676	290	212.4413226	0.732556285	2364.876434	273.1	0:00:00
21/08/2016	00:31:10	21/08/2016 00:31	51.715321	-5.282169	bird 17	101.0563356	294	206.4530715	0.702221332	2438.152769	273.1	0:00:00
21/08/2016	00:36:04	21/08/2016 00:36	51.714966	-5.279237	bird 17	103.4067727	289	190.9564056	0.660748808	2485.823331	273.3	0:00:00
21/08/2016	00:40:53	21/08/2016 00:40	51.714569	-5.276549	bird 17	82.95151531	289	180.0122588	0.622879788	2551.269511	273.3	0:00:00
21/08/2016	00:45:42	21/08/2016 00:45	51.714767	-5.273964	bird 17	90.6482219	290	187.0335162	0.644943159	2562.78551	272.6	0:00:00
21/08/2016	00:50:32	21/08/2016 00:50	51.714748	-5.271258	bird 17	63.32505029	289	171.6157689	0.59382619	2612.229202	272.6	0:00:00
21/08/2016	00:55:21	21/08/2016 00:55	51.715439	-5.269038	bird 17	91.80912062	292	215.3929204	0.737646988	2588.106261	270.5	0:00:00
21/08/2016	01:00:13	21/08/2016 01:00	51.715378	-5.265923	bird 17	92.72315558	296	152.565154	0.515422818	2676.7978	270.5	1:00:00
21/08/2016	01:05:09	21/08/2016 01:05	51.715313	-5.263718	bird 17	96.55006358	298	197.4947099	0.662733926	2750.149442	272.2	1:00:00
21/08/2016	01:10:07	21/08/2016 01:10	51.715111	-5.260879	bird 17	106.2337678	295	171.9347553	0.582829679	2865.05517	272.2	1:00:00
21/08/2016	01:15:02	21/08/2016 01:15	51.71468	-5.25849	bird 17	112.8436215	297	178.6481705	0.601508992	2992.718665	272.3	1:00:00
21/08/2016	01:19:59	21/08/2016 01:19	51.714058	-5.256107	bird 17	111.6514367	297	165.9180501	0.558646633	3141.743497	272.3	1:00:00
21/08/2016	01:24:56	21/08/2016 01:24	51.713509	-5.253875	bird 17	116.3149093	297	174.7904248	0.588519949	3280.950645	272.3	1:00:00
21/08/2016	01:29:53	21/08/2016 01:29	51.712814	-5.251607	bird 17	121.3926939	297	165.6306345	0.557678904	3436.838203	272.5	1:00:00
21/08/2016	01:34:50	21/08/2016 01:34	51.71204	-5.24956	bird 17	121.6421172	298	184.0048023	0.617465779	3591.715524	272.5	1:00:00
21/08/2016	01:39:48	21/08/2016 01:39	51.711174	-5.247292	bird 17	120.3652264	297	158.9928531	0.535329472	3765.063487	273	1:00:00
21/08/2016	01:44:45	21/08/2016 01:44	51.710453	-5.245306	bird 17	123.3436206	296	177.8388454	0.60080691	3914.460651	273	1:00:00
21/08/2016	01:49:41	21/08/2016 01:49	51.709576	-5.243155	bird 17	131.3156307	296	175.8577129	0.594113895	4085.098075	273.2	1:00:00
21/08/2016	01:54:37	21/08/2016 01:54	51.708534	-5.241242	bird 17	128.2395712	326	192.2852267	0.589831984	4259.127146	273.2	1:00:00
21/08/2016	02:00:03	21/08/2016 02:00	51.707466	-5.239055	bird 17	138.9119295	296	170.2476649	0.57516103	4448.01004	272.5	2:00:00
21/08/2016	02:04:59	21/08/2016 02:04	51.706314	-5.237434	bird 17	144.9315539	296	159.8642743	0.540082008	4617.950202	272.5	2:00:00
21/08/2016	02:09:55	21/08/2016 02:09	51.705139	-5.236103	bird 17	148.7743045	296	161.4486803	0.545434731	4776.506704	276.2	2:00:00
21/08/2016	02:14:51	21/08/2016 02:14	51.703899	-5.23489	bird 17	154.0986315	297	159.5099665	0.537070594	4935.191078	276.2	2:00:00
11/08/2016	02:08:11	11/08/2016 02:08	51.742481	-5.275558	bird 18	2.442496572	296	678.8763125	2.293501056	738.6439817	291	2:00:00
11/08/2016	02:27:47	11/08/2016 02:27	51.773186	-5.302972	bird 18	347.8839574	294	617.3123055	2.099701719	4245.025024	301.3	2:00:00
11/08/2016	02:32:41	11/08/2016 02:32	51.77861	-5.304854	bird 18	356.3253971	294	476.8581394	1.621966461	4857.143981	301.3	2:00:00
12/08/2016	00:19:55	12/08/2016 00:19	51.746628	-5.272872	bird 18	135.1202273	298	41.34925374	0.138755885	1223.659625	296.3	0:00:00
12/08/2016	00:24:53	12/08/2016 00:24	51.746365	-5.272449	bird 18	53.94337417	302	39.00696863	0.129162148	1214.62583	296.3	0:00:00
12/08/2016	00:29:55	12/08/2016 00:29	51.746571	-5.271992	bird 18	73.49107665	306	50.62976529	0.165456749	1251.148744	293.6	0:00:00
12/08/2016	00:35:01	12/08/2016 00:35	51.7467	-5.271289	bird 18	185.4896027	304	37.44557073	0.12317622	1290.531098	295.7	0:00:00
12/08/2016	00:40:05	12/08/2016 00:40	51.746365	-5.271341	bird 18	206.2061286	302	39.330741	0.130234242	1258.256769	295.7	0:00:00
12/08/2016	00:45:07	12/08/2016 00:45	51.746048	-5.271593	bird 18	258.2013813	301	320.1557921	1.063640505	1219.600483	292.1	0:00:00
12/08/2016	00:50:08	12/08/2016 00:50	51.745461	-5.276131	bird 18	226.5656454	297	266.5693733	0.897539977	1003.333959	292.1	0:00:00
12/08/2016	01:30:29	12/08/2016 01:30	51.763271	-5.288357	bird 18	171.216257	1664	2906.37309	1.746618443	2924.866704	271.7	1:00:00
12/08/2016	03:09:13	12/08/2016 03:09	51.743542	-5.273786	bird 19	334.2981736	298	305.7614616	1.026045173	907.0370123	270.7	3:00:00
12/08/2016	03:14:11	12/08/2016 03:14	51.746017	-5.27571	bird 19	327.4479078	297	272.1246362	0.916244566	1071.611221	270.7	3:00:00
12/08/2016	03:19:08	12/08/2016 03:19	51.748077	-5.277834	bird 19	329.0304111	297	241.7827243	0.814083247	1240.528117	276.5	3:00:00
12/08/2016	03:24:05	12/08/2016 03:24	51.749939	-5.279639	bird 19	319.3419471	296	222.8862487	0.752994084	1421.872853	276.5	3:00:00
12/08/2016	03:29:01	12/08/2016 03:29	51.751457	-5.281745	bird 19	308.7095787	296	193.7004673	0.65439347	1580.252215	282.4	3:00:00
12/08/2016	03:43:47	12/08/2016 03:43	51.764771	-5.301059	bird 19	302.3701723	295	655.2637977	2.221233212	3325.334752	288.5	3:00:00
12/08/2016	23:42:47	12/08/2016 23:42	51.740063	-5.261539	bird 19	45.82067036	302	179.2101333	0.593411037	1454.368058	237.1	23:00:00
12/08/2016	23:47:49	12/08/2016 23:47	51.741184	-5.259676	bird 19	358.5323015	303	177.5221448	0.585881666	1609.207924	237.6	23:00:00
12/08/2016	23:52:52	12/08/2016 23:52	51.742779	-5.259742	bird 19	29.63665458	304	137.312678	0.451686441	1661.962034	237.6	23:00:00
12/08/2016	23:57:56	12/08/2016 23:57	51.743851	-5.258757	bird 19	17.66992796	338	92.62208476	0.274029837	1771.136074	237.7	23:00:00
13/08/2016	00:03:34	13/08/2016 00:03	51.744644	-5.258349	bird 19	354.0595459	305	93.85584384	0.307724078	1834.525828	237.7	0:00:00
13/08/2016	00:08:39	13/08/2016 00:08	51.745483	-5.25849	bird 19	14.14165553	304	72.75626458	0.239329818	1869.717438	237.1	0:00:00
13/08/2016	00:13:43	13/08/2016 00:13	51.746117	-5.258232	bird 19	4.620479941	304	98.34354497	0.323498503	1920.447042	237.1	0:00:00
13/08/2016	00:18:47	13/08/2016 00:18	51.746998	-5.258117	bird 19	261.557403	302	689.5290114	2.283208647	1979.151778	236.2	0:00:00
13/08/2016	00:23:49	13/08/2016 00:23	51.74609	-5.267993	bird 19	101.8088957	304	43.60098372	0.143424289	1385.24192	236.2	0:00:00
13/08/2016	00:28:53	13/08/2016 00:28	51.74601	-5.267375	bird 19	8.653990759	304	47.15863334	0.155127083	1409.374973	236.5	0:00:00
13/08/2016	00:33:57	13/08/2016 00:33	51.746429	-5.267272	bird 19	73.09620809	303	20.71231518	0.068357476	1446.990166	236.5	0:00:00
13/08/2016	00:39:00	13/08/2016 00:39	51.746483	-5.266985	bird 19	146.7942341	303	27.94666082	0.092233204	1465.262074	236.5	0:00:00
13/08/2016	00:44:03	13/08/2016 00:44	51.746273	-5.266763	bird 19	256.0435376	302	156.7574996	0.519064568	1460.058676	236.5	0:00:00
13/08/2016	00:49:05	13/08/2016 00:49	51.745934	-5.268966	bird 19	62.03830031	303	67.05245534	0.221295232	1326.209102	236.2	0:00:00
13/08/2016	00:54:08	13/08/2016 00:54	51.746216	-5.268108	bird 19	129.7566257	303	142.8764	0.471539274	1389.693838	236.2	0:00:00
13/08/2016	00:59:11	13/08/2016 00:59	51.745396	-5.266516	bird 19	122.3502088	309	112.9049066	0.365388047	1407.812122	236.1	0:00:00
13/08/2016	01:04:20	13/08/2016 01:04	51.744854	-5.265134	bird 19	130.2150407	304	90.26065692	0.296910056	1445.853156	236.1	1:00:00
13/08/2016	01:09:24	13/08/2016 01:09	51.744331	-5.264135	bird 19	126.3929139	305	12.77307308	0.041878928	1470.230012	236.4	1:00:00
13/08/2016	01:14:29	13/08/2016 01:14	51.744263	-5.263986	bird 19	323.1427561	304	64.72096126	0.212897899	1474.891016	236.4	1:00:00
13/08/2016	01:19:33	13/08/2016 01:19	51.744728	-5.264549	bird 19	137.1794701	304	22.62876542	0.074436728	1470.74278	236.4	1:00:00
13/08/2016	01:24:37	13/08/2016 01:24	51.744579	-5.264326	bird 19	140.6496326	304	74.17662044	0.244002041	1474.207205	236.4	1:00:00
13/08/2016	01:34:42	13/08/2016 01:34	51.739017	-5.280435	bird 19	207.9596068	304	230.2680585	0.757460719	229.9935168	237	1:00:00
13/08/2016	03:34:53	13/08/2016 03:34	51.745506	-5.275809	bird 19	333.0772777	299	106.2504751	0.355352759	1017.23072	247.6	3:00:00
13/08/2016	03:39:52	13/08/2016 03:39	51.746357	-5.276507	bird 19	329.682542	299	141.7431557	0.474057377	1085.23607	247.5	3:00:00
13/08/2016	03:44:51	13/08/2016 03:44	51.747456	-5.277545	bird 19	319.4444957	299	274.5882813	0.918355456	1178.83239	247.5	3:00:00
13/08/2016	03:49:50	13/08/2016 03:49	51.749329	-5.280134	bird 19	315.7457673	299	169.691618	0.567530495	1350.625544	256.1	3:00:00
13/08/2016	03:54:49	13/08/2016 03:54	51.75042	-5.281851	bird 19	305.1544421	299	202.2864897	0.676543444	1464.837927	256.1	3:00:00
13/08/2016	03:59:48	13/08/2016 03:59	51.751465	-5.284248	bird 19	295.3692541	302	230.3170771	0.762639328	1587.365728	261.4	3:00:00
13/08/2016	04:04:50	13/08/2016 04:04	51.75235	-5.287263	bird 19	290.8027282	302	254.0332297	0.841169635	1715.566292	261.4	4:00:00
13/08/2016	04:09:52	13/08/2016 04:09	51.753159	-5.290703	bird 19	282.52044	302	241.3241096	0.799086456	1864.326071	260.8	4:00:00
13/08/2016	04:14:54	13/08/2016 04:14	51.753628	-5.294115	bird 19	313.4084399	302	437.9261634	1.450086634	1998.572509	260.8	4:00:00
13/08/2016	04:19:56	13/08/2016 04:19	51.756329	-5.298728	bird 19	283.7092595	302	299.8185148	0.992776539	2408.714768	261.5	4:00:00
13/08/2016	04:24:58	13/08/2016 04:24	51.756966	-5.302947	bird 19	76.23778163	325	386.3830938	1.188871058	2618.056075	261.5	4:00:00
13/08/2016	04:30:23	13/08/2016 04:30	51.75779	-5.297511	bird 19	297.9889895	327	770.2640719	2.35554762	2516.66171	265.6	4:00:00
13/08/2016	04:35:50	13/08/2016 04:35	51.761032	-5.307368	bird 19	281.057176	343	572.4339343	1.668903599	3162.987084	264.2	4:00:00
13/08/2016	04:41:33	13/08/2016 04:41	51.762016	-5.315506	bird 19	308.538634	377	257.2102412	0.682255282	3585.097732	264.2	4:00:00
13/08/2016	04:47:50	13/08/2016 04:47	51.763454	-5.318423	bird 19	312.7418615	302	187.9711791	0.622421123	3836.815628	265	4:00:00
13/08/2016	04:52:52	13/08/2016 04:52	51.764599	-5.320425	bird 19	318.1455391	301	158.0754267	0.52516753	4023.202685	265	4:00:00
13/08/2016	04:57:53	13/08/2016 04:57	51.765656	-5.321955	bird 19	323.7778272	307	161.6489193	0.526543711	4180.979325	272.6	4:00:00
13/08/2016	05:03:00	13/08/2016 05:03	51.766827	-5.323341	bird 19	331.1285422	301	155.1014018	0.515287049	4341.856376	272.6	5:00:00
13/08/2016	23:40:52	13/08/2016 23:40	51.779552	-5.303414	bird 19	132.0095944	307	132.0221069	0.430039436	4926.109362	296.4	23:00:00
13/08/2016	23:45:59	13/08/2016 23:45	51.778759	-5.301991	bird 19	138.6048522	306	125.1721466	0.409059302	4813.304787	299.3	23:00:00
13/08/2016	23:51:05	13/08/2016 23:51	51.777916	-5.30079	bird 19	144.8090226	307	124.8157805	0.40656606	4700.277417	299.3	23:00:00
14/08/2016	00:01:18	14/08/2016 00:01	51.764801	-5.289135	bird 19	109.2865631	303	109.3908304	0.361025843	3101.110398	302.9	0:00:00
14/08/2016	00:06:21	14/08/2016 00:06	51.764477	-5.287639	bird 19	103.5410567	306	98.12492994	0.320669706	3051.10061	300.3	0:00:00
14/08/2016	00:11:27	14/08/2016 00:11	51.764271	-5.286257	bird 19	101.5503813	307	106.3918593	0.346553288	3018.010881	300.3	0:00:00
14/08/2016	00:16:34	14/08/2016 00:16	51.76408	-5.284747	bird 19	100.8502986	307	88.28297369	0.28756669	2988.888655	298.8	0:00:00
14/08/2016	00:21:41	14/08/2016 00:21	51.763931	-5.283491	bird 19	100.738046	308	90.99072492	0.295424432	2968.435559	298.8	0:00:00
14/08/2016	00:26:49	14/08/2016 00:26	51.763779	-5.282196	bird 19	97.46508925	308	88.42528967	0.287095096	2950.13175	301.6	0:00:00
14/08/2016	00:31:57	14/08/2016 00:31	51.763676	-5.280926	bird 19	106.1982733	308	83.95469677	0.272580184	2939.916231	301.6	0:00:00
14/08/2016	00:37:05	14/08/2016 00:37	51.763466	-5.279758	bird 19	85.01116846	308	107.7622074	0.349877297	2920.033593	306.6	0:00:00
14/08/2016	00:42:13	14/08/2016 00:42	51.76355	-5.278203	bird 19	82.30225986	314	73.286234	0.23339565	2937.359824	306.6	0:00:00
14/08/2016	00:47:27	14/08/2016 00:47	51.763638	-5.277151	bird 19	83.45009774	314	119.3146816	0.379983062	2954.6856	306.4	0:00:00
14/08/2016	00:52:41	14/08/2016 00:52	51.76376	-5.275434	bird 19	92.23534505	314	120.0807024	0.382422619	2984.214827	306.4	0:00:00
14/08/2016	00:57:55	14/08/2016 00:57	51.763718	-5.273696	bird 19	90.26935978	317	94.72256876	0.298809365	3000.536709	309.6	0:00:00
14/08/2016	01:03:12	14/08/2016 01:03	51.763714	-5.272324	bird 19	109.7831736	311	61.61226781	0.198110186	3019.876518	309.6	1:00:00
14/08/2016	01:08:23	14/08/2016 01:08	51.763527	-5.271484	bird 19	155.412258	311	85.9333309	0.276312961	3013.203698	314.4	1:00:00
14/08/2016	01:18:41	14/08/2016 01:18	51.751244	-5.269742	bird 19	125.6208152	308	53.38961363	0.173342901	1775.860436	321.8	1:00:00
14/08/2016	01:23:49	14/08/2016 01:23	51.750965	-5.269113	bird 19	88.09550272	313	40.28320822	0.128700346	1770.322567	321.8	1:00:00
14/08/2016	01:29:02	14/08/2016 01:29	51.750977	-5.26853	bird 19	98.94795358	319	41.59345761	0.130387014	1792.168163	320	1:00:00
14/08/2016	01:34:21	14/08/2016 01:34	51.750919	-5.267935	bird 19	136.006749	324	158.8728593	0.490348331	1808.538514	320	1:00:00
12/08/2016	02:26:01	12/08/2016 02:26	51.759148	-5.291	bird 20	295.6122457	290	333.5208423	1.15007187	2509.988556	277.3	2:00:00
12/08/2016	02:35:41	12/08/2016 02:35	51.769173	-5.315564	bird 20	12.58285458	292	166.5761017	0.570466102	4229.338374	268.4	2:00:00
12/08/2016	02:40:33	12/08/2016 02:40	51.770634	-5.315037	bird 20	22.22416814	293	207.7690847	0.709109504	4347.580533	268.4	2:00:00
12/08/2016	02:45:26	12/08/2016 02:45	51.772362	-5.313896	bird 20	43.71355589	294	230.4164962	0.783729579	4473.876047	267.8	2:00:00
12/08/2016	02:50:20	12/08/2016 02:50	51.773857	-5.311586	bird 20	332.7610113	293	383.1406592	1.307647301	4546.63965	267.8	2:00:00
12/08/2016	02:55:13	12/08/2016 02:55	51.776917	-5.314132	bird 20	64.58468085	299	134.576521	0.450088699	4929.305939	268.7	2:00:00
12/08/2016	03:00:12	12/08/2016 03:00	51.777435	-5.31237	bird 20	70.73284385	310	121.3328691	0.391396352	4928.538822	268.7	3:00:00
12/08/2016	03:05:22	12/08/2016 03:05	51.777794	-5.31071	bird 20	68.9889535	314	98.59368989	0.313992643	4918.008949	270.7	3:00:00
12/08/2016	03:10:36	12/08/2016 03:10	51.778111	-5.309376	bird 20	103.1826458	311	127.1514437	0.408847086	4914.622676	270.7	3:00:00
14/08/2016	21:13:21	14/08/2016 21:13	51.773178	-5.319351	bird 20	186.9606747	304	207.3727662	0.682147257	4744.82974	50.43	21:00:00
14/08/2016	21:18:25	14/08/2016 21:18	51.771328	-5.319716	bird 20	187.9670763	305	225.0428666	0.737845464	4587.102705	68.12	21:00:00
14/08/2016	21:23:30	14/08/2016 21:23	51.769325	-5.320169	bird 20	188.5705137	305	234.7288733	0.769602863	4423.295854	68.12	21:00:00
14/08/2016	21:28:35	14/08/2016 21:28	51.767239	-5.320677	bird 20	157.3376158	302	551.2210282	1.825235193	4260.185744	61.02	21:00:00
14/08/2016	21:33:37	14/08/2016 21:33	51.762669	-5.317594	bird 20	193.2852042	303	269.1509932	0.888287106	3733.435644	61.02	21:00:00
14/08/2016	21:38:40	14/08/2016 21:38	51.760315	-5.318492	bird 20	197.5013642	304	297.3263159	0.978047092	3582.31031	71.52	21:00:00
14/08/2016	21:43:44	14/08/2016 21:43	51.757767	-5.31979	bird 20	195.6300156	303	295.8245196	0.976318547	3451.822874	71.52	21:00:00
14/08/2016	21:48:47	14/08/2016 21:48	51.755207	-5.320947	bird 20	189.4386711	304	264.6227412	0.870469543	3334.145182	76.74	21:00:00
14/08/2016	21:53:51	14/08/2016 21:53	51.752861	-5.321577	bird 20	192.8651676	305	344.3665096	1.129070523	3221.268857	76.74	21:00:00
14/08/2016	21:58:56	14/08/2016 21:58	51.749844	-5.32269	bird 20	187.7689331	309	374.0663098	1.210570582	3121.940009	72.8	21:00:00
14/08/2016	22:04:05	14/08/2016 22:04	51.746513	-5.323424	bird 20	187.3063458	306	403.0552802	1.317174118	3021.802403	72.8	22:00:00
14/08/2016	22:09:11	14/08/2016 22:09	51.74292	-5.324168	bird 20	187.970794	304	445.7056355	1.466136959	2960.072821	71.3	22:00:00
14/08/2016	22:14:15	14/08/2016 22:14	51.738953	-5.325065	bird 20	189.7710367	304	403.1958454	1.326302123	2960.069171	71.3	22:00:00
14/08/2016	22:19:19	14/08/2016 22:19	51.735382	-5.326058	bird 20	173.1877675	304	245.7419093	0.808361544	3029.598349	61.88	22:00:00
14/08/2016	22:24:23	14/08/2016 22:24	51.733189	-5.325635	bird 20	188.297295	305	232.0869142	0.760940702	3027.262355	61.88	22:00:00
14/08/2016	22:29:28	14/08/2016 22:29	51.731125	-5.326121	bird 20	172.7508515	308	355.5575723	1.154407702	3102.588454	67.85	22:00:00
14/08/2016	22:34:36	14/08/2016 22:34	51.727955	-5.32547	bird 20	157.8276535	306	320.0669381	1.045970386	3156.184768	67.85	22:00:00
14/08/2016	22:39:42	14/08/2016 22:39	51.725292	-5.323718	bird 20	167.2356948	308	547.8864016	1.778851953	3155.398368	69.76	22:00:00
14/08/2016	22:44:50	14/08/2016 22:44	51.72049	-5.321962	bird 20	163.0047929	310	556.7042041	1.795820013	3314.309535	69.76	22:00:00
14/08/2016	22:50:00	14/08/2016 22:50	51.715706	-5.319602	bird 20	157.5692138	311	520.9078564	1.674944876	3519.407588	72.18	22:00:00
14/08/2016	22:55:11	14/08/2016 22:55	51.71138	-5.31672	bird 20	155.6774178	312	519.9998038	1.666666038	3733.411807	81.5	22:00:00
14/08/2016	23:00:23	14/08/2016 23:00	51.707123	-5.313615	bird 20	150.3256099	307	402.3463419	1.310574404	3989.191805	81.5	23:00:00
14/08/2016	23:05:30	14/08/2016 23:05	51.703983	-5.310728	bird 20	140.3377626	312	415.5174509	1.331786702	4189.617648	89.7	23:00:00
14/08/2016	23:10:42	14/08/2016 23:10	51.701111	-5.306886	bird 20	141.8262504	313	452.3394855	1.445174075	4364.190734	89.7	23:00:00
14/08/2016	23:15:55	14/08/2016 23:15	51.697918	-5.302836	bird 20	153.8314904	316	409.2976906	1.295245856	4599.271559	86.9	23:00:00
14/08/2016	23:21:11	14/08/2016 23:21	51.694618	-5.30022	bird 20	326.4956803	321	357.0837815	1.112410534	4900.691689	86.9	23:00:00
14/08/2016	23:26:32	14/08/2016 23:26	51.697292	-5.303076	bird 20	150.8763076	325	402.9680564	1.239901712	4670.584932	88.3	23:00:00
14/08/2016	23:31:57	14/08/2016 23:31	51.69413	-5.300234	bird 20	153.2044107	324	374.8798421	1.15703655	4953.441116	88.3	23:00:00
15/08/2016	02:50:01	15/08/2016 02:50	51.754436	-5.278871	bird 20	74.32752936	306	227.0905106	0.742125852	1924.647525	120.4	2:00:00
15/08/2016	02:55:07	15/08/2016 02:55	51.754986	-5.275704	bird 20	40.30233269	307	389.3746357	1.268321289	2021.935398	120.2	2:00:00
15/08/2016	03:00:14	15/08/2016 03:00	51.757652	-5.272051	bird 20	53.94397502	305	176.2941929	0.578013747	2373.286705	120.2	3:00:00
15/08/2016	03:05:19	15/08/2016 03:05	51.758583	-5.269985	bird 20	49.19154136	303	223.7007359	0.738286257	2516.197589	119.4	3:00:00
17/08/2016	21:06:45	17/08/2016 21:06	51.76963	-5.284091	bird 20	211.3232386	342	289.8681506	0.847567692	3603.171322	41.08	21:00:00
17/08/2016	21:12:27	17/08/2016 21:12	51.767406	-5.286278	bird 20	217.6103194	406	362.9887549	0.894060973	3365.363279	41.08	21:00:00
17/08/2016	21:19:13	17/08/2016 21:19	51.764824	-5.289492	bird 20	220.0954265	311	287.7064344	0.925101075	3107.530936	43.41	21:00:00
17/08/2016	21:24:24	17/08/2016 21:24	51.762848	-5.29218	bird 20	225.4616417	329	339.2757767	1.031233364	2928.900657	43.41	21:00:00
17/08/2016	21:29:53	17/08/2016 21:29	51.760712	-5.295687	bird 20	228.5899862	402	448.5830081	1.11587813	2770.173688	41.75	21:00:00
17/08/2016	21:36:35	17/08/2016 21:36	51.758049	-5.300565	bird 20	227.438768	620	717.0220146	1.15648712	2637.122191	40.1	21:00:00
17/08/2016	21:46:55	17/08/2016 21:46	51.753696	-5.308222	bird 20	275.0280968	310	325.9393048	1.051417112	2561.876342	35.68	21:00:00
17/08/2016	22:19:24	17/08/2016 22:19	51.741501	-5.277712	bird 20	354.7685037	306	352.8443296	1.153086044	563.6439173	37.16	22:00:00
17/08/2016	22:24:30	17/08/2016 22:24	51.744659	-5.278179	bird 20	54.20919749	306	209.4435255	0.684455966	868.5928604	37.16	22:00:00
17/08/2016	22:29:36	17/08/2016 22:29	51.745758	-5.275717	bird 20	29.17929279	306	599.8285707	1.960224087	1045.269795	38.46	22:00:00
17/08/2016	22:34:42	17/08/2016 22:34	51.750462	-5.271474	bird 20	239.3377296	309	160.2221098	0.518518155	1643.41838	38.46	22:00:00
17/08/2016	22:39:51	17/08/2016 22:39	51.749729	-5.273471	bird 20	258.6802417	312	149.4394102	0.478972468	1511.436545	34.7	22:00:00
17/08/2016	22:45:03	17/08/2016 22:45	51.749466	-5.275593	bird 20	257.4122741	313	142.7803503	0.456167253	1431.976082	34.29	22:00:00
17/08/2016	22:55:24	17/08/2016 22:55	51.756424	-5.271964	bird 20	232.9729518	311	253.5351641	0.815225608	2244.975978	25.69	22:00:00
17/08/2016	23:05:42	17/08/2016 23:05	51.762661	-5.276163	bird 20	236.7548761	305	201.6870365	0.661268972	2855.866013	20.5	23:00:00
17/08/2016	23:10:47	17/08/2016 23:10	51.761669	-5.278608	bird 20	229.279028	308	245.6097518	0.797434259	2726.530148	20.5	23:00:00
17/08/2016	23:15:55	17/08/2016 23:15	51.760231	-5.281307	bird 20	231.9227823	309	235.8059279	0.76312598	2556.294543	13.82	23:00:00
17/08/2016	23:21:04	17/08/2016 23:21	51.758926	-5.283998	bird 20	230.450113	308	204.225591	0.663070101	2413.801281	13.82	23:00:00
17/08/2016	23:26:12	17/08/2016 23:26	51.757759	-5.286281	bird 20	236.7894711	308	226.6996376	0.736037785	2298.269254	9.88	23:00:00
17/08/2016	23:31:20	17/08/2016 23:31	51.756645	-5.28903	bird 20	239.0790927	308	239.0569215	0.776158836	2208.034204	9.88	23:00:00
17/08/2016	23:36:28	17/08/2016 23:36	51.755543	-5.292002	bird 20	234.2503777	308	251.0366663	0.815054111	2144.086026	10.36	23:00:00
17/08/2016	23:51:45	17/08/2016 23:51	51.770039	-5.299061	bird 20	183.596263	304	28.53981127	0.093880958	3827.19563	9.08	23:00:00
17/08/2016	23:56:49	17/08/2016 23:56	51.769783	-5.299087	bird 20	181.8390461	311	203.8280003	0.655395499	3800.634823	1.32	23:00:00
18/08/2016	00:02:00	18/08/2016 00:02	51.767952	-5.299182	bird 20	187.5879757	322	198.6840012	0.61703106	3609.498394	1.32	0:00:00
18/08/2016	00:07:22	18/08/2016 00:07	51.766182	-5.299563	bird 20	185.7624587	329	216.7282386	0.658748446	3433.00003	1.113	0:00:00
18/08/2016	00:12:51	18/08/2016 00:12	51.764244	-5.299879	bird 20	184.0702524	332	218.2948005	0.657514459	3240.049972	1.113	0:00:00
18/08/2016	00:18:23	18/08/2016 00:18	51.762287	-5.300104	bird 20	195.7590442	329	204.6653055	0.622082995	3045.801479	4.687	0:00:00
18/08/2016	00:23:52	18/08/2016 00:23	51.760517	-5.300911	bird 20	195.9694113	395	285.6741767	0.723225764	2891.374498	4.687	0:00:00
18/08/2016	00:30:27	18/08/2016 00:30	51.758049	-5.302052	bird 20	200.9492991	455	269.5784365	0.59248008	2687.794244	17.13	0:00:00
18/08/2016	00:38:02	18/08/2016 00:38	51.755787	-5.303451	bird 20	206.0755531	303	185.7744304	0.613116932	2529.241817	358.2	0:00:00
18/08/2016	00:43:05	18/08/2016 00:43	51.754288	-5.304636	bird 20	211.2090567	304	201.1254467	0.661596864	2446.113382	358.2	0:00:00
18/08/2016	00:48:09	18/08/2016 00:48	51.752743	-5.306148	bird 20	2.600639382	303	522.140119	1.723234716	2386.411475	5.617	0:00:00
18/08/2016	00:58:12	18/08/2016 00:58	51.766438	-5.299421	bird 20	172.4920605	310	114.3623324	0.36891075	3456.319223	14.61	0:00:00
18/08/2016	01:03:22	18/08/2016 01:03	51.765419	-5.299204	bird 20	174.7612858	305	117.6537754	0.385750083	3344.876847	14.61	1:00:00
18/08/2016	01:08:27	18/08/2016 01:08	51.764366	-5.299048	bird 20	172.9521293	305	93.16699614	0.305465561	3231.611182	23.46	1:00:00
18/08/2016	01:13:32	18/08/2016 01:13	51.763535	-5.298882	bird 20	163.2257724	303	94.0320679	0.310336858	3141.365741	23.46	1:00:00
20/08/2016	21:46:13	20/08/2016 21:46	51.741314	-5.276154	bird 20	222.6748258	312	618.4541948	1.982224983	612.9935259	269.1	21:00:00
12/08/2016	03:06:52	12/08/2016 03:06	51.755569	-5.280568	bird 21	334.3345895	290	632.3361481	2.180469476	2040.186847	270.7	3:00:00
12/08/2016	03:11:42	12/08/2016 03:11	51.760689	-5.284543	bird 21	309.5707265	290	417.7411668	1.440486782	2611.672675	270.7	3:00:00
12/08/2016	03:16:32	12/08/2016 03:16	51.763077	-5.289212	bird 21	217.4196895	290	162.1010179	0.558969027	2912.749092	276.5	3:00:00
12/08/2016	03:21:22	12/08/2016 03:21	51.761921	-5.290641	bird 21	309.2417483	290	266.7069738	0.91967922	2804.88751	276.5	3:00:00
12/08/2016	03:26:12	12/08/2016 03:26	51.763435	-5.293636	bird 21	294.7681742	291	355.5908689	1.221961749	3017.045166	282.4	3:00:00
12/08/2016	03:31:03	12/08/2016 03:31	51.764771	-5.298315	bird 21	285.7584727	291	217.6673291	0.747997694	3256.098946	282.4	3:00:00
12/08/2016	03:35:54	12/08/2016 03:35	51.765301	-5.30135	bird 21	230.1417483	293	166.5657973	0.56848395	3387.408458	288.5	3:00:00
12/08/2016	03:40:47	12/08/2016 03:40	51.764343	-5.303204	bird 21	298.4807487	290	205.9738691	0.710254721	3342.862576	288.5	3:00:00
17/08/2016	22:40:23	17/08/2016 22:40	51.770275	-5.327592	bird 21	188.2183037	303	324.6784183	1.071545935	4823.32699	34.7	22:00:00
17/08/2016	22:45:26	17/08/2016 22:45	51.767387	-5.328266	bird 21	192.0388161	302	343.7221451	1.138152798	4615.394919	34.29	22:00:00
17/08/2016	22:50:28	17/08/2016 22:50	51.764366	-5.329307	bird 21	191.1493484	303	382.8854985	1.26364851	4429.876517	34.29	22:00:00
17/08/2016	22:55:31	17/08/2016 22:55	51.76099	-5.330382	bird 21	194.4244854	304	421.6918547	1.387144259	4241.154986	25.69	22:00:00
17/08/2016	23:00:35	17/08/2016 23:00	51.75732	-5.331907	bird 21	197.0080408	296	435.4818705	1.471222535	4087.5601	25.69	23:00:00
17/08/2016	23:05:31	17/08/2016 23:05	51.753578	-5.333756	bird 21	192.0989121	296	481.8415019	1.627842912	3989.10646	20.5	23:00:00
17/08/2016	23:10:27	17/08/2016 23:10	51.749344	-5.335222	bird 21	198.3109623	296	504.8926502	1.705718413	3892.717972	20.5	23:00:00
17/08/2016	23:15:23	17/08/2016 23:15	51.745037	-5.337524	bird 21	194.0503559	296	586.4019164	1.981087555	3908.803467	13.82	23:00:00
17/08/2016	23:35:40	17/08/2016 23:35	51.744896	-5.270021	bird 21	121.2125191	321	599.8904215	1.868817512	1192.666383	10.36	23:00:00
17/08/2016	23:41:01	17/08/2016 23:41	51.742107	-5.262588	bird 21	274.6205564	361	888.5703245	2.461413641	1452.27221	10.36	23:00:00
14/08/2016	02:57:29	14/08/2016 02:57	51.741425	-5.27684	bird 22	18.97872898	306	92.38723318	0.301919063	591.7782912	359.4	2:00:00
14/08/2016	03:02:35	14/08/2016 03:02	51.74221	-5.276404	bird 22	10.91655547	309	133.155157	0.430922838	679.575799	359.4	3:00:00
14/08/2016	03:07:44	14/08/2016 03:07	51.743385	-5.276038	bird 22	18.72768748	308	408.8327464	1.327379047	802.3094795	352.8	3:00:00
14/08/2016	03:12:52	14/08/2016 03:12	51.746864	-5.274133	bird 22	8.985319378	308	151.2916827	0.491206762	1203.826845	352.8	3:00:00
14/08/2016	03:18:00	14/08/2016 03:18	51.748207	-5.27379	bird 22	334.6945988	308	71.90829292	0.233468484	1348.157191	357.9	3:00:00
14/08/2016	03:23:08	14/08/2016 03:23	51.748791	-5.274236	bird 22	300.4516732	308	64.44772734	0.209245868	1394.824461	357.9	3:00:00
14/08/2016	23:25:59	14/08/2016 23:25	51.773983	-5.321633	bird 22	142.2789513	309	116.0164475	0.375457759	4905.639094	88.3	23:00:00
14/08/2016	23:31:08	14/08/2016 23:31	51.773159	-5.320603	bird 22	145.5498992	309	108.1650497	0.350048705	4790.106185	88.3	23:00:00
14/08/2016	23:36:17	14/08/2016 23:36	51.772358	-5.319715	bird 22	141.7773575	309	92.00562783	0.297752841	4682.110476	94.2	23:00:00
14/08/2016	23:41:26	14/08/2016 23:41	51.771709	-5.318889	bird 22	145.7890194	309	51.84106064	0.167770423	4590.567271	94.2	23:00:00
14/08/2016	23:46:35	14/08/2016 23:46	51.771324	-5.318466	bird 22	138.2893228	309	68.7872754	0.222612542	4538.80511	102.2	23:00:00
14/08/2016	23:51:44	14/08/2016 23:51	51.770863	-5.317802	bird 22	121.5012101	309	33.4936612	0.108393726	4470.867555	102.2	23:00:00
14/08/2016	23:56:53	14/08/2016 23:56	51.770706	-5.317388	bird 22	106.8145773	310	45.49262525	0.146750404	4440.661984	104.1	23:00:00
15/08/2016	00:02:03	15/08/2016 00:02	51.770588	-5.316757	bird 22	67.61531974	305	34.55175525	0.113284443	4406.05359	104.1	0:00:00
15/08/2016	00:07:08	15/08/2016 00:07	51.770706	-5.316294	bird 22	65.84883231	305	40.60646385	0.133135947	4399.999592	105.6	0:00:00
15/08/2016	00:12:13	15/08/2016 00:12	51.770855	-5.315757	bird 22	53.82796185	305	40.409982	0.132491744	4394.454077	105.6	0:00:00
15/08/2016	00:17:18	15/08/2016 00:17	51.771069	-5.315284	bird 22	79.39478282	305	62.42656008	0.204677246	4397.739072	108.2	0:00:00
15/08/2016	00:22:23	15/08/2016 00:22	51.771172	-5.314395	bird 22	60.36523667	305	60.87309545	0.19958392	4376.198816	108.2	0:00:00
15/08/2016	00:27:28	15/08/2016 00:27	51.771442	-5.313628	bird 22	21.04420116	305	270.2303156	0.886001035	4375.731686	108.3	0:00:00
15/08/2016	00:32:33	15/08/2016 00:32	51.773708	-5.312219	bird 22	358.9136209	304	283.2156975	0.931630584	4551.44992	108.3	0:00:00
15/08/2016	00:37:37	15/08/2016 00:37	51.776253	-5.312297	bird 22	43.21041449	310	75.19846753	0.242575702	4807.533242	111.7	0:00:00
15/08/2016	00:42:47	15/08/2016 00:42	51.776745	-5.31155	bird 22	53.48954352	309	85.79255323	0.277645803	4835.209969	111.7	0:00:00
15/08/2016	00:47:56	15/08/2016 00:47	51.777203	-5.31055	bird 22	60.87492471	309	78.56479012	0.254254984	4853.39703	114.1	0:00:00
15/08/2016	00:53:05	15/08/2016 00:53	51.777546	-5.309555	bird 22	32.24365549	309	80.83118872	0.261589608	4861.366159	114.1	0:00:00
15/08/2016	00:58:14	15/08/2016 00:58	51.77816	-5.308929	bird 22	11.67877903	316	99.31025526	0.31427296	4908.030218	113.5	0:00:00
15/08/2016	01:03:30	15/08/2016 01:03	51.779034	-5.308637	bird 22	14.24199813	315	98.5063378	0.312718533	4990.864438	113.5	1:00:00
16/08/2016	22:32:55	16/08/2016 22:32	51.775726	-5.31963	bird 23	172.4197279	304	298.0209571	0.980332096	4995.587169	139.7	22:00:00
16/08/2016	22:37:59	16/08/2016 22:37	51.773071	-5.319059	bird 23	174.629964	305	314.1460882	1.029987175	4723.982524	140.9	22:00:00
16/08/2016	22:53:06	16/08/2016 22:53	51.750221	-5.297139	bird 23	263.2490886	303	317.7968664	1.048834543	1773.065348	146.3	22:00:00
16/08/2016	22:58:09	16/08/2016 22:58	51.749886	-5.301709	bird 23	245.6792742	319	423.3963112	1.327261164	1945.620357	144.9	22:00:00
16/08/2016	23:08:44	16/08/2016 23:08	51.746975	-5.293324	bird 23	103.2178674	325	801.6595163	2.466644666	1326.709143	139	23:00:00
16/08/2016	23:14:09	16/08/2016 23:14	51.745331	-5.282023	bird 23	272.3899645	322	72.23753723	0.224340178	898.8604744	139	23:00:00
16/08/2016	23:19:31	16/08/2016 23:19	51.745358	-5.283068	bird 23	121.1077329	323	357.2842057	1.106143052	903.9480725	138.8	23:00:00
16/08/2016	23:29:57	16/08/2016 23:29	51.742348	-5.266418	bird 23	288.1618669	305	9.302396295	0.03049966	1223.649846	134.7	23:00:00
16/08/2016	23:35:02	16/08/2016 23:35	51.742374	-5.266546	bird 23	213.6048486	304	109.628916	0.360621434	1217.197792	134.2	23:00:00
16/08/2016	23:40:06	16/08/2016 23:40	51.741554	-5.267426	bird 23	231.7059462	304	55.56686803	0.18278575	1122.183235	134.2	23:00:00
16/08/2016	23:45:10	16/08/2016 23:45	51.741245	-5.268058	bird 23	238.1039598	304	57.80402599	0.190144822	1068.241904	136.9	23:00:00
16/08/2016	23:50:14	16/08/2016 23:50	51.740971	-5.268769	bird 23	229.6135062	305	44.02534027	0.144345378	1011.076317	136.9	23:00:00
16/08/2016	23:55:19	16/08/2016 23:55	51.740715	-5.269255	bird 23	196.5723897	306	23.91844714	0.07816486	968.9701454	133.1	23:00:00
17/08/2016	00:00:25	17/08/2016 00:00	51.740509	-5.269354	bird 23	161.4795894	304	21.47870242	0.070653626	953.7797689	133.1	0:00:00
17/08/2016	00:05:29	17/08/2016 00:05	51.740326	-5.269255	bird 23	158.4762241	305	20.1002737	0.065902537	952.5905495	138.6	0:00:00
17/08/2016	00:10:34	17/08/2016 00:10	51.740158	-5.269148	bird 23	147.5279769	305	81.0354567	0.265690022	952.9671915	138.6	0:00:00
17/08/2016	00:15:39	17/08/2016 00:15	51.739544	-5.268517	bird 23	153.5400714	304	39.9147642	0.131298566	973.8644064	139.3	0:00:00
17/08/2016	00:20:43	17/08/2016 00:20	51.739223	-5.268259	bird 23	106.5301246	304	26.65459313	0.087679583	982.4321744	139.3	0:00:00
17/08/2016	00:25:47	17/08/2016 00:25	51.739155	-5.267889	bird 23	112.2917952	305	48.21005119	0.158065742	1005.66008	137	0:00:00
17/08/2016	00:30:52	17/08/2016 00:30	51.738991	-5.267243	bird 23	112.4192135	309	68.12360102	0.220464728	1045.652481	137	0:00:00
17/08/2016	00:36:01	17/08/2016 00:36	51.738758	-5.266331	bird 23	65.40001632	310	166.6073016	0.537442908	1103.187002	138.7	0:00:00
17/08/2016	00:41:11	17/08/2016 00:41	51.73938	-5.264137	bird 23	102.1662486	312	80.97104652	0.259522585	1263.835528	138.7	0:00:00
17/08/2016	00:46:23	17/08/2016 00:46	51.739227	-5.262991	bird 23	170.2279419	302	36.13084517	0.11963856	1338.527542	137.3	0:00:00
17/08/2016	00:51:25	17/08/2016 00:51	51.738907	-5.262902	bird 23	141.1469671	305	51.34299287	0.168337682	1339.213709	137.3	0:00:00
17/08/2016	00:56:30	17/08/2016 00:56	51.738548	-5.262435	bird 23	323.7246298	308	104.4315494	0.339063472	1366.277694	136.9	0:00:00
17/08/2016	01:01:38	17/08/2016 01:01	51.739304	-5.263331	bird 23	118.7283744	306	30.15199894	0.098535944	1316.898436	136.9	1:00:00
17/08/2016	01:06:44	17/08/2016 01:06	51.739174	-5.262948	bird 23	128.3890668	305	32.83953867	0.107670619	1340.494766	139	1:00:00
17/08/2016	01:52:25	17/08/2016 01:52	51.744221	-5.278308	bird 23	75.69359111	310	63.64216607	0.20529731	819.6083592	136	1:00:00
17/08/2016	01:57:35	17/08/2016 01:57	51.744362	-5.277415	bird 23	66.1535392	328	35.85447216	0.109312415	856.0135627	132.3	1:00:00
17/08/2016	02:03:03	17/08/2016 02:03	51.744492	-5.27694	bird 23	57.792889	377	60.44231254	0.160324436	882.2146154	132.3	2:00:00
17/08/2016	02:09:20	17/08/2016 02:09	51.744781	-5.276199	bird 23	64.62881255	303	35.90994945	0.118514685	932.9640446	132.7	2:00:00
17/08/2016	02:14:23	17/08/2016 02:14	51.744919	-5.275729	bird 23	50.5756226	304	24.74138939	0.081386149	961.2491888	132.7	2:00:00
17/08/2016	02:19:27	17/08/2016 02:19	51.74506	-5.275452	bird 23	62.68740681	305	36.20404464	0.118701786	984.0025166	136.7	2:00:00
17/08/2016	02:24:32	17/08/2016 02:24	51.745209	-5.274986	bird 23	66.09162843	305	47.0474513	0.154253939	1013.908956	136.7	2:00:00
17/08/2016	02:29:37	17/08/2016 02:29	51.74538	-5.274363	bird 23	108.5802437	304	30.44958987	0.100163125	1051.801047	137	2:00:00
17/08/2016	02:34:41	17/08/2016 02:34	51.745293	-5.273945	bird 23	89.99985198	304	26.03829973	0.085652302	1058.600847	137	2:00:00
17/08/2016	02:39:45	17/08/2016 02:39	51.745293	-5.273568	bird 23	102.5422637	304	39.54765456	0.130090969	1072.704003	138.9	2:00:00
17/08/2016	02:44:49	17/08/2016 02:44	51.745216	-5.273009	bird 23	262.3525686	303	290.7929961	0.959712858	1087.427454	138.9	2:00:00
14/08/2016	02:07:36	14/08/2016 02:07	51.743793	-5.274239	bird 24	3.792231295	294	88.5372756	0.301147196	909.6929298	353.2	2:00:00
14/08/2016	02:12:30	14/08/2016 02:12	51.744587	-5.274154	bird 24	10.28813095	294	91.03742645	0.30965111	985.020125	353.2	2:00:00
14/08/2016	02:17:24	14/08/2016 02:17	51.745392	-5.273918	bird 24	7.654363237	293	89.47759141	0.305384271	1068.905877	340.1	2:00:00
14/08/2016	02:22:17	14/08/2016 02:22	51.746189	-5.273745	bird 24	10.22403971	295	545.6623152	1.849702763	1150.907895	340.1	2:00:00
14/08/2016	02:27:12	14/08/2016 02:27	51.751015	-5.272339	bird 24	18.28282737	293	111.3473832	0.380025198	1673.670437	343.1	2:00:00
14/08/2016	02:32:05	14/08/2016 02:32	51.751965	-5.271832	bird 24	1.807921517	293	106.9769303	0.365108977	1784.430273	343.1	2:00:00
14/08/2016	02:36:58	14/08/2016 02:36	51.752926	-5.271783	bird 24	9.553668154	294	207.5047184	0.705798362	1884.184849	346	2:00:00
14/08/2016	02:41:52	14/08/2016 02:41	51.754765	-5.271283	bird 24	2.127001183	293	200.4116708	0.683998876	2086.940733	346	2:00:00
14/08/2016	02:46:45	14/08/2016 02:46	51.756565	-5.271175	bird 24	7.12211404	292	48.32904434	0.165510426	2277.338695	333.8	2:00:00
14/08/2016	02:51:37	14/08/2016 02:51	51.756996	-5.271088	bird 24	22.4907433	293	90.95303075	0.3104199	2324.552736	333.8	2:00:00
14/08/2016	02:56:30	14/08/2016 02:56	51.757751	-5.270583	bird 24	45.64459196	302	85.25814695	0.282311745	2415.267895	359.4	2:00:00
14/08/2016	03:01:32	14/08/2016 03:01	51.758286	-5.269699	bird 24	9.929184543	310	72.2965418	0.233214651	2491.798495	359.4	3:00:00
14/08/2016	03:06:42	14/08/2016 03:06	51.758926	-5.269518	bird 24	355.4512066	310	43.41868536	0.140060275	2562.930683	352.8	3:00:00
14/08/2016	03:11:52	14/08/2016 03:11	51.759315	-5.269568	bird 24	356.8843879	308	454.850654	1.476787838	2602.504115	352.8	3:00:00
14/08/2016	03:17:00	14/08/2016 03:17	51.763397	-5.269927	bird 24	48.65801727	308	80.46303727	0.261243627	3027.249525	357.9	3:00:00
14/08/2016	03:22:08	14/08/2016 03:22	51.763874	-5.269051	bird 24	30.40829225	312	109.8599855	0.352115338	3095.27617	357.9	3:00:00
14/08/2016	03:27:20	14/08/2016 03:27	51.764725	-5.268244	bird 24	2.979976772	309	307.2807769	0.994436171	3202.09083	323.4	3:00:00
14/08/2016	03:32:29	14/08/2016 03:32	51.767483	-5.268012	bird 24	44.97814313	310	105.0482926	0.33886546	3500.318259	323.4	3:00:00
14/08/2016	03:37:39	14/08/2016 03:37	51.76815	-5.266935	bird 24	346.1582058	311	74.83880152	0.240639233	3592.543131	2.021	3:00:00
14/08/2016	03:42:50	14/08/2016 03:42	51.768803	-5.267195	bird 24	7.770090829	311	94.21912066	0.302955372	3656.968401	2.021	3:00:00
14/08/2016	03:48:01	14/08/2016 03:48	51.769642	-5.26701	bird 24	21.33563659	310	67.39258463	0.217395434	3750.092547	0.642	3:00:00
14/08/2016	03:53:11	14/08/2016 03:53	51.770206	-5.266654	bird 24	19.54207693	310	54.56133996	0.176004322	3817.150988	0.642	3:00:00
14/08/2016	03:58:21	14/08/2016 03:58	51.770668	-5.266389	bird 24	345.5723644	312	607.9627304	1.948598495	3871.574466	346.9	3:00:00
14/08/2016	04:03:33	14/08/2016 04:03	51.775959	-5.268589	bird 24	42.24555059	308	93.596627	0.303885153	4404.749372	346.9	4:00:00
14/08/2016	04:08:41	14/08/2016 04:08	51.776581	-5.267676	bird 24	340.301908	307	530.3088692	1.727390453	4485.912083	336.4	4:00:00
15/08/2016	21:33:15	15/08/2016 21:33	51.758591	-5.275233	bird 24	191.2469988	1334	2362.168831	1.770741253	2420.762479	140.1	21:00:00
16/08/2016	04:39:32	16/08/2016 04:39	51.703705	-5.242929	bird 24	324.3674841	1981	4584.084048	2.314025264	4606.137441	128.6	4:00:00
16/08/2016	06:19:56	16/08/2016 06:19	51.752476	-5.271986	bird 24	201.825013	2294	1862.892217	0.812071586	1832.59693	124.8	6:00:00
01/06/2016	16:17:43	01/06/2016 16:17	51.745762	-5.276619	bird 25	202.4769811	942	1003.13414	1.064898238	1020.852227	14.32	16:00:00
02/06/2016	01:41:23	02/06/2016 01:41	51.756298	-5.2684	bird 25	8.730269789	2860	1877.063768	0.656316003	2320.606526	32.95	1:00:00
02/06/2016	02:29:03	02/06/2016 02:29	51.772972	-5.264262	bird 25	344.2977237	2049	1550.074856	0.756503102	4159.107712	37.35	2:00:00
17/07/2016	22:36:08	17/07/2016 22:36	51.7419	-5.27747	bird 27	321.6097	321	112.4754586	0.350390837	610.0195144	177.4	22:00:00
17/07/2016	22:41:29	17/07/2016 22:41	51.74269	-5.278486	bird 27	110.5914	724	157.0282898	0.216889903	656.0340012	177.4	22:00:00
17/07/2016	22:53:33	17/07/2016 22:53	51.7422	-5.276354	bird 27	304.1326	769	211.1106085	0.274526149	680.6914618	177.5	22:00:00
17/07/2016	23:06:22	17/07/2016 23:06	51.74326	-5.278889	bird 27	302.1715	303	130.098698	0.42936864	705.5608031	182.7	23:00:00
17/07/2016	23:11:25	17/07/2016 23:11	51.74388	-5.280486	bird 27	289.673	301	94.89141536	0.315253872	746.4739153	182.7	23:00:00
17/07/2016	23:16:26	17/07/2016 23:16	51.74417	-5.281778	bird 27	279.3665	301	102.1439105	0.33934854	770.1717566	178.9	23:00:00
17/07/2016	23:21:27	17/07/2016 23:21	51.74432	-5.283237	bird 27	290.6203	301	116.0532303	0.385558905	789.8427359	178.9	23:00:00
17/07/2016	23:26:28	17/07/2016 23:26	51.74469	-5.284808	bird 27	285.3353	302	110.8280754	0.366980382	847.2982974	184.6	23:00:00
17/07/2016	23:31:30	17/07/2016 23:31	51.74495	-5.286357	bird 27	282.7007	301	106.5401946	0.353954135	903.7622104	184.6	23:00:00
17/07/2016	23:36:31	17/07/2016 23:36	51.74516	-5.287862	bird 27	281.5062	301	102.2657301	0.339753256	963.2651619	187.9	23:00:00
17/07/2016	23:41:32	17/07/2016 23:41	51.74534	-5.289314	bird 27	253.6355	301	98.22830235	0.326339875	1025.631228	187.9	23:00:00
17/07/2016	23:46:33	17/07/2016 23:46	51.74509	-5.290678	bird 27	288.2558	300	58.59768919	0.195325631	1050.685045	193.4	23:00:00
17/07/2016	23:51:33	17/07/2016 23:51	51.74526	-5.291481	bird 27	243.3508	300	84.31523861	0.281050795	1097.784992	193.4	23:00:00
17/07/2016	23:56:33	17/07/2016 23:56	51.74492	-5.292572	bird 27	302.0643	303	139.1899792	0.459372869	1114.095221	193.1	23:00:00
18/07/2016	00:01:36	18/07/2016 00:01	51.74558	-5.294284	bird 27	290.3085	301	148.0869694	0.491983287	1246.844689	193.1	0:00:00
18/07/2016	00:06:37	18/07/2016 00:06	51.74604	-5.296296	bird 27	295.016	302	143.2911491	0.474474004	1379.269246	199.6	0:00:00
18/07/2016	00:11:39	18/07/2016 00:11	51.74659	-5.298172	bird 27	297.5272	299	388.4038958	1.299009685	1514.502053	199.6	0:00:00
18/07/2016	00:21:37	18/07/2016 00:21	51.74871	-5.314327	bird 27	190.4102	301	231.9212207	0.770502394	2554.954231	195.9	0:00:00
18/07/2016	00:26:38	18/07/2016 00:26	51.74666	-5.314935	bird 27	194.7388	303	248.5675173	0.820354843	2487.180615	202.5	0:00:00
18/07/2016	00:31:41	18/07/2016 00:31	51.7445	-5.315854	bird 27	222.0872	300	412.7598424	1.375866141	2455.770196	202.5	0:00:00
18/07/2016	00:36:41	18/07/2016 00:36	51.74175	-5.319865	bird 27	226.9952	300	722.0652627	2.406884209	2643.679445	204.3	0:00:00
18/07/2016	00:41:41	18/07/2016 00:41	51.73733	-5.327519	bird 27	173.9459	299	365.8787524	1.223674757	3123.037942	204.3	0:00:00
18/07/2016	00:46:40	18/07/2016 00:46	51.73406	-5.326959	bird 27	163.456	301	378.467055	1.257365631	3104.875494	204.4	0:00:00
18/07/2016	00:51:41	18/07/2016 00:51	51.7308	-5.325395	bird 27	161.4206	302	403.8065838	1.337107893	3062.101154	204.4	0:00:00
18/07/2016	00:56:43	18/07/2016 00:56	51.72736	-5.323532	bird 27	159.4302	305	420.8802146	1.37993513	3053.602576	188	0:00:00
18/07/2016	01:01:48	18/07/2016 01:01	51.72382	-5.321385	bird 27	155.8853	310	446.385425	1.439952984	3086.261258	188	1:00:00
18/07/2016	01:06:58	18/07/2016 01:06	51.72016	-5.318739	bird 27	159.7145	310	453.1920342	1.461909788	3155.193747	184.2	1:00:00
18/07/2016	01:12:08	18/07/2016 01:12	51.71634	-5.316463	bird 27	160.1111	316	454.5481161	1.438443405	3314.391272	184.2	1:00:00
18/07/2016	01:17:24	18/07/2016 01:17	51.7125	-5.314218	bird 27	159.2773	318	411.6660102	1.294547202	3527.983029	187.9	1:00:00
18/07/2016	01:22:42	18/07/2016 01:22	51.70904	-5.312108	bird 27	153.4527	327	347.3587116	1.062259057	3753.913739	187.9	1:00:00
18/07/2016	01:28:09	18/07/2016 01:28	51.70625	-5.309853	bird 27	153.5866	325	340.439828	1.047507163	3939.275055	180.5	1:00:00
18/07/2016	01:33:34	18/07/2016 01:33	51.70351	-5.307661	bird 27	134.6852	360	405.8011185	1.127225329	4142.228416	180.5	1:00:00
18/07/2016	01:39:34	18/07/2016 01:39	51.70095	-5.30348	bird 27	129.59	303	267.5204262	0.882905697	4294.915316	179.8	1:00:00
18/07/2016	01:44:37	18/07/2016 01:44	51.69942	-5.300495	bird 27	142.6119	303	159.4262552	0.526159258	4391.702442	179.8	1:00:00
18/07/2016	01:49:40	18/07/2016 01:49	51.69828	-5.299098	bird 27	176.1502	304	150.5466281	0.495219172	4487.289748	171.7	1:00:00
18/07/2016	01:54:44	18/07/2016 01:54	51.69693	-5.298951	bird 27	187.7901	305	157.224575	0.51549041	4629.871362	171.7	1:00:00
18/07/2016	01:59:49	18/07/2016 01:59	51.69553	-5.29926	bird 27	191.3213	307	171.3734927	0.558219846	4785.966623	165.8	1:00:00
18/07/2016	02:04:56	18/07/2016 02:04	51.69402	-5.299749	bird 27	197.0184	305	168.7144288	0.553162062	4957.010356	165.8	2:00:00
18/07/2016	22:57:33	18/07/2016 22:57	51.74369	-5.314441	bird 27	71.85845	1325	2770.548432	2.090979948	2334.922098	83.9	22:00:00
18/07/2016	23:19:38	18/07/2016 23:19	51.75142	-5.276307	bird 27	279.2551	306	169.1710707	0.552846636	1626.672001	71.92	23:00:00
18/07/2016	23:24:44	18/07/2016 23:24	51.75166	-5.278726	bird 27	298.1705	304	200.9185965	0.660916436	1619.960174	71.92	23:00:00
18/07/2016	23:29:48	18/07/2016 23:29	51.75251	-5.281293	bird 27	241.5627	306	122.2813756	0.399612338	1698.137931	96.7	23:00:00
18/07/2016	23:34:54	18/07/2016 23:34	51.75199	-5.282853	bird 27	244.2768	306	127.6071545	0.417016845	1639.937418	96.7	23:00:00
18/07/2016	23:40:00	18/07/2016 23:40	51.75149	-5.284516	bird 27	255.2936	306	133.8503506	0.437419447	1591.904103	115.8	23:00:00
18/07/2016	23:45:06	18/07/2016 23:45	51.75119	-5.286393	bird 27	161.4864	305	119.6533155	0.392305953	1577.384861	122.4	23:00:00
18/07/2016	23:50:11	18/07/2016 23:50	51.75017	-5.285844	bird 27	264.9255	306	66.80559281	0.218318931	1459.029681	122.4	23:00:00
18/07/2016	23:55:17	18/07/2016 23:55	51.75012	-5.286808	bird 27	140.1589	307	293.1364538	0.954841869	1466.576284	128.2	23:00:00
19/07/2016	00:00:24	19/07/2016 00:00	51.7481	-5.284083	bird 27	257.787	306	76.56713417	0.250219393	1213.907045	128.2	0:00:00
19/07/2016	00:05:30	19/07/2016 00:05	51.74795	-5.285165	bird 27	298.2442	307	69.5804044	0.226646268	1207.814594	132.2	0:00:00
19/07/2016	00:10:37	19/07/2016 00:10	51.74825	-5.286049	bird 27	296.4471	307	65.69171424	0.213979525	1252.265194	132.2	0:00:00
19/07/2016	00:15:44	19/07/2016 00:15	51.74851	-5.286903	bird 27	296.6888	306	75.96273602	0.248244235	1294.079932	129.5	0:00:00
19/07/2016	00:20:50	19/07/2016 00:20	51.74882	-5.287883	bird 27	309.8434	307	78.36948409	0.255275192	1345.635696	129.5	0:00:00
19/07/2016	00:25:57	19/07/2016 00:25	51.74927	-5.288756	bird 27	297.2345	307	84.18536938	0.274219444	1411.717701	131	0:00:00
19/07/2016	00:31:04	19/07/2016 00:31	51.74961	-5.289845	bird 27	311.8199	307	81.6947594	0.266106708	1472.793175	131	0:00:00
19/07/2016	00:36:11	19/07/2016 00:36	51.7501	-5.290726	bird 27	80.14086	307	325.7732117	1.061150527	1545.865517	132	0:00:00
19/07/2016	00:41:18	19/07/2016 00:41	51.7506	-5.286078	bird 27	21.38276	305	126.5890804	0.415046165	1508.932994	132	0:00:00
19/07/2016	00:46:23	19/07/2016 00:46	51.75166	-5.285412	bird 27	259.4837	306	100.3439044	0.327921256	1618.072972	132.8	0:00:00
19/07/2016	00:51:29	19/07/2016 00:51	51.75149	-5.286839	bird 27	270.5246	307	85.36250697	0.278053769	1616.014979	132.8	0:00:00
19/07/2016	00:56:36	19/07/2016 00:56	51.7515	-5.288075	bird 27	309.8081	308	59.17860929	0.192138342	1636.163935	137.8	0:00:00
19/07/2016	01:01:44	19/07/2016 01:01	51.75184	-5.288734	bird 27	44.62598	305	151.7595522	0.497572302	1684.418993	137.8	1:00:00
19/07/2016	01:06:49	19/07/2016 01:06	51.75281	-5.287189	bird 27	273.3653	306	72.23129981	0.236049999	1764.659252	135.9	1:00:00
19/07/2016	01:11:55	19/07/2016 01:11	51.75285	-5.288233	bird 27	261.6583	307	46.88310284	0.15271369	1784.466466	135.9	1:00:00
19/07/2016	01:17:02	19/07/2016 01:17	51.75279	-5.288905	bird 27	281.9861	324	71.36539012	0.22026355	1789.416279	132.1	1:00:00
19/07/2016	01:22:26	19/07/2016 01:22	51.75292	-5.289917	bird 27	313.165	398	83.49651054	0.209790227	1822.55179	132.1	1:00:00
19/07/2016	01:29:04	19/07/2016 01:29	51.75343	-5.290804	bird 27	307.5286	590	170.2587831	0.288574209	1895.11701	124.3	1:00:00
19/07/2016	01:38:54	19/07/2016 01:38	51.75436	-5.292762	bird 27	311.8801	307	78.35365954	0.255223647	2037.847044	114.9	1:00:00
19/07/2016	01:44:01	19/07/2016 01:44	51.75483	-5.293607	bird 27	318.6361	307	114.0842136	0.371609816	2107.770694	114.9	1:00:00
19/07/2016	01:49:08	19/07/2016 01:49	51.7556	-5.294698	bird 27	355.4721	305	52.45733812	0.171991273	2215.574715	111.4	1:00:00
19/07/2016	01:54:13	19/07/2016 01:54	51.75607	-5.294758	bird 27	321.8413	304	96.47915411	0.317365639	2265.37792	111.4	1:00:00
19/07/2016	01:59:17	19/07/2016 01:59	51.75675	-5.295625	bird 27	312.0303	308	104.4771338	0.339211473	2358.219831	110.8	1:00:00
19/07/2016	02:04:25	19/07/2016 02:04	51.75738	-5.296747	bird 27	319.6769	315	120.2284251	0.38167754	2453.372564	110.8	2:00:00
19/07/2016	02:09:40	19/07/2016 02:09	51.7582	-5.297881	bird 27	356.9722	316	62.39160004	0.197441772	2568.734065	108.8	2:00:00
19/07/2016	02:14:56	19/07/2016 02:14	51.75876	-5.297928	bird 27	298.3602	314	679.266513	2.16326915	2626.673869	108.8	2:00:00
19/07/2016	02:20:10	19/07/2016 02:20	51.76165	-5.306594	bird 27	23.78364	313	93.68274189	0.299305885	3192.271204	111.6	2:00:00
19/07/2016	02:25:23	19/07/2016 02:25	51.76242	-5.306045	bird 27	354.7817	341	84.91257239	0.249010476	3246.04942	109.6	2:00:00
19/07/2016	02:31:04	19/07/2016 02:31	51.76318	-5.306157	bird 27	12.61098	344	116.297189	0.338073224	3323.013767	109.6	2:00:00
19/07/2016	02:36:48	19/07/2016 02:36	51.7642	-5.305789	bird 27	351.5074	307	70.87674764	0.230868885	3409.733064	109.2	2:00:00
19/07/2016	02:41:55	19/07/2016 02:41	51.76483	-5.305941	bird 27	350.3009	307	112.8943072	0.3677339	3476.374524	109.2	2:00:00
19/07/2016	02:47:02	19/07/2016 02:47	51.76583	-5.306218	bird 27	1.796438	306	90.16739108	0.294664677	3583.620122	111.1	2:00:00
19/07/2016	02:52:08	19/07/2016 02:52	51.76664	-5.306177	bird 27	345.1664	307	105.9316786	0.345054328	3662.453323	111.1	2:00:00
19/07/2016	02:57:15	19/07/2016 02:57	51.76756	-5.306572	bird 27	332.466	312	85.34313341	0.273535684	3766.069465	113.5	2:00:00
19/07/2016	03:02:27	19/07/2016 03:02	51.76824	-5.307144	bird 27	359.6689	307	166.8972379	0.543639211	3851.300882	113.5	3:00:00
19/07/2016	03:07:34	19/07/2016 03:07	51.76974	-5.307158	bird 27	348.246	305	194.3698796	0.637278294	4001.642811	116.5	3:00:00
19/07/2016	03:12:39	19/07/2016 03:12	51.77145	-5.307734	bird 27	359.327	303	182.4839026	0.602257104	4190.601006	116.5	3:00:00
04/08/2016	02:49:19	04/08/2016 02:49	51.74944	-5.26797	bird 28	15.33057	847	853.8573577	1.008096054	1671.277592	270.9	2:00:00
04/08/2016	03:03:26	04/08/2016 03:03	51.75684	-5.264694	bird 28	13.57673	823	220.9418744	0.268459143	2488.540708	265.1	3:00:00
04/08/2016	03:17:09	04/08/2016 03:17	51.75877	-5.263941	bird 28	15.50888	704	224.0893929	0.318308797	2702.087859	264.3	3:00:00
05/08/2016	22:26:30	05/08/2016 22:26	51.75786	-5.278178	bird 28	238.7252	308	172.5612818	0.560263902	2308.348598	235.9	22:00:00
05/08/2016	22:31:38	05/08/2016 22:31	51.75706	-5.280319	bird 28	242.4255	309	175.4343735	0.567748782	2206.676538	235.9	22:00:00
05/08/2016	22:36:47	05/08/2016 22:36	51.75633	-5.282571	bird 28	156.9856	308	506.7565596	1.645313505	2122.023712	242.4	22:00:00
18/07/2016	01:17:03	18/07/2016 01:17	51.74508	-5.276107	bird 29	8.22448	330	580.1052558	1.757894714	965.6448701	187.9	1:00:00
18/07/2016	01:22:33	18/07/2016 01:22	51.75024	-5.274903	bird 29	288.5835	309	184.5334989	0.597195789	1528.746232	187.9	1:00:00
18/07/2016	01:27:42	18/07/2016 01:27	51.75077	-5.277435	bird 29	355.3616	313	78.14254087	0.24965668	1538.464246	180.5	1:00:00
18/07/2016	01:32:55	18/07/2016 01:32	51.75147	-5.277527	bird 29	339.5609	313	374.1588286	1.195395618	1613.354457	180.5	1:00:00
18/07/2016	01:38:08	18/07/2016 01:38	51.75462	-5.279424	bird 29	8.044324	327	49.44018335	0.151193221	1940.894952	179.8	1:00:00
18/07/2016	01:43:35	18/07/2016 01:43	51.75506	-5.279324	bird 29	15.18162	335	66.90972694	0.199730528	1990.259332	179.8	1:00:00
18/07/2016	01:49:10	18/07/2016 01:49	51.75564	-5.279068	bird 29	6.778767	337	92.99840068	0.275959646	2056.202766	171.7	1:00:00
18/07/2016	01:54:47	18/07/2016 01:54	51.75647	-5.278909	bird 29	35.94316	378	133.3783482	0.352852773	2149.132318	171.7	1:00:00
18/07/2016	02:01:05	18/07/2016 02:01	51.75744	-5.277774	bird 29	22.25218	379	727.5136477	1.919561076	2265.528653	165.8	2:00:00
18/07/2016	02:07:24	18/07/2016 02:07	51.76349	-5.273777	bird 29	101.1592	305	48.54317776	0.15915796	2974.584342	174	2:00:00
18/07/2016	02:12:29	18/07/2016 02:12	51.7634	-5.273089	bird 29	61.94656	305	229.0301009	0.750918364	2974.355465	174	2:00:00
18/07/2016	02:17:34	18/07/2016 02:17	51.76437	-5.270163	bird 29	37.53986	306	74.86100654	0.244643812	3126.978414	177.9	2:00:00
18/07/2016	02:22:40	18/07/2016 02:22	51.7649	-5.269495	bird 29	22.95116	307	132.9447821	0.433044893	3196.095746	177.9	2:00:00
18/07/2016	02:27:47	18/07/2016 02:27	51.766	-5.268743	bird 29	19.92314	307	147.8805335	0.481695549	3327.931866	176.5	2:00:00
18/07/2016	02:32:54	18/07/2016 02:32	51.76725	-5.268015	bird 29	11.98212	308	141.094275	0.458098296	3475.383958	176.5	2:00:00
18/07/2016	02:38:02	18/07/2016 02:38	51.76849	-5.267587	bird 29	4.296307	307	143.9326386	0.468835956	3616.007838	176.7	2:00:00
18/07/2016	02:43:09	18/07/2016 02:43	51.76978	-5.267431	bird 29	16.20614	308	165.7689609	0.538210912	3756.906841	176.7	2:00:00
18/07/2016	02:48:17	18/07/2016 02:48	51.77121	-5.266757	bird 29	8.711025	307	154.1950832	0.502264115	3922.532384	171.2	2:00:00
18/07/2016	02:53:24	18/07/2016 02:53	51.77258	-5.26642	bird 29	4.736186	308	157.4281009	0.511130198	4075.50647	171.2	2:00:00
18/07/2016	02:58:32	18/07/2016 02:58	51.77399	-5.26623	bird 29	16.08088	310	172.4871986	0.556410318	4230.219316	163	2:00:00
18/07/2016	03:03:42	18/07/2016 03:03	51.77548	-5.26554	bird 29	11.51584	304	177.1865416	0.582850466	4402.544117	163	3:00:00
18/07/2016	03:08:46	18/07/2016 03:08	51.77704	-5.265024	bird 29	25.37833	304	158.8448872	0.522516076	4579.285116	155.5	3:00:00
18/07/2016	03:13:50	18/07/2016 03:13	51.77833	-5.264038	bird 29	14.18591	302	160.6929609	0.532095897	4735.450941	155.5	3:00:00
18/07/2016	03:18:52	18/07/2016 03:18	51.77973	-5.263466	bird 29	5.291333	302	167.6155811	0.555018481	4895.991962	156.9	3:00:00
19/07/2016	21:43:14	19/07/2016 21:43	51.77244	-5.300319	bird 29	181.0833	402	666.5848924	1.658171374	4107.853554	150.7	21:00:00
19/07/2016	21:49:56	19/07/2016 21:49	51.76645	-5.300502	bird 29	215.2639	446	437.6971937	0.981383842	3483.837428	204.9	21:00:00
19/07/2016	21:57:22	19/07/2016 21:57	51.76324	-5.304167	bird 29	222.5383	491	518.7427	1.056502444	3263.005054	209.9	21:00:00
22/07/2016	02:25:44	22/07/2016 02:25	51.74514	-5.276309	bird 30	49.2151	294	283.0742548	0.962837601	965.7768234	155.7	2:00:00
22/07/2016	02:30:38	22/07/2016 02:30	51.7468	-5.273203	bird 30	71.70794	291	103.0464377	0.35411147	1228.396462	155.7	2:00:00
22/07/2016	02:35:29	22/07/2016 02:35	51.74709	-5.271786	bird 30	4.512381	292	62.49968253	0.214040009	1307.066988	154.9	2:00:00
22/07/2016	02:40:21	22/07/2016 02:40	51.74765	-5.271715	bird 30	29.42649	292	108.8049765	0.372619782	1362.204351	154.9	2:00:00
22/07/2016	02:45:13	22/07/2016 02:45	51.7485	-5.270936	bird 30	61.09913	292	324.7336735	1.112101622	1470.792392	158.8	2:00:00
22/07/2016	02:50:05	22/07/2016 02:50	51.74991	-5.266819	bird 30	58.32676	291	42.30544349	0.145379531	1760.334037	158.8	2:00:00
22/07/2016	02:54:56	22/07/2016 02:54	51.75011	-5.266298	bird 30	69.57133	292	149.8850622	0.513305008	1799.715967	158.8	2:00:00
22/07/2016	02:59:48	22/07/2016 02:59	51.75058	-5.264264	bird 30	56.69312	307	80.16135247	0.261111897	1927.893458	158.7	2:00:00
22/07/2016	03:04:55	22/07/2016 03:04	51.75097	-5.263288	bird 30	45.53706	314	97.02369684	0.308992665	2004.338528	158.7	3:00:00
22/07/2016	03:10:09	22/07/2016 03:10	51.75158	-5.262284	bird 30	38.89161	314	80.19025017	0.255382962	2100.809165	158	3:00:00
22/07/2016	03:15:23	22/07/2016 03:15	51.75214	-5.261553	bird 30	22.48692	315	80.60517863	0.255889456	2180.833883	161.6	3:00:00
22/07/2016	03:20:38	22/07/2016 03:20	51.75281	-5.261109	bird 30	20.45962	315	71.26028069	0.226223113	2257.429405	161.6	3:00:00
22/07/2016	03:25:53	22/07/2016 03:25	51.75341	-5.260748	bird 30	30.39485	341	103.2948703	0.302917508	2324.647724	159.9	3:00:00
22/07/2016	03:31:34	22/07/2016 03:31	51.75421	-5.259989	bird 30	33.32846	312	81.29333923	0.260555574	2426.608156	159.9	3:00:00
22/07/2016	03:36:46	22/07/2016 03:36	51.75482	-5.259341	bird 30	25.32907	312	96.19713983	0.308324166	2507.404311	158.6	3:00:00
22/07/2016	03:41:58	22/07/2016 03:41	51.7556	-5.25874	bird 30	62.92438	311	188.0306339	0.604600109	2601.007399	158.6	3:00:00
22/07/2016	03:47:09	22/07/2016 03:47	51.75637	-5.256316	bird 30	4.027633	313	131.6156553	0.420497301	2772.739047	159.5	3:00:00
22/07/2016	03:52:22	22/07/2016 03:52	51.75755	-5.256182	bird 30	18.374	312	102.0717977	0.327153198	2880.297613	159.5	3:00:00
22/07/2016	03:57:34	22/07/2016 03:57	51.75842	-5.255713	bird 30	31.08739	309	120.8069905	0.390961134	2976.36416	157.6	3:00:00
22/07/2016	04:02:43	22/07/2016 04:02	51.75935	-5.25481	bird 30	29.2411	297	125.1610289	0.421417606	3096.216193	157.6	4:00:00
22/07/2016	04:07:40	22/07/2016 04:07	51.76033	-5.25392	bird 30	29.68277	297	128.1178927	0.431373376	3220.014929	157.7	4:00:00
22/07/2016	04:12:37	22/07/2016 04:12	51.76133	-5.253	bird 30	21.17105	298	157.550416	0.528692671	3346.920513	157.7	4:00:00
22/07/2016	04:17:35	22/07/2016 04:17	51.76265	-5.252174	bird 30	22.13116	297	117.702076	0.396303286	3498.706946	160.3	4:00:00
22/07/2016	04:22:32	22/07/2016 04:22	51.76363	-5.251532	bird 30	18.72161	298	104.6205885	0.3510758	3612.862013	160.3	4:00:00
22/07/2016	04:27:30	22/07/2016 04:27	51.76452	-5.251043	bird 30	17.40636	298	88.659423	0.297514842	3712.979071	163.5	4:00:00
22/07/2016	04:32:28	22/07/2016 04:32	51.76528	-5.250657	bird 30	25.52267	298	96.19314389	0.322795785	3797.418148	163.5	4:00:00
22/07/2016	04:37:26	22/07/2016 04:37	51.76606	-5.250056	bird 30	31.8556	300	97.00485231	0.323349508	3892.261153	165.3	4:00:00
22/07/2016	04:42:26	22/07/2016 04:42	51.7668	-5.249313	bird 30	30.10076	298	83.58359868	0.280481875	3989.027406	165.3	4:00:00
22/07/2016	04:47:24	22/07/2016 04:47	51.76745	-5.248706	bird 30	35.18791	299	89.93003024	0.300769332	4072.251108	167.6	4:00:00
22/07/2016	04:52:23	22/07/2016 04:52	51.76811	-5.247954	bird 30	40.42033	298	101.0132369	0.338970594	4162.041975	167.6	4:00:00
22/07/2016	04:57:21	22/07/2016 04:57	51.7688	-5.247003	bird 30	30.45353	300	112.0996396	0.373665465	4262.346456	170.7	4:00:00
22/07/2016	05:02:21	22/07/2016 05:02	51.76967	-5.246184	bird 30	37.89926	298	135.9762882	0.456296269	4373.98386	170.7	5:00:00
22/07/2016	05:07:19	22/07/2016 05:07	51.77063	-5.244965	bird 30	29.82359	299	139.7847849	0.467507642	4509.475241	171.9	5:00:00
26/07/2016	22:20:11	26/07/2016 22:20	51.74054	-5.276925	bird 30	222.2143	336	523.1057394	1.55686232	514.0170498	235.9	22:00:00
22/07/2016	02:38:05	22/07/2016 02:38	51.74771	-5.271516	bird 31	49.18486	309	241.2028442	0.780591729	1375.130272	154.9	2:00:00
22/07/2016	02:43:14	22/07/2016 02:43	51.74913	-5.268877	bird 31	66.70092	349	281.9293349	0.807820444	1607.088168	154.9	2:00:00
22/07/2016	02:49:03	22/07/2016 02:49	51.75013	-5.265126	bird 31	53.40761	361	62.42270307	0.172916075	1851.529314	158.8	2:00:00
22/07/2016	02:55:04	22/07/2016 02:55	51.75046	-5.264395	bird 31	59.74746	346	298.0627002	0.861452891	1911.868644	158.7	2:00:00
22/07/2016	03:00:50	22/07/2016 03:00	51.75181	-5.260667	bird 31	29.27596	315	353.7629342	1.123056934	2193.792426	158.7	3:00:00
23/07/2016	17:58:26	23/07/2016 17:58	51.75762	-5.296672	bird 31	51.93639	307	248.4248963	0.809201617	2475.658658	187.3	17:00:00
23/07/2016	18:03:33	23/07/2016 18:03	51.75899	-5.293831	bird 31	49.75765	303	256.4073482	0.846228872	2547.516272	187.3	18:00:00
23/07/2016	18:08:36	23/07/2016 18:08	51.76048	-5.290998	bird 31	49.6637	304	261.8789122	0.86144379	2653.89533	195.6	18:00:00
23/07/2016	18:13:40	23/07/2016 18:13	51.762	-5.288102	bird 31	46.64965	321	277.8039627	0.865432906	2782.491261	195.6	18:00:00
23/07/2016	18:19:01	23/07/2016 18:19	51.76371	-5.28517	bird 31	49.54013	306	257.4804891	0.841439507	2949.719089	198.4	18:00:00
23/07/2016	18:24:07	23/07/2016 18:24	51.76521	-5.28233	bird 31	48.10808	305	252.0681201	0.826452853	3109.271583	198.4	18:00:00
23/07/2016	18:29:12	23/07/2016 18:29	51.76672	-5.279608	bird 31	45.03378	305	231.5851468	0.759295563	3281.880312	192	18:00:00
23/07/2016	18:34:17	23/07/2016 18:34	51.76819	-5.277233	bird 31	43.43728	305	228.7371904	0.749958001	3457.323865	192	18:00:00
23/07/2016	18:39:22	23/07/2016 18:39	51.76968	-5.27495	bird 31	38.79447	305	232.6481188	0.762780717	3640.333265	197.9	18:00:00
23/07/2016	18:44:27	23/07/2016 18:44	51.77131	-5.272839	bird 31	39.55741	305	239.9890567	0.786849366	3841.560195	197.9	18:00:00
23/07/2016	18:49:32	23/07/2016 18:49	51.77297	-5.270619	bird 31	37.6903	305	239.3115418	0.784628006	4050.85406	212.9	18:00:00
23/07/2016	18:54:37	23/07/2016 18:54	51.77467	-5.268495	bird 31	35.11036	306	229.9213337	0.751376908	4266.215394	212.9	18:00:00
23/07/2016	18:59:43	23/07/2016 18:59	51.77636	-5.266578	bird 31	34.28616	309	231.6404824	0.749645574	4479.454552	229.3	18:00:00
23/07/2016	19:04:52	23/07/2016 19:04	51.77808	-5.264687	bird 31	32.12287	307	221.0976852	0.7201879	4697.002142	229.3	19:00:00
23/07/2016	19:09:59	23/07/2016 19:09	51.77976	-5.262976	bird 31	30.95959	307	206.2011682	0.671665043	4908.177991	236.6	19:00:00
23/07/2016	20:51:49	23/07/2016 20:51	51.77343	-5.246084	bird 31	137.8495	303	80.17674243	0.264609711	4728.082963	234.5	20:00:00
23/07/2016	20:56:52	23/07/2016 20:56	51.7729	-5.245297	bird 31	148.4114	323	83.68943314	0.259100412	4707.02816	225.9	20:00:00
23/07/2016	21:02:15	23/07/2016 21:02	51.77226	-5.24466	bird 31	156.0806	314	70.46550272	0.224412429	4671.348149	225.9	21:00:00
23/07/2016	21:07:29	23/07/2016 21:07	51.77168	-5.24425	bird 31	160.3787	317	111.1474414	0.350622844	4633.582269	234.5	21:00:00
23/07/2016	21:12:46	23/07/2016 21:12	51.77074	-5.243705	bird 31	178.4916	318	84.58871569	0.266002251	4569.245296	234.5	21:00:00
23/07/2016	21:18:04	23/07/2016 21:18	51.76998	-5.243673	bird 31	180.2817	323	111.2643396	0.34447164	4501.942521	220.3	21:00:00
23/07/2016	21:23:27	23/07/2016 21:23	51.76898	-5.243681	bird 31	182.6973	328	119.1825955	0.363361572	4412.21792	220.3	21:00:00
23/07/2016	21:28:55	23/07/2016 21:28	51.76791	-5.243762	bird 31	203.9206	382	154.8077264	0.405255828	4314.262102	224.7	21:00:00
23/07/2016	21:35:17	23/07/2016 21:35	51.76664	-5.244678	bird 31	211.48	421	197.0314439	0.46800818	4164.208844	217.5	21:00:00
23/07/2016	21:42:18	23/07/2016 21:42	51.76513	-5.246169	bird 31	218.1386	465	1056.186192	2.271368155	3968.922541	217.5	21:00:00
23/07/2016	21:50:03	23/07/2016 21:50	51.75767	-5.255629	bird 31	237.1719	492	258.7700444	0.525955375	2914.477742	211.6	21:00:00
23/07/2016	21:58:15	23/07/2016 21:58	51.75641	-5.258779	bird 31	240.0989	309	184.7164141	0.597787748	2670.627153	194.3	21:00:00
23/07/2016	22:03:24	23/07/2016 22:03	51.75559	-5.261105	bird 31	240.8076	306	179.1688801	0.585519216	2502.407437	194.3	22:00:00
23/07/2016	22:08:30	23/07/2016 22:08	51.7548	-5.263366	bird 31	246.2503	305	182.721102	0.59908558	2341.859559	206.6	22:00:00
11/08/2016	02:17:17	11/08/2016 02:17	51.72783	-5.282856	bird 32	214.4076	294	330.2797391	1.123400473	1048.294793	289.2	2:00:00
11/08/2016	02:22:11	11/08/2016 02:22	51.72538	-5.285555	bird 32	227.2918	293	389.5709009	1.329593519	1340.130652	289.2	2:00:00
11/08/2016	02:31:57	11/08/2016 02:31	51.71599	-5.300552	bird 32	236.8111	294	274.881738	0.934971898	2681.626517	301.3	2:00:00
11/08/2016	02:36:51	11/08/2016 02:36	51.71464	-5.303883	bird 32	235.0281	293	266.3918656	0.909187255	2925.2529	290.7	2:00:00
11/08/2016	02:41:44	11/08/2016 02:41	51.71327	-5.307044	bird 32	226.3059	294	248.4487664	0.845063831	3169.394362	290.7	2:00:00
11/08/2016	02:46:38	11/08/2016 02:46	51.71173	-5.309647	bird 32	222.418	293	239.9789145	0.819040664	3410.898559	299	2:00:00
11/08/2016	02:51:31	11/08/2016 02:51	51.71014	-5.311993	bird 32	212.7687	294	249.1014592	0.847283875	3647.851312	299	2:00:00
11/08/2016	02:56:25	11/08/2016 02:56	51.70826	-5.31395	bird 32	207.6851	307	262.6646343	0.855585128	3896.539861	296.7	2:00:00
11/08/2016	03:01:32	11/08/2016 03:01	51.70617	-5.315717	bird 32	205.6797	337	302.4944736	0.897609714	4157.3092	296.7	3:00:00
11/08/2016	03:07:09	11/08/2016 03:07	51.70372	-5.317614	bird 32	206.8435	335	297.1426121	0.886992872	4456.64554	298.8	3:00:00
11/08/2016	03:12:44	11/08/2016 03:12	51.70134	-5.319564	bird 32	202.3187	348	323.6327587	0.929979192	4751.777032	298.8	3:00:00
11/08/2016	21:51:47	11/08/2016 21:51	51.74224	-5.268414	bird 32	111.4964	463	54.51106468	0.117734481	1097.583723	245.9	21:00:00
11/08/2016	21:59:30	11/08/2016 21:59	51.74206	-5.26768	bird 32	269.1464	483	119.7070258	0.247840633	1131.873299	250.1	21:00:00
11/08/2016	22:07:33	11/08/2016 22:07	51.74205	-5.269413	bird 32	43.68031	460	21.71298391	0.047202139	1027.69272	259.9	22:00:00
11/08/2016	22:15:13	11/08/2016 22:15	51.74219	-5.269194	bird 32	270.9669	308	72.74114886	0.236172561	1048.678488	262.9	22:00:00
15/08/2016	02:35:59	15/08/2016 02:35	51.74182	-5.279403	bird 33	10.80101	292	693.3001053	2.374315429	542.8180877	119	2:00:00
15/08/2016	02:40:51	15/08/2016 02:40	51.74794	-5.277515	bird 33	22.06272	290	204.0644632	0.703670563	1231.27478	119	2:00:00
15/08/2016	02:45:41	15/08/2016 02:45	51.74964	-5.276406	bird 33	45.88008	288	108.99061	0.378439618	1433.867371	120.4	2:00:00
15/08/2016	02:50:29	15/08/2016 02:50	51.75032	-5.27527	bird 33	0.04731232	289	667.5761976	2.309952241	1529.122615	120.4	2:00:00
15/08/2016	02:55:18	15/08/2016 02:55	51.75632	-5.275262	bird 33	68.58974	294	169.8744692	0.577804317	2173.330258	120.2	2:00:00
15/08/2016	03:00:12	15/08/2016 03:00	51.75687	-5.272967	bird 33	40.98366	308	229.9294842	0.746524299	2271.924788	120.2	3:00:00
15/08/2016	03:05:20	15/08/2016 03:05	51.75843	-5.270783	bird 33	43.03683	306	275.7905237	0.901276221	2482.278222	119.4	3:00:00
15/08/2016	03:10:26	15/08/2016 03:10	51.76024	-5.268054	bird 33	43.08296	308	241.2029351	0.783126413	2734.958131	119.4	3:00:00
15/08/2016	03:15:34	15/08/2016 03:15	51.76182	-5.265662	bird 33	32.89016	309	189.4652404	0.613156118	2959.08863	119.3	3:00:00
15/08/2016	03:20:43	15/08/2016 03:20	51.76325	-5.264172	bird 33	14.99082	308	740.8044197	2.405209155	3145.464785	119.3	3:00:00
15/08/2016	03:25:51	15/08/2016 03:25	51.76968	-5.261387	bird 33	28.63477	310	147.021438	0.474262703	3879.566865	120.1	3:00:00
15/08/2016	03:31:01	15/08/2016 03:31	51.77084	-5.260367	bird 33	31.06408	311	137.6404486	0.44257379	4025.383896	120.1	3:00:00
15/08/2016	03:36:12	15/08/2016 03:36	51.7719	-5.259339	bird 33	10.17051	311	145.8324529	0.46891464	4161.182157	119.6	3:00:00
15/08/2016	03:41:23	15/08/2016 03:41	51.77319	-5.258965	bird 33	22.10171	311	142.9565602	0.459667396	4303.824001	119.6	3:00:00
16/08/2016	00:16:17	16/08/2016 00:16	51.77171	-5.312845	bird 33	156.8374	309	109.0348925	0.35286373	4375.381426	147.6	0:00:00
16/08/2016	00:21:26	16/08/2016 00:21	51.77081	-5.31222	bird 33	140.4637	310	96.81936575	0.312320535	4266.99326	147.6	0:00:00
16/08/2016	00:26:36	16/08/2016 00:26	51.77014	-5.311325	bird 33	146.214	311	79.08839703	0.254303527	4172.010705	147.9	0:00:00
16/08/2016	00:31:47	16/08/2016 00:31	51.76955	-5.310686	bird 33	140.3337	311	95.08345422	0.305734579	4093.347827	147.9	0:00:00
16/08/2016	00:36:58	16/08/2016 00:36	51.76889	-5.309811	bird 33	96.1621	310	91.34875741	0.294673411	4000.109008	142.9	0:00:00
16/08/2016	00:42:08	16/08/2016 00:42	51.76881	-5.308494	bird 33	62.58471	311	85.70611732	0.275582371	3949.878636	142.9	0:00:00
16/08/2016	00:47:19	16/08/2016 00:47	51.76916	-5.307388	bird 33	74.73841	311	98.63947931	0.317168744	3950.448733	138.5	0:00:00
16/08/2016	00:52:30	16/08/2016 00:52	51.76939	-5.306008	bird 33	16.78561	310	670.6487518	2.16338307	3932.856397	138.5	0:00:00
16/08/2016	00:57:40	16/08/2016 00:57	51.77516	-5.303198	bird 33	89.37727	315	41.06782475	0.130374047	4457.288595	136.7	0:00:00
16/08/2016	01:02:55	16/08/2016 01:02	51.77516	-5.302603	bird 33	57.75454	310	72.67410661	0.234432602	4444.155832	136.7	1:00:00
16/08/2016	01:08:05	16/08/2016 01:08	51.77551	-5.301714	bird 33	61.09233	310	75.75291503	0.244364242	4462.25719	138.7	1:00:00
16/08/2016	01:13:15	16/08/2016 01:13	51.77584	-5.300754	bird 33	85.26891	310	45.95100103	0.148229036	4477.930072	138.7	1:00:00
16/08/2016	01:18:25	16/08/2016 01:18	51.77587	-5.30009	bird 33	54.40234	310	86.67057322	0.279582494	4468.29231	138.4	1:00:00
16/08/2016	01:23:35	16/08/2016 01:23	51.77632	-5.299065	bird 33	37.03409	310	151.5602159	0.488903922	4497.644081	138.4	1:00:00
16/08/2016	01:28:45	16/08/2016 01:28	51.77741	-5.297748	bird 33	34.04468	310	172.100975	0.555164436	4592.815724	137.6	1:00:00
16/08/2016	01:33:55	16/08/2016 01:33	51.77869	-5.296348	bird 33	26.71725	310	170.8154467	0.55101757	4710.415175	137.6	1:00:00
16/08/2016	01:39:05	16/08/2016 01:39	51.78006	-5.295231	bird 33	31.42784	310	169.7721319	0.547652039	4844.687254	137.5	1:00:00
16/08/2016	01:44:15	16/08/2016 01:44	51.78136	-5.293943	bird 33	26.95362	310	164.8533077	0.531784863	4971.5776	137.5	1:00:00
16/08/2016	14:09:29	16/08/2016 14:09	51.74891	-5.281469	bird 33	180.8578	1390	1251.843774	0.900607032	1297.659772	120.3	14:00:00
31/05/2016	23:38:48	31/05/2016 23:38	51.74388	-5.269707	bird 34	351.4033	923	1893.927185	2.051925444	1131.239325	18.1	23:00:00
11/06/2016	23:16:55	11/06/2016 23:16	51.7747	-5.289979	bird 34	170.2573	899	1389.786857	1.545925314	4199.075018	143.9	23:00:00
11/06/2016	23:31:54	11/06/2016 23:31	51.76239	-5.286564	bird 34	170.7357	899	2093.571122	2.328777666	2812.031634	142.3	23:00:00
11/06/2016	23:46:53	11/06/2016 23:46	51.74382	-5.281673	bird 34	181.6788	906	750.2323436	0.828071019	731.577523	137	23:00:00
12/06/2016	23:02:23	12/06/2016 23:02	51.73301	-5.261724	bird 34	287.9287	938	1471.167991	1.568409373	1484.43177	276.1	23:00:00
13/06/2016	02:08:43	13/06/2016 02:08	51.74306	-5.275622	bird 34	343.1325	918	458.193151	0.49912108	787.8291734	289.7	2:00:00
13/06/2016	02:24:01	13/06/2016 02:24	51.747	-5.277552	bird 34	315.4822	914	1614.44349	1.766349551	1129.956434	286	2:00:00
13/06/2016	02:39:15	13/06/2016 02:39	51.75733	-5.29397	bird 34	262.5145	917	711.9753941	0.776418096	2376.318718	286.8	2:00:00
13/06/2016	20:29:11	13/06/2016 20:29	51.75777	-5.335417	bird 34	159.2933	1338	766.2987752	0.572719563	4318.245799	270.9	20:00:00
13/06/2016	20:51:29	13/06/2016 20:51	51.75133	-5.331483	bird 34	59.07423	1444	2232.359327	1.545955213	3739.126272	271.9	20:00:00
13/06/2016	21:15:33	13/06/2016 21:15	51.76162	-5.303729	bird 34	154.1008	1476	436.607166	0.295804313	3089.991659	272.1	21:00:00
13/06/2016	21:40:09	13/06/2016 21:40	51.75809	-5.300967	bird 34	139.0421	916	169.9986291	0.185588023	2654.505679	268.2	21:00:00
13/06/2016	21:55:25	13/06/2016 21:55	51.75694	-5.299346	bird 34	119.7526	917	872.0008436	0.950927856	2488.702804	271.1	21:00:00
13/06/2016	22:10:42	13/06/2016 22:10	51.75306	-5.288374	bird 34	117.2225	914	135.9028894	0.148690251	1809.445181	269.6	22:00:00
13/06/2016	22:25:56	13/06/2016 22:25	51.7525	-5.286625	bird 34	123.2308	913	270.7926962	0.2965966	1723.531713	272.9	22:00:00
13/06/2016	22:41:09	13/06/2016 22:41	51.75117	-5.283341	bird 34	142.1035	914	455.6894507	0.498566139	1550.188579	271.5	22:00:00
13/06/2016	22:56:23	13/06/2016 22:56	51.74794	-5.279284	bird 34	188.6846	933	1228.010991	1.316196132	1205.353061	266	22:00:00
14/06/2016	01:19:30	14/06/2016 01:19	51.72693	-5.283225	bird 34	219.8007	899	2079.553532	2.313185241	1149.609115	272.5	1:00:00
14/06/2016	02:20:21	14/06/2016 02:20	51.70811	-5.336422	bird 34	336.6331	915	823.3116121	0.899794112	4946.189249	277.5	2:00:00
14/06/2016	02:35:36	14/06/2016 02:35	51.7149	-5.341157	bird 34	336.3112	915	844.805948	0.923285189	4762.787564	274.4	2:00:00
14/06/2016	02:50:51	14/06/2016 02:50	51.72185	-5.34608	bird 34	336.0223	916	807.7556296	0.88182929	4723.138142	275.1	2:00:00
14/06/2016	03:06:07	14/06/2016 03:06	51.72848	-5.350843	bird 34	335.3677	911	735.8614187	0.807751283	4829.00606	276.2	3:00:00
14/06/2016	23:00:16	14/06/2016 23:00	51.71391	-5.240234	bird 34	320.6293	935	1209.208433	1.293271051	3882.72222	298.5	23:00:00
14/06/2016	23:15:51	14/06/2016 23:15	51.7223	-5.251356	bird 34	296.3421	933	886.9016476	0.950591262	2695.365821	302.8	23:00:00
14/06/2016	23:31:24	14/06/2016 23:31	51.72583	-5.262864	bird 34	313.5634	932	1818.656231	1.951347887	1838.154961	309	23:00:00
15/06/2016	00:02:36	15/06/2016 00:02	51.74308	-5.276311	bird 34	30.74548	923	221.3549814	0.239821215	763.5809832	318.1	0:00:00
15/06/2016	00:17:59	15/06/2016 00:17	51.74479	-5.274673	bird 34	42.37819	929	140.3081695	0.151031399	984.6154776	321.2	0:00:00
15/06/2016	00:33:28	15/06/2016 00:33	51.74572	-5.273301	bird 34	89.57517	928	60.22595042	0.064898653	1122.496161	327.7	0:00:00
15/06/2016	00:48:56	15/06/2016 00:48	51.74572	-5.272429	bird 34	68.4899	953	139.3744704	0.146248133	1156.240517	341.7	0:00:00
15/06/2016	01:04:49	15/06/2016 01:04	51.74618	-5.270552	bird 34	41.41731	938	835.0058147	0.890198097	1275.089424	340.9	1:00:00
15/06/2016	01:20:27	15/06/2016 01:20	51.7518	-5.262539	bird 34	14.76959	1079	684.7297613	0.634596628	2108.128434	334.5	1:00:00
17/06/2016	22:49:58	17/06/2016 22:49	51.77096	-5.273268	bird 34	200.6143	921	297.2648923	0.322763184	3798.322177	300.1	22:00:00
17/06/2016	23:05:19	17/06/2016 23:05	51.76846	-5.274787	bird 34	189.5626	915	776.3445447	0.848463983	3507.60091	300.3	23:00:00
17/06/2016	23:20:34	17/06/2016 23:20	51.76158	-5.276661	bird 34	207.5354	930	395.4911445	0.425259295	2732.01954	308.3	23:00:00
19/08/2016	01:02:33	19/08/2016 01:02	51.73994	-5.279828	bird 35	210.0595	2465	296.0857268	0.120115914	339.879063	153.2	1:00:00
19/08/2016	17:45:48	19/08/2016 17:45	51.74758	-5.282465	bird 35	177.649	518	1129.155709	2.179837276	1149.069542	201.3	17:00:00
19/08/2016	20:04:09	19/08/2016 20:04	51.73954	-5.27905	bird 35	220.8389	2005	285.4913524	0.142389702	333.1384979	203.1	20:00:00
20/08/2016	00:21:49	20/08/2016 00:21	51.7418	-5.281878	bird 35	181.5191	3718	385.1036531	0.103578175	506.5644146	221.7	0:00:00
21/08/2016	12:46:35	21/08/2016 12:46	51.7451	-5.283264	bird 35	172.9003	363	876.8215237	2.415486291	876.3914214	221.7	12:00:00
17/07/2016	02:57:32	17/07/2016 02:57	51.74406	-5.272673	bird 36	9.704834	310	343.1775493	1.107024352	1000.478815	242.4	2:00:00
17/07/2016	03:02:42	17/07/2016 03:02	51.7471	-5.271833	bird 36	358.884	309	308.2558799	0.997591844	1306.232866	242.4	3:00:00
17/07/2016	03:07:51	17/07/2016 03:07	51.74987	-5.27192	bird 36	55.08291	308	97.36113972	0.316107597	1570.812979	235.1	3:00:00
17/07/2016	03:12:59	17/07/2016 03:12	51.75037	-5.270763	bird 36	354.2371	309	451.7919075	1.462109733	1656.903856	235.1	3:00:00
17/07/2016	03:18:08	17/07/2016 03:18	51.75441	-5.271421	bird 36	335.9818	308	426.6407234	1.385197154	2046.695127	236.3	3:00:00
17/07/2016	03:23:16	17/07/2016 03:23	51.75791	-5.273945	bird 36	55.03801	307	165.3295098	0.538532605	2366.200512	236.3	3:00:00
17/07/2016	03:33:30	17/07/2016 03:33	51.76612	-5.278933	bird 36	33.47114	308	177.5801506	0.57655893	3218.140048	245.8	3:00:00
17/07/2016	03:38:38	17/07/2016 03:38	51.76745	-5.277511	bird 36	37.1184	309	171.738452	0.555787871	3373.576136	243.5	3:00:00
17/07/2016	03:43:47	17/07/2016 03:43	51.76868	-5.276008	bird 36	33.67873	310	177.8447018	0.573692586	3520.703505	243.5	3:00:00
17/07/2016	03:48:57	17/07/2016 03:48	51.77001	-5.274579	bird 36	31.21153	310	174.5513178	0.563068767	3680.224391	248.2	3:00:00
17/07/2016	03:54:07	17/07/2016 03:54	51.77135	-5.273264	bird 36	29.60131	311	162.6180465	0.522887609	3841.170613	248.2	3:00:00
17/07/2016	03:59:18	17/07/2016 03:59	51.77262	-5.272098	bird 36	28.02514	310	181.5498035	0.585644528	3993.783384	248.8	3:00:00
17/07/2016	04:04:28	17/07/2016 04:04	51.77406	-5.270861	bird 36	359.7613	306	231.4292157	0.756304626	4166.624098	248.8	4:00:00
17/07/2016	04:09:34	17/07/2016 04:09	51.77614	-5.270875	bird 36	40.71908	306	145.6195362	0.475880837	4393.879414	239.7	4:00:00
17/07/2016	04:14:40	17/07/2016 04:14	51.77713	-5.269495	bird 36	41.8842	307	137.5843192	0.448157391	4519.630708	239.7	4:00:00
17/07/2016	04:19:47	17/07/2016 04:19	51.77805	-5.268163	bird 36	49.75306	307	123.9790377	0.403840514	4638.227417	244.6	4:00:00
17/07/2016	04:24:54	17/07/2016 04:24	51.77877	-5.266792	bird 36	45.36307	307	122.4173405	0.398753552	4736.750502	244.6	4:00:00
17/07/2016	04:30:01	17/07/2016 04:30	51.77954	-5.265525	bird 36	38.88196	307	118.4153644	0.385717799	4840.133273	236.8	4:00:00
17/07/2016	04:35:08	17/07/2016 04:35	51.78037	-5.264451	bird 36	33.65779	308	127.3786735	0.413567122	4947.545422	239.2	4:00:00
17/07/2016	21:53:49	17/07/2016 21:53	51.75246	-5.290356	bird 36	232.9116	306	217.8285411	0.711857977	1783.03518	177.7	21:00:00
17/07/2016	21:58:55	17/07/2016 21:58	51.75128	-5.292873	bird 36	281.416	332	124.5237221	0.375071452	1725.695609	184.8	21:00:00
17/07/2016	22:04:27	17/07/2016 22:04	51.7515	-5.294641	bird 36	236.5916	325	235.2449468	0.723830605	1802.567206	184.8	22:00:00
17/07/2016	22:15:13	17/07/2016 22:15	51.73927	-5.270775	bird 36	250.6646	354	62.7947685	0.177386352	815.915771	186.9	22:00:00
17/07/2016	22:21:07	17/07/2016 22:21	51.73908	-5.271631	bird 36	145.1285	395	293.303228	0.742539818	753.4459087	186.9	22:00:00
17/07/2016	22:27:42	17/07/2016 22:27	51.73692	-5.269197	bird 36	62.66673	301	232.0212337	0.770834663	893.7455865	185.3	22:00:00
17/07/2016	22:32:43	17/07/2016 22:32	51.73787	-5.266207	bird 36	146.6809	322	122.8751235	0.381599762	1101.056636	185.3	22:00:00
17/07/2016	22:38:05	17/07/2016 22:38	51.73695	-5.265223	bird 36	272.3405	361	500.4687674	1.386340076	1167.120232	177.4	22:00:00
17/07/2016	22:44:06	17/07/2016 22:44	51.73713	-5.272462	bird 36	290.5094	415	545.1788442	1.313683962	668.301546	177.4	22:00:00
17/07/2016	22:51:01	17/07/2016 22:51	51.73884	-5.279858	bird 36	40.75428	304	514.2772355	1.691701433	237.8815394	177.5	22:00:00
17/07/2016	22:56:05	17/07/2016 22:56	51.74234	-5.274995	bird 36	200.9204	314	60.72288408	0.193384981	751.2463178	177.9	22:00:00
17/07/2016	23:01:19	17/07/2016 23:01	51.74183	-5.275308	bird 36	150.0305	314	286.400336	0.912102981	694.6598977	177.9	23:00:00
17/07/2016	23:06:33	17/07/2016 23:06	51.7396	-5.273237	bird 36	153.593	313	79.56877085	0.254213325	668.1127491	182.7	23:00:00
17/07/2016	23:11:46	17/07/2016 23:11	51.73896	-5.272723	bird 36	123.4087	309	307.9738162	0.996679017	677.4879893	182.7	23:00:00
17/07/2016	23:16:55	17/07/2016 23:16	51.73744	-5.268997	bird 36	166.1128	317	59.64737957	0.188162081	907.0203252	178.9	23:00:00
17/07/2016	23:22:12	17/07/2016 23:22	51.73692	-5.268787	bird 36	176.928	316	307.527543	0.973188427	921.9553256	178.9	23:00:00
17/07/2016	23:27:28	17/07/2016 23:27	51.73416	-5.268548	bird 36	57.28049	309	575.6817122	1.863047612	998.6040248	184.6	23:00:00
17/07/2016	23:32:37	17/07/2016 23:32	51.73695	-5.26153	bird 36	283.335	312	389.2140876	1.24748105	1421.335267	184.6	23:00:00
17/07/2016	23:37:49	17/07/2016 23:37	51.73775	-5.267015	bird 36	203.3767	315	84.92115755	0.269590976	1044.7376	187.9	23:00:00
17/07/2016	23:43:04	17/07/2016 23:43	51.73705	-5.267505	bird 36	143.8694	313	54.11178227	0.172881094	1009.750819	187.9	23:00:00
17/07/2016	23:48:17	17/07/2016 23:48	51.73666	-5.267037	bird 36	246.685	315	64.55942746	0.204950563	1043.790625	193.4	23:00:00
17/07/2016	23:53:32	17/07/2016 23:53	51.73643	-5.267895	bird 36	210.8426	311	452.4299002	1.454758521	986.8615668	193.4	23:00:00
17/07/2016	23:58:43	17/07/2016 23:58	51.73294	-5.271256	bird 36	271.5678	314	28.55417664	0.090936868	890.9716402	193.1	23:00:00
18/07/2016	00:03:57	18/07/2016 00:03	51.73295	-5.271669	bird 36	311.7048	311	58.71161416	0.188783325	866.5122048	193.1	0:00:00
18/07/2016	00:09:08	18/07/2016 00:09	51.7333	-5.272305	bird 36	251.4226	314	329.6456657	1.049826961	808.5549626	199.6	0:00:00
18/07/2016	00:14:22	18/07/2016 00:14	51.73236	-5.27683	bird 36	237.596	310	12.03817637	0.038832827	656.0393485	199.6	0:00:00
18/07/2016	00:19:32	18/07/2016 00:19	51.7323	-5.276975	bird 36	209.0126	312	84.0211985	0.269298713	656.0844454	195.9	0:00:00
18/07/2016	00:24:44	18/07/2016 00:24	51.73164	-5.277566	bird 36	236.9368	310	185.6307596	0.598808902	699.3927039	195.9	0:00:00
18/07/2016	00:29:54	18/07/2016 00:29	51.73073	-5.279818	bird 36	256.7142	309	122.2477648	0.395623834	742.5594108	202.5	0:00:00
18/07/2016	00:35:03	18/07/2016 00:35	51.73048	-5.281541	bird 36	264.1646	313	150.3195677	0.48025421	753.7763357	204.3	0:00:00
18/07/2016	00:40:16	18/07/2016 00:40	51.73034	-5.283705	bird 36	253.3067	310	146.8179857	0.473606406	775.3988959	204.3	0:00:00
18/07/2016	00:50:32	18/07/2016 00:50	51.73224	-5.310393	bird 36	321.548	308	585.9473869	1.902426581	2022.032918	204.4	0:00:00
18/07/2016	00:55:40	18/07/2016 00:55	51.73636	-5.315676	bird 36	176.6541	309	32.31994208	0.104595282	2309.657423	188	0:00:00
18/07/2016	01:00:49	18/07/2016 01:00	51.73607	-5.315649	bird 36	180.5459	311	28.92952566	0.093020983	2309.411451	188	1:00:00
18/07/2016	01:06:00	18/07/2016 01:06	51.73581	-5.315653	bird 36	190.2249	313	35.04720824	0.111971911	2311.512651	184.2	1:00:00
18/07/2016	01:21:38	18/07/2016 01:21	51.74223	-5.276073	bird 36	221.6657	311	27.87282551	0.089623233	694.898977	187.9	1:00:00
18/07/2016	01:26:49	18/07/2016 01:26	51.74204	-5.276336	bird 36	4.93805	314	68.11764317	0.216935169	667.1264901	180.5	1:00:00
18/07/2016	01:32:03	18/07/2016 01:32	51.74265	-5.276252	bird 36	252.0599	316	60.89381381	0.192701942	725.6859813	180.5	1:00:00
18/07/2016	01:37:19	18/07/2016 01:37	51.74248	-5.27709	bird 36	320.277	316	362.2111563	1.146237836	678.6819635	179.8	1:00:00
18/07/2016	01:42:35	18/07/2016 01:42	51.74498	-5.280449	bird 36	207.7439	311	26.30629483	0.084586157	867.8618637	179.8	1:00:00
18/07/2016	01:47:46	18/07/2016 01:47	51.74477	-5.280624	bird 36	280.7588	315	52.62424916	0.167061108	843.1331356	171.7	1:00:00
18/07/2016	01:53:01	18/07/2016 01:53	51.74486	-5.281372	bird 36	168.4038	314	447.5589958	1.42534712	848.1952395	171.7	1:00:00
18/07/2016	01:58:15	18/07/2016 01:58	51.74092	-5.280066	bird 36	49.84109	317	267.3171322	0.84327171	433.1597786	165.8	1:00:00
18/07/2016	02:03:32	18/07/2016 02:03	51.74247	-5.277109	bird 36	10.3295	312	27.17486778	0.087098935	677.0553505	165.8	2:00:00
18/07/2016	02:08:44	18/07/2016 02:08	51.74271	-5.277036	bird 36	21.47669	314	69.3071356	0.220723362	702.5906674	174	2:00:00
18/07/2016	02:13:58	18/07/2016 02:13	51.74329	-5.27667	bird 36	133.0952	313	125.9167726	0.402290008	771.0832094	174	2:00:00
18/07/2016	02:19:11	18/07/2016 02:19	51.74252	-5.275334	bird 36	53.45318	323	91.95000272	0.284674931	751.6199619	177.9	2:00:00
18/07/2016	02:24:34	18/07/2016 02:24	51.74301	-5.274262	bird 36	89.81336	314	103.0533193	0.328195284	840.6365588	177.9	2:00:00
18/07/2016	02:29:48	18/07/2016 02:29	51.74301	-5.27277	bird 36	48.09987	314	118.4579487	0.377254614	910.5136252	176.5	2:00:00
18/07/2016	02:35:02	18/07/2016 02:35	51.74372	-5.271492	bird 36	13.98789	320	186.9487219	0.584214756	1028.603592	176.7	2:00:00
18/07/2016	02:40:22	18/07/2016 02:40	51.74535	-5.270835	bird 36	25.25214	316	148.8102953	0.470918656	1191.750659	176.7	2:00:00
18/07/2016	02:45:38	18/07/2016 02:45	51.74656	-5.269917	bird 36	23.57028	315	163.964364	0.520521791	1335.4397	171.2	2:00:00
18/07/2016	02:50:53	18/07/2016 02:50	51.74791	-5.268965	bird 36	24.65567	315	135.8664262	0.431321988	1493.866025	171.2	2:00:00
18/07/2016	02:56:08	18/07/2016 02:56	51.74902	-5.268145	bird 36	22.40959	316	137.3226928	0.434565483	1626.445093	163	2:00:00
18/07/2016	03:01:24	18/07/2016 03:01	51.75016	-5.267383	bird 36	29.59843	303	130.5710161	0.430927446	1759.906827	163	3:00:00
18/07/2016	03:06:27	18/07/2016 03:06	51.75118	-5.266448	bird 36	11.73425	305	154.587287	0.506843564	1889.702533	155.5	3:00:00
18/07/2016	03:11:32	18/07/2016 03:11	51.75254	-5.26599	bird 36	28.61473	304	154.5148858	0.508272651	2032.633342	155.5	3:00:00
18/07/2016	03:16:36	18/07/2016 03:16	51.75376	-5.264921	bird 36	25.18433	303	146.4688698	0.48339561	2186.470383	156.9	3:00:00
18/07/2016	03:21:39	18/07/2016 03:21	51.75495	-5.264014	bird 36	27.83825	303	138.5681654	0.457320678	2331.564945	156.9	3:00:00
18/07/2016	03:26:42	18/07/2016 03:26	51.75605	-5.263073	bird 36	29.75408	303	117.8232587	0.388855639	2469.565013	148.5	3:00:00
18/07/2016	03:31:45	18/07/2016 03:31	51.75697	-5.262228	bird 36	26.41617	305	98.19570454	0.32195313	2587.13136	148.5	3:00:00
18/07/2016	03:36:50	18/07/2016 03:36	51.75776	-5.261594	bird 36	36.1757	305	112.9352773	0.370279598	2684.760526	146.5	3:00:00
18/07/2016	03:41:55	18/07/2016 03:41	51.75858	-5.26063	bird 36	38.3415	303	133.6442243	0.441070047	2797.235782	146.5	3:00:00
18/07/2016	03:46:58	18/07/2016 03:46	51.75952	-5.259425	bird 36	51.43478	303	107.914116	0.356152198	2929.86763	158.4	3:00:00
18/07/2016	03:52:01	18/07/2016 03:52	51.76012	-5.258197	bird 36	48.40556	303	110.4019102	0.36436274	3031.638836	158.4	3:00:00
18/07/2016	03:57:04	18/07/2016 03:57	51.76078	-5.257003	bird 36	53.76531	309	118.7869552	0.384423803	3138.070136	163.2	3:00:00
18/07/2016	04:02:13	18/07/2016 04:02	51.76141	-5.255614	bird 36	47.8417	302	96.28479104	0.318823811	3249.518427	163.2	4:00:00
18/07/2016	04:07:15	18/07/2016 04:07	51.76199	-5.254579	bird 36	52.50949	303	103.0030299	0.339943993	3342.989031	162.8	4:00:00
18/07/2016	04:12:18	18/07/2016 04:12	51.76255	-5.253391	bird 36	65.49996	303	103.7503666	0.342410451	3440.834912	162.8	4:00:00
18/07/2016	04:17:21	18/07/2016 04:17	51.76294	-5.252026	bird 36	62.3499	302	125.4938694	0.415542614	3530.765195	167.2	4:00:00
18/07/2016	04:22:23	18/07/2016 04:22	51.76346	-5.250413	bird 36	64.01413	301	110.9401717	0.368571999	3643.220993	167.2	4:00:00
18/07/2016	04:27:24	18/07/2016 04:27	51.7639	-5.248971	bird 36	69.21024	303	105.3316188	0.347629105	3742.247758	160.3	4:00:00
18/07/2016	04:32:27	18/07/2016 04:32	51.76423	-5.247541	bird 36	64.89949	303	119.6159499	0.394772112	3831.81337	160.3	4:00:00
18/07/2016	04:37:30	18/07/2016 04:37	51.76469	-5.245975	bird 36	67.63446	303	108.4299935	0.357854764	3939.26235	156	4:00:00
18/07/2016	04:42:33	18/07/2016 04:42	51.76506	-5.244522	bird 36	70.71723	309	119.4037047	0.386419756	4034.710199	156	4:00:00
18/07/2016	04:47:42	18/07/2016 04:47	51.76541	-5.242887	bird 36	66.97947	304	96.94886319	0.318910734	4137.273766	154.4	4:00:00
18/07/2016	04:52:46	18/07/2016 04:52	51.76575	-5.241594	bird 36	67.32715	308	15.20650156	0.049371758	4224.267233	154.4	4:00:00
18/07/2016	04:57:54	18/07/2016 04:57	51.7658	-5.241389	bird 36	324.1767	309	606.7891843	1.963719043	4237.772986	157.9	4:00:00
18/07/2016	05:03:03	18/07/2016 05:03	51.77022	-5.246538	bird 36	62.28058	325	107.8606761	0.331879004	4410.924543	157.9	5:00:00
18/07/2016	05:08:28	18/07/2016 05:08	51.77067	-5.245154	bird 36	67.01301	325	48.05694874	0.147867535	4505.767812	154.3	5:00:00
18/07/2016	05:13:53	18/07/2016 05:13	51.77084	-5.244514	bird 36	64.44469	326	48.0030839	0.147248724	4546.337604	154.3	5:00:00
18/07/2016	05:19:19	18/07/2016 05:19	51.77102	-5.243882	bird 36	62.89358	329	51.38485382	0.156184966	4587.642979	155.7	5:00:00
18/07/2016	05:24:48	18/07/2016 05:24	51.77123	-5.243219	bird 36	142.7159	341	26.64649441	0.078142212	4633.029831	155.7	5:00:00
18/07/2016	05:30:29	18/07/2016 05:30	51.77104	-5.242984	bird 36	191.0001	339	38.57040867	0.113777017	4625.23193	154.1	5:00:00
18/07/2016	05:36:08	18/07/2016 05:36	51.7707	-5.243093	bird 36	194.0055	322	37.81393521	0.117434581	4590.176948	152.6	5:00:00
18/07/2016	05:41:30	18/07/2016 05:41	51.77037	-5.243224	bird 36	188.9587	335	29.29575153	0.087450005	4555.185626	152.6	5:00:00
18/07/2016	05:47:05	18/07/2016 05:47	51.77011	-5.243291	bird 36	192.1762	319	17.08574485	0.053560329	4529.12055	158.5	5:00:00
18/07/2016	05:52:24	18/07/2016 05:52	51.76996	-5.243344	bird 36	34.31584	316	97.41672856	0.308280787	4513.516166	158.5	5:00:00
18/07/2016	05:57:40	18/07/2016 05:57	51.77068	-5.242541	bird 36	197.0253	315	89.65907626	0.284631988	4610.749976	159.4	5:00:00
18/07/2016	06:02:55	18/07/2016 06:02	51.76991	-5.242924	bird 36	188.7721	308	43.90614157	0.142552408	4526.231255	159.4	6:00:00
18/07/2016	06:08:03	18/07/2016 06:08	51.76952	-5.243021	bird 36	358.5257	305	61.21522889	0.200705668	4487.50341	157.8	6:00:00
18/07/2016	06:13:08	18/07/2016 06:13	51.77007	-5.243044	bird 36	242.8914	306	32.58558324	0.106488834	4535.607428	157.8	6:00:00
18/07/2016	06:18:14	18/07/2016 06:18	51.76994	-5.243467	bird 36	195.1252	304	59.95926548	0.197234426	4506.714909	157.1	6:00:00
18/07/2016	06:23:18	18/07/2016 06:23	51.76942	-5.243695	bird 36	260.1775	305	37.32598518	0.122380279	4450.859724	157.1	6:00:00
18/07/2016	06:28:23	18/07/2016 06:28	51.76936	-5.244227	bird 36	219.0344	303	80.35237729	0.265189364	4423.783857	159.4	6:00:00
18/07/2016	06:33:26	18/07/2016 06:33	51.7688	-5.244962	bird 36	198.8078	302	68.14185818	0.225635292	4343.666815	159.4	6:00:00
18/07/2016	06:38:28	18/07/2016 06:38	51.76822	-5.245279	bird 36	257.4226	304	50.73123611	0.166879066	4278.768154	156.1	6:00:00
18/07/2016	06:43:32	18/07/2016 06:43	51.76812	-5.245996	bird 36	225.6651	306	65.85366593	0.215208059	4240.660669	156.1	6:00:00
18/07/2016	06:48:38	18/07/2016 06:48	51.76771	-5.246684	bird 36	257.4027	304	97.65037331	0.321218333	4175.972696	159.4	6:00:00
18/07/2016	06:53:42	18/07/2016 06:53	51.76752	-5.248065	bird 36	244.3166	303	70.98812849	0.234284252	4103.75005	159.4	6:00:00
18/07/2016	06:58:45	18/07/2016 06:58	51.76724	-5.248989	bird 36	256.4231	309	52.26210064	0.169133012	4041.979804	156.7	6:00:00
18/07/2016	07:03:54	18/07/2016 07:03	51.76713	-5.249725	bird 36	281.3588	305	669.569902	2.195311154	4003.415903	156.7	7:00:00
18/07/2016	22:06:48	18/07/2016 22:06	51.74522	-5.272444	bird 36	270.7326	311	104.7808676	0.336915973	1110.788912	75.33	22:00:00
18/07/2016	22:11:59	18/07/2016 22:11	51.74523	-5.273961	bird 36	258.9284	314	133.0220522	0.423637109	1052.095916	75.33	22:00:00
18/07/2016	22:17:13	18/07/2016 22:17	51.745	-5.275851	bird 36	260.6372	316	170.0558438	0.538151404	965.438469	84.5	22:00:00
18/07/2016	22:22:29	18/07/2016 22:22	51.74475	-5.27828	bird 36	248.5281	317	103.5746797	0.326734005	876.0501964	84.5	22:00:00
18/07/2016	22:27:46	18/07/2016 22:27	51.74441	-5.279676	bird 36	101.6905	317	163.5436867	0.515910684	814.6332401	92.1	22:00:00
18/07/2016	22:33:03	18/07/2016 22:33	51.74411	-5.277358	bird 36	120.6342	315	764.0710536	2.425622392	831.7422092	92.1	22:00:00
19/07/2016	00:01:41	19/07/2016 00:01	51.74062	-5.267831	bird 36	251.4656	849	1024.769191	1.207030849	1055.848939	128.2	0:00:00
01/06/2016	22:22:45	01/06/2016 22:22	51.75012	-5.276449	bird 37	358.7053	865	797.9584655	0.922495336	1484.444453	30.67	22:00:00
15/06/2016	15:53:00	15/06/2016 15:53	51.72327	-5.258066	bird 37	318.3242	3440	2644.325225	0.768699193	2273.860963	331.4	15:00:00
05/06/2016	00:31:23	05/06/2016 00:31	51.77819	-5.291895	bird 38	293.0179	892	88.88766269	0.099649846	4601.551095	89.7	0:00:00
05/06/2016	00:46:15	05/06/2016 00:46	51.7785	-5.293082	bird 38	147.2916	907	243.7189453	0.26870887	4648.162254	12.85	0:00:00
14/06/2016	22:43:06	14/06/2016 22:43	51.74835	-5.266877	bird 38	156.7246	919	78.79760028	0.085742764	1622.349329	297.4	22:00:00
14/06/2016	22:58:25	14/06/2016 22:58	51.7477	-5.266424	bird 38	248.5879	920	62.02971975	0.067423608	1589.163557	298.5	22:00:00
14/06/2016	23:13:45	14/06/2016 23:13	51.74749	-5.267256	bird 38	295.047	905	1362.858967	1.50592151	1533.239055	294.8	23:00:00
14/06/2016	23:28:50	14/06/2016 23:28	51.75267	-5.285139	bird 38	125.3411	914	1550.663602	1.696568493	1727.043639	309	23:00:00
14/06/2016	23:44:04	14/06/2016 23:44	51.74462	-5.26681	bird 38	209.1665	890	693.5371267	0.779255199	1337.844149	316.8	23:00:00
14/06/2016	23:58:54	14/06/2016 23:58	51.73918	-5.271712	bird 38	259.3771	940	812.4035323	0.864259077	751.1813429	318.1	23:00:00
15/06/2016	15:19:56	15/06/2016 15:19	51.75039	-5.273443	bird 38	202.0949	2205	1541.285937	0.69899589	1579.924519	331.1	15:00:00
24/07/2016	02:08:55	24/07/2016 02:08	51.74992	-5.275319	bird 39	253.8	318	147.9018485	0.465100153	1485.833676	203	2:00:00
24/07/2016	02:14:13	24/07/2016 02:14	51.74955	-5.277376	bird 39	261.7529	334	168.7734554	0.505309747	1407.121712	203	2:00:00
24/07/2016	02:19:47	24/07/2016 02:19	51.74933	-5.279794	bird 39	272.2271	363	206.7769373	0.569633436	1353.360356	209.1	2:00:00
24/07/2016	02:25:50	24/07/2016 02:25	51.7494	-5.282786	bird 39	274.5637	307	192.1378782	0.625856281	1351.934526	204.6	2:00:00
24/07/2016	02:30:57	24/07/2016 02:30	51.74954	-5.285559	bird 39	288.7223	307	208.1617574	0.678051327	1386.653002	204.6	2:00:00
24/07/2016	02:36:04	24/07/2016 02:36	51.75014	-5.288414	bird 39	276.2962	310	245.1696328	0.790869783	1496.70657	204.4	2:00:00
24/07/2016	02:41:14	24/07/2016 02:41	51.75038	-5.291943	bird 39	311.9922	305	751.7045949	2.464605229	1607.932532	204.4	2:00:00
24/07/2016	02:46:19	24/07/2016 02:46	51.75489	-5.300048	bird 39	247.825	302	335.5953648	1.11124293	2316.045038	203.7	2:00:00
24/07/2016	02:51:21	24/07/2016 02:51	51.75376	-5.304554	bird 39	234.7119	305	365.910825	1.199707623	2397.294634	203.7	2:00:00
24/07/2016	02:56:26	24/07/2016 02:56	51.75186	-5.308879	bird 39	227.4702	308	445.4657223	1.44631728	2454.095331	206.6	2:00:00
24/07/2016	03:01:34	24/07/2016 03:01	51.74916	-5.313642	bird 39	216.7694	313	538.110962	1.719204351	2539.911812	206.6	3:00:00
24/07/2016	03:06:47	24/07/2016 03:06	51.74529	-5.318315	bird 39	232.2479	313	607.2319949	1.940038322	2644.789892	211.7	3:00:00
24/07/2016	03:12:00	24/07/2016 03:12	51.74195	-5.325268	bird 39	195.6486	321	657.6147444	2.048644063	3013.574746	211.7	3:00:00
24/07/2016	22:50:16	24/07/2016 22:50	51.74002	-5.277432	bird 39	80.58323	305	533.2502261	1.748361397	448.6079385	275.4	22:00:00
24/07/2016	23:00:28	24/07/2016 23:00	51.73103	-5.282349	bird 39	356.9901	305	736.4642671	2.414636941	691.5072397	278.8	23:00:00
05/08/2016	03:24:50	05/08/2016 03:24	51.75298	-5.272805	bird 40	355.2988	279	625.1855482	2.240808416	1864.26509	309.7	3:00:00
05/08/2016	03:29:29	05/08/2016 03:29	51.75858	-5.273549	bird 40	73.74489	282	24.273846	0.086077468	2445.073463	304.1	3:00:00
05/08/2016	03:34:11	05/08/2016 03:34	51.75864	-5.273211	bird 40	17.95369	277	17.53686561	0.063309984	2457.28023	304.1	3:00:00
05/08/2016	03:43:24	05/08/2016 03:43	51.77661	-5.289652	bird 40	51.66987	277	93.32691222	0.336920261	4407.10232	307.3	3:00:00
05/08/2016	03:48:01	05/08/2016 03:48	51.77713	-5.288591	bird 40	31.03988	278	71.43622675	0.256964844	4456.693387	300	3:00:00
05/08/2016	03:52:39	05/08/2016 03:52	51.77768	-5.288057	bird 40	32.29284	278	92.12761444	0.331394297	4514.102484	300	3:00:00
05/08/2016	03:57:17	05/08/2016 03:57	51.77838	-5.287344	bird 40	33.43755	299	114.8366101	0.38406893	4587.555732	305.6	3:00:00
05/08/2016	04:02:16	05/08/2016 04:02	51.77924	-5.286424	bird 40	21.95936	317	101.9583038	0.321635028	4678.506405	305.6	4:00:00
05/08/2016	04:07:33	05/08/2016 04:07	51.78009	-5.285872	bird 40	23.0978	317	117.3590995	0.37021798	4770.65748	293.3	4:00:00
05/08/2016	04:12:50	05/08/2016 04:12	51.78106	-5.285204	bird 40	323.6135	316	415.1099255	1.313639005	4876.177381	293.3	4:00:00
10/08/2016	22:22:32	10/08/2016 22:22	51.74064	-5.276364	bird 40	236.4191	301	571.5686908	1.898899305	549.4066076	291	22:00:00
20/07/2016	02:47:35	20/07/2016 02:47	51.74667	-5.273914	bird 41	347.8071	302	722.8728228	2.393618618	1191.821915	50.19	2:00:00
20/07/2016	02:57:38	20/07/2016 02:57	51.76233	-5.279365	bird 41	47.98805	305	95.82347715	0.314175335	2795.664303	53.94	2:00:00
20/07/2016	03:02:43	20/07/2016 03:02	51.76291	-5.278339	bird 41	37.0612	301	102.3895649	0.340164667	2865.63464	53.94	3:00:00
20/07/2016	03:07:44	20/07/2016 03:07	51.76364	-5.277436	bird 41	359.565	301	299.3058275	0.99437152	2952.67886	51.99	3:00:00
20/07/2016	03:17:46	20/07/2016 03:17	51.77563	-5.283509	bird 41	354.8415	301	93.84577615	0.311779987	4268.903915	43.12	3:00:00
20/07/2016	03:22:47	20/07/2016 03:22	51.77647	-5.283632	bird 41	356.0883	301	124.9082259	0.414977495	4362.473872	43.12	3:00:00
20/07/2016	03:27:48	20/07/2016 03:27	51.77759	-5.283756	bird 41	331.7457	302	528.3280084	1.749430491	4487.179862	15.44	3:00:00
20/07/2016	03:32:50	20/07/2016 03:32	51.78177	-5.287388	bird 41	322.8369	301	395.0854448	1.312576228	4963.670884	15.44	3:00:00
20/07/2016	22:18:44	20/07/2016 22:18	51.76215	-5.298924	bird 41	217.4485	301	267.6214296	0.88910774	2999.714459	266	22:00:00
20/07/2016	22:23:45	20/07/2016 22:23	51.76024	-5.30128	bird 41	224.2241	302	285.8824442	0.94663061	2875.382495	266	22:00:00
20/07/2016	22:28:47	20/07/2016 22:28	51.7584	-5.30417	bird 41	224.0274	302	299.324941	0.991142189	2797.642347	266.3	22:00:00
20/07/2016	22:33:49	20/07/2016 22:33	51.75647	-5.30719	bird 41	225.9812	302	341.408181	1.130490666	2745.287317	266.3	22:00:00
20/07/2016	22:38:51	20/07/2016 22:38	51.75434	-5.310749	bird 41	226.0609	301	391.505877	1.300683977	2735.816257	265.4	22:00:00
20/07/2016	22:43:52	20/07/2016 22:43	51.7519	-5.314834	bird 41	226.7804	301	409.0535051	1.358981745	2777.274233	265.4	22:00:00
20/07/2016	22:48:53	20/07/2016 22:48	51.74939	-5.319162	bird 41	219.5913	301	446.3644563	1.482938393	2882.925174	265.5	22:00:00
20/07/2016	22:53:54	20/07/2016 22:53	51.7463	-5.323284	bird 41	215.3926	301	450.9653265	1.498223676	3004.73192	265.5	22:00:00
20/07/2016	22:58:55	20/07/2016 22:58	51.743	-5.327075	bird 41	207.6374	305	479.8614967	1.573316383	3157.713741	263.9	22:00:00
20/07/2016	23:04:00	20/07/2016 23:04	51.73918	-5.3303	bird 41	201.0571	301	489.0549533	1.624767287	3321.410949	263.9	23:00:00
20/07/2016	23:09:01	20/07/2016 23:09	51.73508	-5.332852	bird 41	193.5034	301	481.7601589	1.600532089	3498.652995	265.1	23:00:00
20/07/2016	23:14:02	20/07/2016 23:14	51.73087	-5.334482	bird 41	195.3074	300	430.3812604	1.434604201	3671.886707	265.1	23:00:00
20/07/2016	23:19:02	20/07/2016 23:19	51.72714	-5.336132	bird 41	185.834	301	475.3383999	1.579197342	3882.76157	263.3	23:00:00
20/07/2016	23:24:03	20/07/2016 23:24	51.72289	-5.336833	bird 41	180.0163	301	483.9898965	1.607939856	4089.494884	263.3	23:00:00
20/07/2016	23:29:04	20/07/2016 23:29	51.71854	-5.336835	bird 41	179.4168	304	452.8598526	1.489670568	4301.720415	260.5	23:00:00
20/07/2016	23:34:08	20/07/2016 23:34	51.71447	-5.336768	bird 41	174.7318	305	432.4136866	1.417749792	4534.20505	260.5	23:00:00
20/07/2016	23:39:13	20/07/2016 23:39	51.7106	-5.336193	bird 41	169.957	305	419.2579415	1.374616202	4756.983301	261	23:00:00
20/07/2016	23:44:18	20/07/2016 23:44	51.70689	-5.335131	bird 41	165.9624	305	420.9359713	1.380117939	4970.495808	261	23:00:00
21/07/2016	20:55:09	21/07/2016 20:55	51.71623	-5.261296	bird 41	309.5686	312	511.039131	1.637945933	2743.724209	162.5	20:00:00
21/07/2016	21:00:21	21/07/2016 21:00	51.71915	-5.267004	bird 41	306.9455	310	474.5735771	1.530882507	2267.176944	162.5	21:00:00
21/07/2016	21:05:31	21/07/2016 21:05	51.72171	-5.272497	bird 41	285.69	333	462.7349955	1.389594581	1851.603882	161.9	21:00:00
21/07/2016	21:11:04	21/07/2016 21:11	51.72283	-5.278946	bird 41	281.8758	417	548.0720021	1.314321348	1618.449608	161.9	21:00:00
21/07/2016	21:18:01	21/07/2016 21:18	51.72384	-5.286709	bird 41	235.6182	304	448.015335	1.473734654	1523.367685	161.9	21:00:00
21/07/2016	21:23:05	21/07/2016 21:23	51.72157	-5.292064	bird 41	259.175	303	450.6830581	1.487402832	1871.853762	161.9	21:00:00
21/07/2016	21:28:08	21/07/2016 21:28	51.72081	-5.29847	bird 41	282.2813	303	370.3510135	1.222280573	2145.190075	162.4	21:00:00
21/07/2016	21:33:11	21/07/2016 21:33	51.72152	-5.303706	bird 41	288.8695	304	339.1922	1.115763816	2293.330841	162.4	21:00:00
21/07/2016	21:38:15	21/07/2016 21:38	51.7225	-5.308354	bird 41	295.9431	305	313.080486	1.026493397	2437.68269	159.7	21:00:00
21/07/2016	21:43:20	21/07/2016 21:43	51.72373	-5.312429	bird 41	304.7483	304	293.7277048	0.966209555	2569.717101	159.7	21:00:00
21/07/2016	21:48:24	21/07/2016 21:48	51.72523	-5.315927	bird 41	311.0042	304	269.7408258	0.887305348	2681.776471	159.3	21:00:00
21/07/2016	21:53:28	21/07/2016 21:53	51.72682	-5.318874	bird 41	314.2158	305	254.1039775	0.833127795	2781.262165	159.3	21:00:00
21/07/2016	21:58:33	21/07/2016 21:58	51.72841	-5.321514	bird 41	320.2289	309	193.0323619	0.6247002	2882.483233	157.1	21:00:00
21/07/2016	22:08:45	21/07/2016 22:08	51.75193	-5.309742	bird 41	277.1182	302	291.8050065	0.966241743	2504.000385	159.3	22:00:00
21/07/2016	22:13:47	21/07/2016 22:13	51.75226	-5.313934	bird 41	265.8745	303	182.9353512	0.603747034	2751.428675	159.3	22:00:00
21/07/2016	22:18:50	21/07/2016 22:18	51.75214	-5.316576	bird 41	263.2601	303	159.6786239	0.526992158	2890.464136	162.6	22:00:00
21/07/2016	22:23:53	21/07/2016 22:23	51.75197	-5.318872	bird 41	276.9191	303	314.9000251	1.03927401	3011.070033	162.6	22:00:00
21/07/2016	22:39:02	21/07/2016 22:39	51.751	-5.285524	bird 41	273.4624	304	149.6381646	0.492230805	1546.555554	159.1	22:00:00
21/07/2016	22:44:06	21/07/2016 22:44	51.75108	-5.287687	bird 41	278.7601	305	155.9668679	0.51136678	1584.350841	159.1	22:00:00
21/07/2016	22:49:11	21/07/2016 22:49	51.75129	-5.28992	bird 41	277.4937	305	176.2716514	0.577939841	1650.172202	160.1	22:00:00
21/07/2016	22:54:16	21/07/2016 22:54	51.7515	-5.29245	bird 41	140.1965	303	693.1602265	2.287657513	1735.761871	160.1	22:00:00
24/07/2016	22:42:26	24/07/2016 22:42	51.75199	-5.298022	bird 42	294.2199	313	376.2397921	1.202044064	1969.507927	269.8	22:00:00
24/07/2016	22:47:39	24/07/2016 22:47	51.75337	-5.302996	bird 42	310.3763	313	403.8403689	1.290224821	2295.759179	275.4	22:00:00
24/07/2016	22:52:52	24/07/2016 22:52	51.75572	-5.307453	bird 42	268.7232	313	629.0165644	2.009637586	2692.5489	275.4	22:00:00
24/07/2016	22:58:05	24/07/2016 22:58	51.75559	-5.31656	bird 42	292.8362	310	496.6216056	1.60200518	3125.189443	278.8	22:00:00
24/07/2016	23:03:15	24/07/2016 23:03	51.75732	-5.32319	bird 42	299.4021	303	304.1263388	1.00371729	3599.748595	278.8	23:00:00
24/07/2016	23:08:18	24/07/2016 23:08	51.75866	-5.327029	bird 42	334.6083	304	382.1183285	1.256968186	3899.739327	280.1	23:00:00
24/07/2016	23:13:22	24/07/2016 23:13	51.76176	-5.329411	bird 42	227.5845	306	763.8425177	2.496217378	4243.504724	280.1	23:00:00
24/07/2016	23:18:28	24/07/2016 23:18	51.75714	-5.337594	bird 42	335.3409	306	227.9470349	0.74492495	4410.667519	280.3	23:00:00
24/07/2016	23:23:34	24/07/2016 23:23	51.759	-5.338978	bird 42	335.6999	308	234.3909413	0.76100955	4598.622441	280.3	23:00:00
24/07/2016	23:28:42	24/07/2016 23:28	51.76092	-5.340375	bird 42	344.5923	307	319.7385967	1.0414938	4794.428345	278.6	23:00:00
26/07/2016	00:50:12	26/07/2016 00:50	51.73104	-5.280003	bird 42	344.0241	2541	761.6714372	0.299752632	706.1593657	265.8	0:00:00
26/07/2016	01:43:01	26/07/2016 01:43	51.74841	-5.27122	bird 42	321.691	1134	665.4218665	0.586791769	1452.045204	278.1	1:00:00
26/07/2016	02:01:55	26/07/2016 02:01	51.7531	-5.277199	bird 42	283.1778	310	151.2114885	0.487778995	1795.537394	281.3	2:00:00
26/07/2016	02:07:05	26/07/2016 02:07	51.75341	-5.279331	bird 42	318.7479	309	279.0596264	0.903105587	1807.714323	274.3	2:00:00
26/07/2016	02:12:14	26/07/2016 02:12	51.75529	-5.282006	bird 42	341.8213	309	568.0961849	1.83849898	2006.227284	274.3	2:00:00
26/07/2016	02:17:23	26/07/2016 02:17	51.76014	-5.284578	bird 42	236.0415	309	182.2636539	0.589850013	2550.905343	267.9	2:00:00
26/07/2016	02:22:32	26/07/2016 02:22	51.75923	-5.286773	bird 42	276.6781	310	212.007155	0.683894048	2464.800964	267.9	2:00:00
26/07/2016	02:32:50	26/07/2016 02:32	51.76062	-5.304757	bird 42	241.4831	308	306.7830143	0.996048748	3028.677971	273.3	2:00:00
26/07/2016	02:37:58	26/07/2016 02:37	51.7593	-5.308658	bird 42	285.5883	308	376.9598879	1.22389574	3055.988946	269.2	2:00:00
26/07/2016	02:43:06	26/07/2016 02:43	51.76021	-5.313917	bird 42	236.5223	311	344.2033563	1.106763204	3361.121165	269.2	2:00:00
26/07/2016	02:48:17	26/07/2016 02:48	51.75851	-5.318082	bird 42	233.3751	309	361.6811683	1.170489218	3421.036957	270.7	2:00:00
26/07/2016	02:53:26	26/07/2016 02:53	51.75657	-5.322285	bird 42	230.2411	309	393.9600939	1.27495176	3499.279088	270.7	2:00:00
26/07/2016	02:58:35	26/07/2016 02:58	51.75431	-5.326677	bird 42	226.0541	312	408.1780467	1.30826297	3604.224928	266.1	2:00:00
26/07/2016	03:03:47	26/07/2016 03:03	51.75177	-5.330942	bird 42	221.6901	305	443.0764619	1.452709711	3726.260357	266.1	3:00:00
26/07/2016	03:13:55	26/07/2016 03:13	51.75165	-5.348825	bird 42	217.5698	304	393.6296035	1.294834222	4860.80077	264.7	3:00:00
26/07/2016	03:18:59	26/07/2016 03:18	51.74885	-5.352309	bird 42	211.1582	304	399.324125	1.313566201	4998.78054	264.5	3:00:00
17/07/2016	18:44:55	17/07/2016 18:44	51.7336	-5.283131	bird 43	53.41407	1525	977.1854208	0.640777325	411.0346107	237.4	18:00:00
17/07/2016	19:10:20	17/07/2016 19:10	51.73883	-5.271767	bird 43	261.0786	1683	710.3525998	0.422075223	737.3136166	230.5	19:00:00
17/07/2016	23:19:44	17/07/2016 23:19	51.74188	-5.27602	bird 43	26.09255	297	13.63456656	0.045907632	666.5995627	178.9	23:00:00
17/07/2016	23:24:41	17/07/2016 23:24	51.74199	-5.275933	bird 43	97.18063	294	204.3360181	0.69502047	679.8602191	178.9	23:00:00
17/07/2016	23:29:35	17/07/2016 23:29	51.74176	-5.272998	bird 43	70.02419	311	506.8995839	1.629902199	806.341568	184.6	23:00:00
17/07/2016	23:34:46	17/07/2016 23:34	51.74331	-5.266097	bird 43	221.2616	315	52.18719993	0.165673651	1295.56287	184.6	23:00:00
17/07/2016	23:40:01	17/07/2016 23:40	51.74296	-5.2666	bird 43	199.3266	294	30.61288636	0.104125464	1245.833309	187.9	23:00:00
17/07/2016	23:44:55	17/07/2016 23:44	51.7427	-5.266745	bird 43	202.357	294	32.5650545	0.110765491	1222.667454	187.9	23:00:00
17/07/2016	23:49:49	17/07/2016 23:49	51.74243	-5.266927	bird 43	160.3526	294	13.01274221	0.044261028	1197.065715	193.4	23:00:00
17/07/2016	23:54:43	17/07/2016 23:54	51.74232	-5.266863	bird 43	137.8074	295	267.2092373	0.905794025	1195.110612	193.4	23:00:00
17/07/2016	23:59:38	17/07/2016 23:59	51.74054	-5.264266	bird 43	184.3473	303	93.73083944	0.309342704	1285.715868	193.1	23:00:00
18/07/2016	00:04:41	18/07/2016 00:04	51.7397	-5.264369	bird 43	171.1796	305	145.2629572	0.476271991	1255.388508	193.1	0:00:00
18/07/2016	00:09:46	18/07/2016 00:09	51.73841	-5.264045	bird 43	136.3329	305	109.561789	0.35921898	1254.420968	199.6	0:00:00
18/07/2016	00:14:51	18/07/2016 00:14	51.7377	-5.262946	bird 43	132.8937	306	124.0544705	0.405406766	1324.387696	199.6	0:00:00
18/07/2016	00:19:57	18/07/2016 00:19	51.73694	-5.261632	bird 43	123.0528	306	137.6436789	0.449815944	1414.340118	195.9	0:00:00
18/07/2016	00:25:03	18/07/2016 00:25	51.73627	-5.259957	bird 43	131.0499	306	167.7789191	0.548297121	1533.137743	202.5	0:00:00
18/07/2016	00:30:09	18/07/2016 00:30	51.73528	-5.258125	bird 43	184.1787	307	182.9566553	0.595950017	1669.845974	202.5	0:00:00
18/07/2016	00:35:16	18/07/2016 00:35	51.73364	-5.258318	bird 43	173.1322	307	263.3656521	0.857868574	1690.478673	204.3	0:00:00
18/07/2016	00:40:23	18/07/2016 00:40	51.73129	-5.257861	bird 43	177.2731	306	315.2320988	1.030170257	1800.043049	204.3	0:00:00
18/07/2016	00:45:29	18/07/2016 00:45	51.72846	-5.257643	bird 43	185.247	306	260.3344939	0.85076632	1951.096376	204.4	0:00:00
18/07/2016	00:50:35	18/07/2016 00:50	51.72613	-5.257988	bird 43	186.8986	306	167.0038559	0.545764235	2073.81232	204.4	0:00:00
18/07/2016	00:55:41	18/07/2016 00:55	51.72464	-5.25828	bird 43	192.3306	308	206.1534188	0.669329282	2161.323308	188	0:00:00
18/07/2016	01:00:49	18/07/2016 01:00	51.72283	-5.258918	bird 43	211.2343	308	123.7022788	0.401630775	2265.748259	188	1:00:00
18/07/2016	01:05:57	18/07/2016 01:05	51.72188	-5.259848	bird 43	239.2867	308	106.6229948	0.346178555	2298.377229	184.2	1:00:00
18/07/2016	01:11:05	18/07/2016 01:11	51.72139	-5.261174	bird 43	275.1409	308	89.62077785	0.290976551	2280.208059	184.2	1:00:00
18/07/2016	01:16:13	18/07/2016 01:16	51.72146	-5.262466	bird 43	281.1789	308	129.5641228	0.420662736	2218.690887	187.9	1:00:00
18/07/2016	01:21:21	18/07/2016 01:21	51.72169	-5.264304	bird 43	300.9338	308	176.1366868	0.57187236	2122.729222	187.9	1:00:00
18/07/2016	01:26:29	18/07/2016 01:26	51.7225	-5.266494	bird 43	301.797	310	160.0197637	0.516192786	1963.189654	180.5	1:00:00
18/07/2016	01:31:39	18/07/2016 01:31	51.72326	-5.26846	bird 43	314.8024	311	244.1967877	0.785198674	1819.376645	180.5	1:00:00
18/07/2016	01:36:50	18/07/2016 01:36	51.7248	-5.270978	bird 43	291.9008	344	297.9444494	0.866117585	1584.124441	179.8	1:00:00
18/07/2016	01:42:34	18/07/2016 01:42	51.7258	-5.274978	bird 43	339.4708	308	78.43775474	0.254668035	1365.79228	179.8	1:00:00
18/07/2016	01:47:42	18/07/2016 01:47	51.72646	-5.275377	bird 43	350.0784	307	67.78281293	0.220790922	1287.433364	171.7	1:00:00
18/07/2016	01:52:49	18/07/2016 01:52	51.72706	-5.275547	bird 43	308.5444	307	74.67520058	0.243241696	1221.090726	171.7	1:00:00
18/07/2016	01:57:56	18/07/2016 01:57	51.72748	-5.27639	bird 43	187.124	311	562.8961893	1.809955593	1156.667351	165.8	1:00:00
18/07/2016	02:03:07	18/07/2016 02:03	51.72246	-5.277402	bird 43	304.8333	309	81.82342434	0.264800726	1676.738353	165.8	2:00:00
18/07/2016	02:08:16	18/07/2016 02:08	51.72288	-5.278374	bird 43	279.093	310	137.7313982	0.444294833	1618.82804	174	2:00:00
18/07/2016	02:13:26	18/07/2016 02:13	51.72308	-5.280341	bird 43	291.1582	310	139.0301342	0.448484304	1580.39398	174	2:00:00
18/07/2016	02:18:36	18/07/2016 02:18	51.72353	-5.282218	bird 43	271.4754	311	134.3723817	0.432065536	1525.357904	177.9	2:00:00
18/07/2016	02:23:47	18/07/2016 02:23	51.72356	-5.284162	bird 43	199.1947	310	183.7988286	0.592899447	1528.216521	177.9	2:00:00
18/07/2016	02:28:57	18/07/2016 02:28	51.722	-5.285037	bird 43	262.2575	309	129.2104844	0.418156908	1706.977325	176.5	2:00:00
18/07/2016	02:34:06	18/07/2016 02:34	51.72184	-5.286889	bird 43	264.2752	309	145.3539505	0.470401134	1743.885733	176.5	2:00:00
18/07/2016	02:39:15	18/07/2016 02:39	51.72171	-5.288982	bird 43	207.3637	308	732.2351654	2.377386901	1790.375822	176.7	2:00:00
18/07/2016	02:44:23	18/07/2016 02:44	51.71587	-5.293867	bird 43	155.593	308	43.90032442	0.142533521	2510.020478	176.7	2:00:00
18/07/2016	02:54:39	18/07/2016 02:54	51.70845	-5.302979	bird 43	205.1044	308	15.82825251	0.05139043	3508.464734	171.2	2:00:00
18/07/2016	02:59:47	18/07/2016 02:59	51.70832	-5.303072	bird 43	196.4148	309	41.8210993	0.135343363	3524.276645	163	2:00:00
18/07/2016	03:04:56	18/07/2016 03:04	51.70796	-5.303246	bird 43	183.8976	305	21.18952138	0.069473841	3565.716328	163	3:00:00
18/07/2016	03:10:01	18/07/2016 03:10	51.70777	-5.303267	bird 43	184.2391	304	568.9944642	1.871692316	3585.609883	155.5	3:00:00
18/07/2016	03:15:05	18/07/2016 03:15	51.70267	-5.303876	bird 43	311.3704	304	48.51129222	0.159576619	4125.503561	156.9	3:00:00
20/07/2016	23:46:17	20/07/2016 23:46	51.75155	-5.280426	bird 43	163.7465	309	381.2871787	1.23393909	1594.830833	262.2	23:00:00
20/07/2016	23:51:26	20/07/2016 23:51	51.74826	-5.278881	bird 43	266.1563	310	139.7212888	0.450713835	1245.202754	262.2	23:00:00
20/07/2016	23:56:36	20/07/2016 23:56	51.74818	-5.2809	bird 43	266.8129	309	144.4132119	0.467356673	1218.719557	263.8	23:00:00
21/07/2016	00:01:45	21/07/2016 00:01	51.74811	-5.282988	bird 43	271.1649	301	164.7485696	0.547337441	1209.144851	263.8	0:00:00
21/07/2016	00:06:46	21/07/2016 00:06	51.74814	-5.285373	bird 43	271.1646	301	170.2723828	0.565688979	1231.12394	262	0:00:00
21/07/2016	00:11:47	21/07/2016 00:11	51.74817	-5.287838	bird 43	273.5532	301	185.4220042	0.616019947	1275.74503	262	0:00:00
21/07/2016	00:16:48	21/07/2016 00:16	51.74827	-5.290518	bird 43	280.0644	302	182.642004	0.604774848	1353.824376	256.8	0:00:00
21/07/2016	00:21:50	21/07/2016 00:21	51.74856	-5.293121	bird 43	101.2917	301	562.6988122	1.86943127	1466.687633	256.8	0:00:00
21/07/2016	00:26:51	21/07/2016 00:26	51.74757	-5.285131	bird 43	107.6743	299	182.3215634	0.609771115	1165.793063	259.5	0:00:00
21/07/2016	00:31:50	21/07/2016 00:31	51.74707	-5.282617	bird 43	284.3012	299	103.4279958	0.34591303	1092.617472	259.5	0:00:00
21/07/2016	00:36:49	21/07/2016 00:36	51.7473	-5.284068	bird 43	281.1594	301	116.3789132	0.386640908	1125.399859	250.8	0:00:00
21/07/2016	00:41:50	21/07/2016 00:41	51.7475	-5.285722	bird 43	287.4298	302	82.58987143	0.273476395	1165.992892	250.8	0:00:00
21/07/2016	00:46:52	21/07/2016 00:46	51.74773	-5.286859	bird 43	300.8253	307	41.4944778	0.135161165	1209.533647	251.4	0:00:00
21/07/2016	00:51:59	21/07/2016 00:51	51.74792	-5.287376	bird 43	268.6494	309	18.95597314	0.061346191	1239.734247	251.4	0:00:00
21/07/2016	00:57:08	21/07/2016 00:57	51.74791	-5.28765	bird 43	142.885	313	5.851099814	0.01869361	1244.264916	242.9	0:00:00
21/07/2016	01:02:21	21/07/2016 01:02	51.74787	-5.287595	bird 43	313.8016	316	11.78159	0.037283513	1238.879745	242.9	1:00:00
21/07/2016	01:07:37	21/07/2016 01:07	51.74794	-5.287723	bird 43	293.798	318	22.1066011	0.069517614	1248.974486	240.1	1:00:00
21/07/2016	01:12:55	21/07/2016 01:12	51.74802	-5.288016	bird 43	277.4899	324	36.06807229	0.111321211	1263.730171	240.1	1:00:00
21/07/2016	01:18:19	21/07/2016 01:18	51.74807	-5.288532	bird 43	102.5647	345	700.2482705	2.029705132	1280.72173	244	1:00:00
21/07/2016	01:24:04	21/07/2016 01:24	51.7467	-5.278636	bird 43	279.4502	393	36.61510554	0.093168207	1078.759905	244	1:00:00
21/07/2016	01:30:37	21/07/2016 01:30	51.74675	-5.27916	bird 43	300.0486	301	45.42276004	0.15090618	1076.665048	243.4	1:00:00
21/07/2016	01:35:38	21/07/2016 01:35	51.74696	-5.279724	bird 43	88.86696	300	645.1783573	2.150594524	1092.94755	241.4	1:00:00
21/07/2016	01:40:38	21/07/2016 01:40	51.74707	-5.270384	bird 43	228.3285	300	85.18891256	0.283963042	1360.459368	241.4	1:00:00
21/07/2016	01:45:38	21/07/2016 01:45	51.74656	-5.271304	bird 43	255.6639	301	54.89765809	0.182384246	1277.280453	242.5	1:00:00
21/07/2016	01:50:39	21/07/2016 01:50	51.74644	-5.272075	bird 43	242.3844	301	49.75332997	0.165293455	1235.884923	242.5	1:00:00
21/07/2016	01:55:40	21/07/2016 01:55	51.74623	-5.272711	bird 43	238.6367	304	50.35986147	0.165657439	1192.180703	245	1:00:00
21/07/2016	02:00:44	21/07/2016 02:00	51.746	-5.273339	bird 43	243.3073	301	44.47715056	0.14776462	1147.361813	245	2:00:00
21/07/2016	02:05:45	21/07/2016 02:05	51.74582	-5.273914	bird 43	218.8959	301	42.76174992	0.142065614	1109.653622	248.6	2:00:00
21/07/2016	02:10:46	21/07/2016 02:10	51.74552	-5.274301	bird 43	256.9783	301	30.17029671	0.100233544	1067.373138	248.6	2:00:00
21/07/2016	02:15:47	21/07/2016 02:15	51.74546	-5.274727	bird 43	246.7648	302	23.57042148	0.078047753	1046.972613	250.2	2:00:00
21/07/2016	02:20:49	21/07/2016 02:20	51.74538	-5.275043	bird 43	238.6328	302	16.66573635	0.055184557	1028.674793	250.2	2:00:00
21/07/2016	02:25:51	21/07/2016 02:25	51.7453	-5.275247	bird 43	285.337	302	11.47773384	0.038005741	1014.191517	245.2	2:00:00
21/07/2016	02:30:53	21/07/2016 02:30	51.74533	-5.275406	bird 43	255.8813	302	8.715060765	0.028857817	1012.056738	245.2	2:00:00
21/07/2016	02:35:55	21/07/2016 02:35	51.74531	-5.275528	bird 43	26.81971	301	34.87615329	0.115867619	1006.239665	246.4	2:00:00
21/07/2016	02:40:56	21/07/2016 02:40	51.74559	-5.275301	bird 43	30.21208	301	32.27452976	0.107224351	1041.075837	246.4	2:00:00
21/07/2016	02:45:57	21/07/2016 02:45	51.74584	-5.275064	bird 43	38.43079	301	58.40203835	0.194026705	1073.254094	247	2:00:00
21/07/2016	02:50:58	21/07/2016 02:50	51.74625	-5.274536	bird 43	10.68701	299	169.8392756	0.568024333	1130.458669	247	2:00:00
21/07/2016	02:55:57	21/07/2016 02:55	51.74775	-5.27408	bird 43	145.6328	300	21.28710317	0.070957011	1293.690281	242.9	2:00:00
22/07/2016	23:25:05	22/07/2016 23:25	51.75921	-5.278811	bird 43	255.8677	302	198.8291357	0.658374622	2452.975474	271.7	23:00:00
22/07/2016	23:30:07	22/07/2016 23:30	51.75877	-5.281602	bird 43	236.9258	305	215.4635824	0.706437975	2393.469907	271.7	23:00:00
22/07/2016	23:35:12	22/07/2016 23:35	51.75772	-5.284224	bird 43	234.9178	307	204.6400926	0.666580106	2280.808242	281.4	23:00:00
22/07/2016	23:40:19	22/07/2016 23:40	51.75666	-5.286646	bird 43	242.2268	306	227.2864556	0.742766195	2180.463524	281.4	23:00:00
22/07/2016	23:45:25	22/07/2016 23:45	51.75571	-5.28956	bird 43	240.5394	307	222.8147466	0.725780934	2115.079559	289.4	23:00:00
22/07/2016	23:50:32	22/07/2016 23:50	51.75473	-5.292374	bird 43	251.4204	306	217.6225824	0.71118491	2067.079236	289.4	23:00:00
23/07/2016	00:01:03	23/07/2016 00:01	51.74402	-5.27866	bird 43	204.5859	305	758.9959249	2.488511229	790.7659595	281.9	0:00:00
23/07/2016	00:26:50	23/07/2016 00:26	51.74429	-5.274184	bird 43	316.7609	308	97.86513798	0.317743954	956.65088	321.3	0:00:00
23/07/2016	00:31:58	23/07/2016 00:31	51.74493	-5.275156	bird 43	316.2226	310	97.20136548	0.313552792	981.1287498	321.3	0:00:00
23/07/2016	00:37:08	23/07/2016 00:37	51.74556	-5.276131	bird 43	87.36135	311	230.2787754	0.740446223	1013.364083	51.48	0:00:00
23/07/2016	00:42:19	23/07/2016 00:42	51.74565	-5.2728	bird 43	307.0603	309	133.265377	0.431279537	1135.205449	51.48	0:00:00
23/07/2016	00:47:28	23/07/2016 00:47	51.74637	-5.274342	bird 43	11.99837	307	95.55370027	0.311249838	1148.494355	298.7	0:00:00
23/07/2016	00:52:35	23/07/2016 00:52	51.74721	-5.274054	bird 43	279.5022	305	152.7869246	0.500940736	1240.564312	298.7	0:00:00
23/07/2016	00:57:40	23/07/2016 00:57	51.74744	-5.276235	bird 43	288.8794	308	141.9284608	0.460806691	1204.629459	268.3	0:00:00
23/07/2016	01:02:48	23/07/2016 01:02	51.74785	-5.278181	bird 43	286.9172	302	135.5524379	0.448849132	1210.404877	268.3	1:00:00
23/07/2016	01:07:50	23/07/2016 01:07	51.7482	-5.280061	bird 43	281.8997	304	142.4339526	0.468532739	1226.414169	223	1:00:00
23/07/2016	01:12:54	23/07/2016 01:12	51.74847	-5.282077	bird 43	283.441	305	185.0766896	0.606808818	1247.862713	223	1:00:00
23/07/2016	01:17:59	23/07/2016 01:17	51.74885	-5.284686	bird 43	282.6678	305	160.8290119	0.527308236	1301.722209	197.2	1:00:00
23/07/2016	01:33:04	23/07/2016 01:33	51.75784	-5.250837	bird 43	230.0884	299	154.3653037	0.516271919	3145.564792	186.6	1:00:00
23/07/2016	01:38:03	23/07/2016 01:38	51.75695	-5.252552	bird 43	227.6118	303	156.3768105	0.516095084	2992.641662	185.6	1:00:00
23/07/2016	01:43:06	23/07/2016 01:43	51.756	-5.254221	bird 43	232.703	304	141.6148177	0.465838216	2837.074516	185.6	1:00:00
23/07/2016	01:48:10	23/07/2016 01:48	51.75523	-5.255854	bird 43	239.9475	304	122.9305507	0.404376812	2698.033433	213.2	1:00:00
23/07/2016	01:53:14	23/07/2016 01:53	51.75468	-5.257398	bird 43	234.7076	304	115.6163662	0.380316994	2581.624607	213.2	1:00:00
23/07/2016	01:58:18	23/07/2016 01:58	51.75408	-5.258765	bird 43	236.3275	309	117.1558141	0.379145029	2469.520736	203.9	1:00:00
23/07/2016	02:03:27	23/07/2016 02:03	51.7535	-5.260181	bird 43	239.3895	305	113.6757962	0.372707528	2357.264757	203.9	2:00:00
23/07/2016	02:08:32	23/07/2016 02:08	51.75298	-5.261598	bird 43	239.7909	315	102.0798833	0.324063122	2250.617763	202.6	2:00:00
23/07/2016	02:13:47	23/07/2016 02:13	51.75252	-5.262877	bird 43	264.1407	311	54.63115758	0.175662886	2155.767848	202.6	2:00:00
23/07/2016	02:18:58	23/07/2016 02:18	51.75247	-5.263664	bird 43	252.2505	312	71.17418259	0.22812238	2118.375172	198.6	2:00:00
23/07/2016	02:24:10	23/07/2016 02:24	51.75227	-5.264643	bird 43	262.7348	308	90.80302951	0.294815031	2060.475988	198.6	2:00:00
23/07/2016	02:29:18	23/07/2016 02:29	51.75217	-5.265948	bird 43	262.3338	311	64.42621039	0.207158233	1999.958234	193.7	2:00:00
23/07/2016	02:34:29	23/07/2016 02:34	51.75209	-5.266872	bird 43	274.526	312	38.19637633	0.122424283	1957.647007	193.7	2:00:00
23/07/2016	02:39:41	23/07/2016 02:39	51.75212	-5.267423	bird 43	45.35707	308	635.7186906	2.064021723	1940.349451	188.2	2:00:00
23/07/2016	02:44:49	23/07/2016 02:44	51.75613	-5.260865	bird 43	228.5492	312	53.48427495	0.171423958	2561.003855	188.2	2:00:00
23/07/2016	02:50:01	23/07/2016 02:50	51.75581	-5.261443	bird 43	228.9971	316	46.34115855	0.146649236	2509.079776	174.7	2:00:00
23/07/2016	02:55:17	23/07/2016 02:55	51.75554	-5.261954	bird 43	255.2526	311	31.90044898	0.102573791	2464.410438	173.8	2:00:00
23/07/2016	03:00:28	23/07/2016 03:00	51.75547	-5.262402	bird 43	346.3877	311	43.54653733	0.14002102	2440.663067	173.8	3:00:00
23/07/2016	03:05:39	23/07/2016 03:05	51.75585	-5.262553	bird 43	328.3051	321	53.57975268	0.166915117	2470.153136	175.8	3:00:00
23/07/2016	03:11:00	23/07/2016 03:11	51.75626	-5.26296	bird 43	298.5386	319	7.731709645	0.024237334	2493.479488	175.8	3:00:00
27/07/2016	22:56:47	27/07/2016 22:56	51.73916	-5.274191	bird 43	256.638	335	642.6280925	1.918292813	588.8311221	232.1	22:00:00
28/07/2016	03:33:40	28/07/2016 03:33	51.7251	-5.32927	bird 43	66.99412	1425	3556.461183	2.495762234	3514.025061	206.6	3:00:00
24/07/2016	00:24:02	24/07/2016 00:24	51.74591	-5.270865	bird 44	281.2533	296	222.3845284	0.751299082	1238.192216	215.3	0:00:00
24/07/2016	00:28:58	24/07/2016 00:28	51.7463	-5.274023	bird 44	7.306071	296	62.82882313	0.212259538	1152.152153	213.1	0:00:00
24/07/2016	00:33:54	24/07/2016 00:33	51.74686	-5.273906	bird 44	202.2227	295	105.840881	0.358782647	1210.694061	213.1	0:00:00
24/07/2016	00:38:49	24/07/2016 00:38	51.74598	-5.274488	bird 44	287.7235	297	95.25160396	0.320712471	1105.539657	210.3	0:00:00
24/07/2016	00:43:46	24/07/2016 00:43	51.74624	-5.275802	bird 44	338.7381	297	183.8747893	0.619107035	1091.664356	210.3	0:00:00
24/07/2016	00:48:43	24/07/2016 00:48	51.74778	-5.276768	bird 44	280.4901	297	128.6630346	0.433208871	1228.670485	211.8	0:00:00
24/07/2016	00:53:40	24/07/2016 00:53	51.74799	-5.2786	bird 44	112.1621	297	93.8299251	0.315925674	1219.438744	211.8	0:00:00
24/07/2016	00:58:37	24/07/2016 00:58	51.74767	-5.277343	bird 44	339.6596	308	176.8330175	0.574133174	1205.518458	216.9	0:00:00
24/07/2016	01:03:45	24/07/2016 01:03	51.74916	-5.278234	bird 44	90.99942	322	121.4300269	0.377111885	1351.946456	216.9	1:00:00
24/07/2016	01:09:07	24/07/2016 01:09	51.74914	-5.276476	bird 44	284.781	323	168.1779479	0.520674761	1379.147864	220.2	1:00:00
24/07/2016	01:14:30	24/07/2016 01:14	51.74952	-5.278833	bird 44	280.148	323	200.7641322	0.621560781	1383.756263	220.2	1:00:00
24/07/2016	01:19:53	24/07/2016 01:19	51.74984	-5.281694	bird 44	272.0736	322	222.0958301	0.689738603	1400.561037	212.6	1:00:00
24/07/2016	01:25:15	24/07/2016 01:25	51.74991	-5.284908	bird 44	238.3709	319	75.1687515	0.235638719	1420.574237	211.4	1:00:00
24/07/2016	01:30:34	24/07/2016 01:30	51.74956	-5.285839	bird 44	266.8031	323	197.9645719	0.612893412	1392.218045	211.4	1:00:00
24/07/2016	01:35:57	24/07/2016 01:35	51.74946	-5.288701	bird 44	281.516	324	307.3262145	0.948537699	1430.54378	207.8	1:00:00
24/07/2016	01:41:21	24/07/2016 01:41	51.75001	-5.293062	bird 44	274.0462	366	415.986911	1.136576259	1605.195769	207.8	1:00:00
24/07/2016	01:47:27	24/07/2016 01:47	51.75027	-5.299071	bird 44	247.7879	529	1212.497276	2.292055343	1857.811846	200.9	1:00:00
24/07/2016	02:06:31	24/07/2016 02:06	51.73387	-5.332136	bird 44	203.5307	687	1690.019423	2.45999916	3461.518291	203	2:00:00
24/07/2016	20:16:19	24/07/2016 20:16	51.75571	-5.278215	bird 44	101.844	312	228.2172771	0.731465632	2070.835893	247.3	20:00:00
24/07/2016	20:21:31	24/07/2016 20:21	51.75529	-5.27498	bird 44	117.6912	313	212.0562866	0.677496123	2066.286724	247.3	20:00:00
24/07/2016	20:26:44	24/07/2016 20:26	51.75441	-5.272256	bird 44	138.8407	316	200.8215044	0.63551109	2026.627259	251.2	20:00:00
24/07/2016	20:32:00	24/07/2016 20:32	51.75305	-5.270344	bird 44	171.2402	316	154.2380253	0.488095017	1936.456663	251.2	20:00:00
24/07/2016	20:37:16	24/07/2016 20:37	51.75168	-5.270003	bird 44	198.8491	318	151.7397446	0.477169008	1810.11296	253.3	20:00:00
24/07/2016	20:42:34	24/07/2016 20:42	51.75039	-5.270716	bird 44	220.4219	316	204.8299387	0.648196009	1660.396376	253.3	20:00:00
24/07/2016	20:47:50	24/07/2016 20:47	51.74899	-5.272642	bird 44	296.3625	317	285.6445027	0.901086759	1461.062803	251.3	20:00:00
24/07/2016	20:53:07	24/07/2016 20:53	51.75013	-5.276348	bird 44	239.6639	344	258.3913862	0.751137751	1487.374087	251.3	20:00:00
24/07/2016	20:58:51	24/07/2016 20:58	51.74896	-5.27958	bird 44	246.184	315	269.9028663	0.856834496	1314.442355	254.6	20:00:00
24/07/2016	21:04:06	24/07/2016 21:04	51.74798	-5.283155	bird 44	309.658	308	414.1389134	1.344606862	1195.305839	254.6	21:00:00
24/07/2016	21:09:14	24/07/2016 21:09	51.75035	-5.287779	bird 44	300.7653	307	314.1519989	1.023296413	1507.288347	257.2	21:00:00
24/07/2016	21:14:21	24/07/2016 21:14	51.75179	-5.291692	bird 44	282.374	308	262.0049098	0.850665291	1744.97301	257.2	21:00:00
24/07/2016	21:19:29	24/07/2016 21:19	51.7523	-5.295396	bird 44	290.0809	308	278.6740668	0.904785931	1905.54286	255	21:00:00
24/07/2016	21:24:37	24/07/2016 21:24	51.75315	-5.299192	bird 44	299.2883	308	313.9732901	1.019393799	2121.511868	255	21:00:00
24/07/2016	21:29:45	24/07/2016 21:29	51.75453	-5.303158	bird 44	306.4559	308	318.4980118	1.034084454	2404.511671	251.1	21:00:00
24/07/2016	21:34:53	24/07/2016 21:34	51.75623	-5.306869	bird 44	317.9663	308	294.0170239	0.954600727	2710.644135	251.1	21:00:00
24/07/2016	21:40:01	24/07/2016 21:40	51.75819	-5.309725	bird 44	322.6093	309	252.1578105	0.816044694	3003.734386	257.8	21:00:00
24/07/2016	21:45:10	24/07/2016 21:45	51.75999	-5.311944	bird 44	330.9573	308	247.1976636	0.802589817	3255.379515	262	21:00:00
24/07/2016	21:50:18	24/07/2016 21:50	51.76193	-5.313689	bird 44	332.0059	308	225.5690341	0.732366994	3498.830976	262	21:00:00
24/07/2016	21:55:26	24/07/2016 21:55	51.76372	-5.315223	bird 44	338.7907	310	233.9996607	0.754837615	3720.652118	260.6	21:00:00
24/07/2016	22:10:50	24/07/2016 22:10	51.74418	-5.276432	bird 44	140.1037	305	622.6693207	2.041538756	866.0305968	263.2	22:00:00
20/07/2016	01:35:42	20/07/2016 01:35	51.74229	-5.276936	bird 45	17.79665	307	88.8307741	0.289351056	666.3309433	48.74	1:00:00
20/07/2016	01:40:49	20/07/2016 01:40	51.74305	-5.276542	bird 45	347.6356	305	134.3970784	0.440646159	752.4428661	48.74	1:00:00
20/07/2016	01:45:54	20/07/2016 01:45	51.74423	-5.276958	bird 45	7.879623	302	657.1248261	2.17591002	855.1769394	296.5	1:00:00
20/07/2016	01:50:56	20/07/2016 01:50	51.75008	-5.27565	bird 45	350.9556	301	268.1674006	0.890921597	1495.724144	296.5	1:00:00
20/07/2016	01:55:57	20/07/2016 01:55	51.75246	-5.276263	bird 45	2.890076	305	229.4945023	0.752440991	1739.643819	313.2	1:00:00
20/07/2016	02:01:02	20/07/2016 02:01	51.75452	-5.276095	bird 45	1.602211	309	245.9875153	0.796076101	1965.522448	313.2	2:00:00
20/07/2016	02:06:11	20/07/2016 02:06	51.75673	-5.275995	bird 45	32.53228	310	87.01280913	0.280686481	2207.575237	318.4	2:00:00
20/07/2016	02:11:21	20/07/2016 02:11	51.75739	-5.275319	bird 45	1.046463	310	674.3658059	2.175373568	2288.764468	318.4	2:00:00
20/07/2016	02:16:31	20/07/2016 02:16	51.76345	-5.27514	bird 45	359.5629	309	515.1622488	1.667191744	2953.414188	340.5	2:00:00
20/07/2016	02:26:49	20/07/2016 02:26	51.77556	-5.276311	bird 45	7.191761	309	233.2701641	0.754919625	4279.133851	337	2:00:00
20/07/2016	02:31:58	20/07/2016 02:31	51.77764	-5.275887	bird 45	37.10334	311	99.14303467	0.318787893	4512.144661	337	2:00:00
20/07/2016	02:37:09	20/07/2016 02:37	51.77835	-5.275019	bird 45	4.018159	311	51.30671748	0.164973368	4596.744547	30.47	2:00:00
20/07/2016	02:42:20	20/07/2016 02:42	51.77881	-5.274967	bird 45	16.56404	311	81.2828024	0.261359493	4647.98364	30.47	2:00:00
20/07/2016	02:47:31	20/07/2016 02:47	51.77951	-5.27463	bird 45	24.8748	312	106.6592919	0.341856705	4727.871701	50.19	2:00:00
20/07/2016	02:52:43	20/07/2016 02:52	51.78038	-5.273981	bird 45	330.523	312	91.05003363	0.291827031	4829.045148	50.19	2:00:00
20/07/2016	02:57:55	20/07/2016 02:57	51.78109	-5.274637	bird 45	12.75074	313	111.7866849	0.357145958	4902.485364	53.94	2:00:00
20/07/2016	22:01:49	20/07/2016 22:01	51.77515	-5.288013	bird 45	161.4014	308	658.7115827	2.13867397	4233.704243	269.9	22:00:00
20/07/2016	22:06:57	20/07/2016 22:06	51.76954	-5.284964	bird 45	190.0451	311	215.8408905	0.694022156	3595.888809	266.7	22:00:00
20/07/2016	22:17:18	20/07/2016 22:17	51.75757	-5.279367	bird 45	198.5077	308	306.3481814	0.994636953	2267.919229	266	22:00:00
20/07/2016	22:22:26	20/07/2016 22:22	51.75496	-5.28078	bird 45	161.9309	310	310.1835596	1.000592128	1971.811135	266	22:00:00
20/07/2016	22:27:36	20/07/2016 22:27	51.75231	-5.279385	bird 45	219.1068	312	115.1121902	0.368949328	1685.740407	266.3	22:00:00
20/07/2016	22:32:48	20/07/2016 22:32	51.75151	-5.280442	bird 45	216.7296	335	169.1718194	0.504990506	1590.313063	266.3	22:00:00
20/07/2016	22:38:23	20/07/2016 22:38	51.75029	-5.281904	bird 45	250.2625	312	87.90598699	0.281749958	1450.334309	265.4	22:00:00
20/07/2016	22:43:35	20/07/2016 22:43	51.75003	-5.283106	bird 45	271.9846	334	122.419588	0.366525713	1422.786515	265.4	22:00:00
20/07/2016	22:49:09	20/07/2016 22:49	51.75006	-5.284878	bird 45	126.2831	332	260.9930964	0.786123784	1436.837205	265.5	22:00:00
20/07/2016	22:54:41	20/07/2016 22:54	51.74868	-5.281822	bird 45	270.7287	364	166.8573456	0.458399301	1271.418668	265.5	22:00:00
20/07/2016	23:00:45	20/07/2016 23:00	51.74869	-5.284238	bird 45	279.7793	340	190.462707	0.560184432	1280.288185	263.9	23:00:00
20/07/2016	23:06:25	20/07/2016 23:06	51.74898	-5.286956	bird 45	273.0203	340	203.3451644	0.598074013	1345.608005	265.1	23:00:00
20/07/2016	23:12:05	20/07/2016 23:12	51.74908	-5.289896	bird 45	26.76842	320	511.2049864	1.597515583	1419.260748	265.1	23:00:00
20/07/2016	23:17:25	20/07/2016 23:17	51.75318	-5.286555	bird 45	251.9477	339	252.2251436	0.744026972	1797.16819	263.3	23:00:00
20/07/2016	23:23:04	20/07/2016 23:23	51.75248	-5.290029	bird 45	254.7438	388	362.4915682	0.934256619	1778.161667	263.3	23:00:00
20/07/2016	23:29:32	20/07/2016 23:29	51.75162	-5.295092	bird 45	254.2395	312	378.8555863	1.214280725	1829.213416	260.5	23:00:00
20/07/2016	23:34:44	20/07/2016 23:34	51.7507	-5.300374	bird 45	244.7733	311	499.839697	1.607201598	1951.689016	260.5	23:00:00
20/07/2016	23:39:55	20/07/2016 23:39	51.74879	-5.306925	bird 45	231.5482	310	625.0525427	2.016298525	2133.834803	261	23:00:00
20/07/2016	23:45:05	20/07/2016 23:45	51.7453	-5.314017	bird 45	221.2281	309	696.0588143	2.252617522	2368.821533	262.2	23:00:00
20/07/2016	23:50:14	20/07/2016 23:50	51.7406	-5.320668	bird 45	214.2883	309	693.1164517	2.243095313	2677.247275	262.2	23:00:00
20/07/2016	23:55:23	20/07/2016 23:55	51.73546	-5.326337	bird 45	199.8602	311	699.3308419	2.248652225	3048.185181	263.8	23:00:00
21/07/2016	00:00:34	21/07/2016 00:00	51.72955	-5.329783	bird 45	187.348	311	744.9175576	2.395233304	3389.078193	263.8	0:00:00
21/07/2016	00:05:45	21/07/2016 00:05	51.72291	-5.331164	bird 45	179.4126	308	725.4667652	2.355411575	3732.211196	262	0:00:00
21/07/2016	00:10:53	21/07/2016 00:10	51.71639	-5.331056	bird 45	171.6718	309	703.9408552	2.278125745	4088.789632	262	0:00:00
21/07/2016	00:16:02	21/07/2016 00:16	51.71013	-5.329579	bird 45	167.0659	309	662.1954735	2.143027422	4445.025814	256.8	0:00:00
21/07/2016	00:21:11	21/07/2016 00:21	51.70433	-5.32743	bird 45	161.841	311	645.4117821	2.075279042	4808.31602	256.8	0:00:00
21/07/2016	19:42:05	21/07/2016 19:42	51.76218	-5.312049	bird 45	336.2056	312	335.5773612	1.075568465	3452.230834	167.6	19:00:00
21/07/2016	19:47:17	21/07/2016 19:47	51.76494	-5.314009	bird 45	346.685	314	345.3927936	1.09997705	3779.786666	165.6	19:00:00
21/07/2016	19:52:31	21/07/2016 19:52	51.76796	-5.315167	bird 45	357.515	314	375.3099564	1.195254638	4101.598144	165.6	19:00:00
21/07/2016	19:57:45	21/07/2016 19:57	51.77133	-5.315403	bird 45	6.612913	314	357.3291763	1.137991007	4426.807234	164.6	19:00:00
21/07/2016	20:02:59	21/07/2016 20:02	51.77452	-5.314804	bird 45	16.52147	303	316.8019445	1.045550972	4714.198882	164.6	20:00:00
21/07/2016	20:08:02	21/07/2016 20:08	51.77725	-5.3135	bird 45	27.30682	303	287.0637225	0.947405025	4943.331444	159.7	20:00:00
21/07/2016	20:58:16	21/07/2016 20:58	51.76805	-5.283082	bird 45	180.7524	315	488.4863256	1.55075024	3425.625631	162.5	20:00:00
21/07/2016	21:03:31	21/07/2016 21:03	51.76366	-5.283175	bird 45	234.3386	321	233.7302825	0.728131721	2937.721019	162.5	21:00:00
21/07/2016	21:08:52	21/07/2016 21:08	51.76244	-5.285931	bird 45	241.5601	325	248.3128546	0.764039553	2813.209644	161.9	21:00:00
21/07/2016	21:14:17	21/07/2016 21:14	51.76138	-5.289096	bird 45	246.2298	324	254.2599353	0.784752887	2725.459938	161.9	21:00:00
21/07/2016	21:19:41	21/07/2016 21:19	51.76046	-5.292467	bird 45	249.0651	329	270.4151089	0.821930422	2676.730381	161.9	21:00:00
21/07/2016	21:25:10	21/07/2016 21:25	51.75959	-5.296124	bird 45	254.397	329	275.1838163	0.836424973	2663.707389	162.4	21:00:00
21/07/2016	21:30:39	21/07/2016 21:30	51.75893	-5.299965	bird 45	159.6552	328	123.5225906	0.376593264	2704.480489	162.4	21:00:00
21/07/2016	21:36:07	21/07/2016 21:36	51.75789	-5.299339	bird 45	337.9625	333	78.15190494	0.234690405	2581.906931	159.7	21:00:00
21/07/2016	21:41:40	21/07/2016 21:41	51.75854	-5.299768	bird 45	271.4251	395	291.8959219	0.738977017	2659.689507	159.7	21:00:00
21/07/2016	22:54:01	21/07/2016 22:54	51.71947	-5.290151	bird 45	15.63656	1163	2144.809498	1.844204211	2051.889274	160.1	22:00:00
20/07/2016	01:14:54	20/07/2016 01:14	51.74276	-5.275601	bird 46	291.7123	305	53.99679729	0.17703868	761.5615078	50.62	1:00:00
20/07/2016	01:19:59	20/07/2016 01:19	51.74294	-5.276327	bird 46	312.7941	365	73.80141416	0.202195655	749.8138336	60.01	1:00:00
20/07/2016	01:26:04	20/07/2016 01:26	51.74339	-5.277112	bird 46	333.41	431	74.56737593	0.173010153	766.5043037	68.2	1:00:00
20/07/2016	01:33:15	20/07/2016 01:33	51.74399	-5.277593	bird 46	282.67	301	38.5075426	0.127932035	813.1175723	68.2	1:00:00
20/07/2016	01:38:16	20/07/2016 01:38	51.74406	-5.278139	bird 46	329.1834	300	85.42760588	0.284758686	806.6182025	48.74	1:00:00
20/07/2016	01:43:16	20/07/2016 01:43	51.74472	-5.278771	bird 46	342.4759	300	303.4121405	1.011373802	863.1129253	48.74	1:00:00
20/07/2016	01:53:14	20/07/2016 01:53	51.75793	-5.279027	bird 46	19.83701	297	720.5819684	2.426201914	2309.878903	296.5	1:00:00
21/07/2016	20:47:44	21/07/2016 20:47	51.78011	-5.284248	bird 46	189.5222	333	190.684445	0.572625961	4768.210295	162	20:00:00
21/07/2016	20:53:17	21/07/2016 20:53	51.77842	-5.284707	bird 46	198.5413	391	255.8392726	0.65432039	4581.476845	162	20:00:00
21/07/2016	20:59:48	21/07/2016 20:59	51.77624	-5.285886	bird 46	210.3174	435	304.5421791	0.700096963	4343.287237	162.5	20:00:00
21/07/2016	21:07:03	21/07/2016 21:07	51.77388	-5.288121	bird 46	219.2173	460	343.2324444	0.746157488	4093.886565	161.9	21:00:00
21/07/2016	21:14:43	21/07/2016 21:14	51.77149	-5.291265	bird 46	225.2479	309	221.5333742	0.716936486	3858.730075	161.9	21:00:00
21/07/2016	21:19:52	21/07/2016 21:19	51.77009	-5.293547	bird 46	235.1608	309	226.7065002	0.733677994	3734.974102	161.9	21:00:00
21/07/2016	21:25:01	21/07/2016 21:25	51.76893	-5.296247	bird 46	234.721	309	246.3575374	0.797273584	3653.814757	162.4	21:00:00
21/07/2016	21:30:10	21/07/2016 21:30	51.76765	-5.299159	bird 46	239.3406	309	254.0621978	0.82220776	3577.234808	162.4	21:00:00
21/07/2016	21:35:19	21/07/2016 21:35	51.76649	-5.302329	bird 46	240.7679	309	260.9283385	0.84442828	3535.440118	159.7	21:00:00
21/07/2016	21:40:28	21/07/2016 21:40	51.76535	-5.305632	bird 46	240.2926	309	244.8489794	0.792391519	3517.668772	159.7	21:00:00
21/07/2016	21:45:37	21/07/2016 21:45	51.76426	-5.308713	bird 46	243.3758	308	246.4911633	0.800295985	3515.891736	159.3	21:00:00
21/07/2016	21:50:45	21/07/2016 21:50	51.76327	-5.311907	bird 46	246.5568	308	254.5650488	0.826509899	3544.628178	159.3	21:00:00
21/07/2016	21:55:53	21/07/2016 21:55	51.76236	-5.31529	bird 46	248.3823	312	240.1517147	0.769717034	3605.136255	157.1	21:00:00
21/07/2016	22:01:05	21/07/2016 22:01	51.76157	-5.318527	bird 46	247.919	312	236.5292898	0.758106698	3685.12961	157.1	22:00:00
21/07/2016	22:06:17	21/07/2016 22:06	51.76077	-5.321701	bird 46	248.2525	314	235.2551656	0.749220273	3774.744477	159.3	22:00:00
21/07/2016	22:11:31	21/07/2016 22:11	51.75999	-5.324868	bird 46	251.1885	312	237.6889473	0.761823549	3877.753557	159.3	22:00:00
21/07/2016	22:16:43	21/07/2016 22:16	51.7593	-5.328126	bird 46	253.2731	311	236.3566819	0.759989331	4002.99513	162.6	22:00:00
21/07/2016	22:32:12	21/07/2016 22:32	51.74221	-5.280361	bird 46	193.632	314	554.2233747	1.765042594	565.5829362	160.6	22:00:00
22/07/2016	02:26:22	22/07/2016 02:26	51.74832	-5.274513	bird 47	324.0489	305	77.03690297	0.25258001	1339.169627	155.7	2:00:00
22/07/2016	02:31:27	22/07/2016 02:31	51.74888	-5.275169	bird 47	329.4575	305	71.23485068	0.233556887	1380.225836	155.7	2:00:00
22/07/2016	02:36:32	22/07/2016 02:36	51.74943	-5.275697	bird 47	325.5844	306	77.02645785	0.25172045	1425.926232	154.9	2:00:00
22/07/2016	02:41:38	22/07/2016 02:41	51.75	-5.27633	bird 47	5.796749	306	77.1598445	0.252156355	1473.795375	154.9	2:00:00
22/07/2016	02:46:44	22/07/2016 02:46	51.75069	-5.276218	bird 47	4.402464	308	64.7289302	0.210158864	1549.774036	158.8	2:00:00
22/07/2016	02:51:52	22/07/2016 02:51	51.75127	-5.276145	bird 47	14.59926	310	78.15922912	0.252126546	1613.348579	158.8	2:00:00
22/07/2016	02:57:02	22/07/2016 02:57	51.75195	-5.275861	bird 47	9.822436	312	82.4462097	0.264250672	1691.445839	158.7	2:00:00
22/07/2016	03:02:14	22/07/2016 03:02	51.75268	-5.275656	bird 47	31.23082	309	191.2331815	0.61887761	1773.535481	158.7	3:00:00
22/07/2016	03:07:23	22/07/2016 03:07	51.75415	-5.274221	bird 47	58.32537	313	23.35165381	0.074605923	1957.40287	158	3:00:00
23/07/2016	19:07:01	23/07/2016 19:07	51.77316	-5.283425	bird 47	44.46749	310	327.3673552	1.056023726	3994.191704	236.6	19:00:00
23/07/2016	19:22:30	23/07/2016 19:22	51.75646	-5.249434	bird 47	90.39685	313	112.557139	0.359607473	3105.080735	237.6	19:00:00
23/07/2016	19:27:43	23/07/2016 19:27	51.75645	-5.247804	bird 47	93.49703	314	106.0641607	0.337783951	3186.70816	246.4	19:00:00
23/07/2016	19:32:57	23/07/2016 19:32	51.75639	-5.246271	bird 47	93.41553	315	119.7811742	0.380257696	3261.462614	246.4	19:00:00
23/07/2016	19:38:12	23/07/2016 19:38	51.75633	-5.244539	bird 47	106.5544	315	110.6747971	0.351348562	3348.481023	245.8	19:00:00
23/07/2016	19:43:27	23/07/2016 19:43	51.75605	-5.243001	bird 47	125.7458	316	84.84627275	0.268500863	3411.888831	245.8	19:00:00
23/07/2016	19:48:43	23/07/2016 19:48	51.7556	-5.242009	bird 47	135.5178	339	115.5457068	0.340842793	3436.172779	247.6	19:00:00
23/07/2016	19:54:22	23/07/2016 19:54	51.75486	-5.240835	bird 47	166.5085	345	100.7352279	0.291986168	3454.241446	247.6	19:00:00
23/07/2016	20:00:07	23/07/2016 20:00	51.75398	-5.240492	bird 47	167.2207	355	109.5277392	0.308528843	3419.532255	252.3	20:00:00
23/07/2016	20:06:02	23/07/2016 20:06	51.75302	-5.240141	bird 47	189.7445	339	67.74636618	0.199841788	3383.313276	240.8	20:00:00
23/07/2016	20:11:41	23/07/2016 20:11	51.75242	-5.240308	bird 47	350.6527	373	127.4334035	0.341644513	3339.304857	240.8	20:00:00
23/07/2016	20:25:01	23/07/2016 20:25	51.74905	-5.259267	bird 47	293.9264	406	484.6215014	1.193649018	2051.293514	237.4	20:00:00
23/07/2016	20:31:47	23/07/2016 20:31	51.75081	-5.265686	bird 47	296.6287	312	202.6915039	0.649652256	1887.193838	237.4	20:00:00
23/07/2016	20:36:59	23/07/2016 20:36	51.75162	-5.268315	bird 47	252.2051	312	123.4013299	0.395517083	1860.988556	236.4	20:00:00
23/07/2016	20:42:11	23/07/2016 20:42	51.75129	-5.270021	bird 47	261.208	312	153.2362744	0.491141905	1771.196067	236.4	20:00:00
23/07/2016	20:47:23	23/07/2016 20:47	51.75108	-5.272214	bird 47	266.0603	312	173.6991567	0.556728066	1683.767182	234.5	20:00:00
23/07/2016	20:52:35	23/07/2016 20:52	51.75097	-5.274723	bird 47	286.4278	311	511.6613171	1.645213238	1609.574422	234.5	20:00:00
23/07/2016	20:57:46	23/07/2016 20:57	51.75227	-5.28183	bird 47	277.1677	311	204.76895	0.658421061	1670.548199	225.9	20:00:00
23/07/2016	21:02:57	23/07/2016 21:02	51.7525	-5.284772	bird 47	283.452	304	210.2657361	0.691663606	1705.43169	225.9	21:00:00
23/07/2016	21:08:01	23/07/2016 21:08	51.75293	-5.287737	bird 47	283.4962	306	215.0768637	0.702865568	1785.469368	234.5	21:00:00
23/07/2016	21:13:07	23/07/2016 21:13	51.75338	-5.290766	bird 47	282.8037	306	213.0870935	0.696363051	1889.017354	234.5	21:00:00
23/07/2016	21:18:13	23/07/2016 21:18	51.75381	-5.293773	bird 47	119.4257	307	360.9426448	1.175708941	2007.543865	220.3	21:00:00
23/07/2016	21:23:20	23/07/2016 21:23	51.75222	-5.289217	bird 47	282.1024	307	195.0965779	0.635493739	1734.172587	220.3	21:00:00
23/07/2016	21:28:27	23/07/2016 21:28	51.75258	-5.291982	bird 47	280.18	306	197.0822108	0.644059513	1833.935454	224.7	21:00:00
23/07/2016	21:33:33	23/07/2016 21:33	51.7529	-5.294789	bird 47	282.2421	306	202.9182538	0.663131548	1945.373558	224.7	21:00:00
23/07/2016	21:43:45	23/07/2016 21:43	51.74953	-5.283476	bird 47	26.91174	326	242.1420307	0.742766965	1368.692196	217.5	21:00:00
23/07/2016	21:49:11	23/07/2016 21:49	51.75147	-5.281887	bird 47	210.9528	328	377.6894734	1.151492297	1581.548807	211.6	21:00:00
23/07/2016	21:54:39	23/07/2016 21:54	51.74856	-5.284703	bird 47	271.1973	328	181.6639989	0.553853655	1269.931396	211.6	21:00:00
23/07/2016	22:00:07	23/07/2016 22:00	51.74859	-5.287333	bird 47	215.0474	384	182.2220054	0.474536473	1310.416837	194.3	22:00:00
05/08/2016	03:12:08	05/08/2016 03:12	51.71726	-5.29014	bird 48	233.3706	295	210.9505192	0.715086506	2289.406764	313	3:00:00
05/08/2016	03:21:57	05/08/2016 03:21	51.71067	-5.319304	bird 48	211.148	295	384.9691813	1.304980275	3908.680681	309.7	3:00:00
05/08/2016	03:26:52	05/08/2016 03:26	51.70771	-5.322188	bird 48	260.0492	299	558.8892522	1.869194823	4288.10144	304.1	3:00:00
08/08/2016	22:25:00	08/08/2016 22:25	51.73233	-5.274966	bird 48	317.4783	306	711.764757	2.326028618	738.1225019	319.9	22:00:00
09/08/2016	01:06:04	09/08/2016 01:06	51.74204	-5.28205	bird 48	11.83441	800	59.148396	0.073935495	532.9237379	340	1:00:00
09/08/2016	01:19:24	09/08/2016 01:19	51.74256	-5.281872	bird 48	5.530913	682	51.41514271	0.075388772	591.0312389	340.3	1:00:00
09/08/2016	01:30:46	09/08/2016 01:30	51.74302	-5.281801	bird 48	180.2504	697	615.2870399	0.882764763	642.3257798	343.6	1:00:00
25/07/2016	01:58:05	25/07/2016 01:58	51.74289	-5.277808	bird 49	343.6726	309	589.1353684	1.906586953	695.4308867	290.5	1:00:00
25/07/2016	02:03:14	25/07/2016 02:03	51.74797	-5.280214	bird 49	311.3927	307	293.1272799	0.954811987	1199.797008	290.5	2:00:00
25/07/2016	02:08:21	25/07/2016 02:08	51.74971	-5.283401	bird 49	293.1481	307	252.2230721	0.821573525	1388.33838	289	2:00:00
25/07/2016	02:13:28	25/07/2016 02:13	51.7506	-5.28676	bird 49	323.4258	307	434.147603	1.414161573	1518.018823	289	2:00:00
25/07/2016	21:58:31	25/07/2016 21:58	51.75921	-5.288764	bird 49	173.8814	314	185.7635982	0.591603816	2483.972355	247	21:00:00
25/07/2016	22:03:45	25/07/2016 22:03	51.75755	-5.288476	bird 49	210.7414	311	208.4230476	0.670170571	2298.921564	247	22:00:00
25/07/2016	22:08:56	25/07/2016 22:08	51.75594	-5.290019	bird 49	242.2682	311	260.0591143	0.83620294	2147.648013	248.9	22:00:00
25/07/2016	22:14:07	25/07/2016 22:14	51.75486	-5.293359	bird 49	211.7863	316	255.2428364	0.807730495	2104.553296	248.9	22:00:00
25/07/2016	22:29:54	25/07/2016 22:29	51.74258	-5.275798	bird 49	24.80383	317	126.4565815	0.398916661	737.4033129	253.1	22:00:00
25/07/2016	22:35:11	25/07/2016 22:35	51.74361	-5.275024	bird 49	271.0062	316	509.6733377	1.612890309	861.5451933	245.8	22:00:00
25/07/2016	22:40:27	25/07/2016 22:40	51.74369	-5.282402	bird 49	179.2961	317	706.5699575	2.228927311	716.5213268	245.8	22:00:00
26/07/2016	02:58:56	26/07/2016 02:58	51.75366	-5.28263	bird 49	300.7081	312	365.3788194	1.171085959	1825.229821	266.1	2:00:00
26/07/2016	03:04:08	26/07/2016 03:04	51.75533	-5.287186	bird 49	263.9184	310	272.6372207	0.879474905	2040.138488	266.1	3:00:00
26/07/2016	03:09:18	26/07/2016 03:09	51.75507	-5.291112	bird 49	297.3159	309	650.0313508	2.103661329	2075.246774	264.7	3:00:00
26/07/2016	03:14:27	26/07/2016 03:14	51.75775	-5.299477	bird 49	250.6817	310	380.886891	1.22866739	2572.466082	264.7	3:00:00
26/07/2016	03:19:37	26/07/2016 03:19	51.75662	-5.304684	bird 49	245.0701	310	462.2213842	1.491036723	2653.955512	264.5	3:00:00
26/07/2016	03:24:47	26/07/2016 03:24	51.75487	-5.310755	bird 49	237.0526	310	529.020627	1.706518152	2777.365127	264.5	3:00:00
26/07/2016	03:29:57	26/07/2016 03:29	51.75229	-5.31719	bird 49	225.7445	310	609.4086784	1.965834447	2934.683241	261	3:00:00
26/07/2016	03:35:07	26/07/2016 03:35	51.74847	-5.323514	bird 49	215.5691	309	622.9441194	2.016000386	3108.362092	259.5	3:00:00
26/07/2016	03:45:25	26/07/2016 03:45	51.73669	-5.342737	bird 49	199.1007	309	638.3614512	2.065894664	4171.418771	261.2	3:00:00
26/07/2016	03:50:34	26/07/2016 03:50	51.73127	-5.345768	bird 49	194.9225	309	633.3829742	2.049783088	4430.085874	261.2	3:00:00
26/07/2016	03:55:43	26/07/2016 03:55	51.72577	-5.348133	bird 49	191.7572	310	647.86656	2.089892129	4718.941675	256.5	3:00:00
26/07/2016	20:36:52	26/07/2016 20:36	51.75391	-5.320122	bird 49	31.80872	300	263.4990943	0.878330314	3203.349163	221.7	20:00:00
26/07/2016	20:41:52	26/07/2016 20:41	51.75592	-5.318104	bird 49	33.64453	301	266.3841018	0.884997016	3229.937664	221.7	20:00:00
26/07/2016	20:46:53	26/07/2016 20:46	51.75791	-5.315959	bird 49	36.15149	300	277.0729567	0.923576522	3269.730812	221	20:00:00
26/07/2016	20:51:53	26/07/2016 20:51	51.75992	-5.31359	bird 49	33.86015	300	269.5326424	0.898442141	3321.992014	221	20:00:00
26/07/2016	20:56:53	26/07/2016 20:56	51.76193	-5.311411	bird 49	33.37554	308	269.2682397	0.874247532	3403.789306	217.4	20:00:00
26/07/2016	21:02:01	26/07/2016 21:02	51.76395	-5.309263	bird 49	34.86701	312	259.4532518	0.831580935	3506.487215	217.4	21:00:00
26/07/2016	21:07:13	26/07/2016 21:07	51.76586	-5.307107	bird 49	37.59628	311	245.4590877	0.789257517	3615.23741	219.5	21:00:00
26/07/2016	21:12:24	26/07/2016 21:12	51.76761	-5.304942	bird 49	125.0064	311	735.1067538	2.363687311	3722.412982	219.5	21:00:00
26/07/2016	21:17:35	26/07/2016 21:17	51.76382	-5.29622	bird 49	119.521	310	610.8033659	1.970333439	3109.061737	222.8	21:00:00
26/07/2016	21:22:45	26/07/2016 21:22	51.76112	-5.288517	bird 49	66.46268	310	246.4035839	0.794850271	2690.235475	222.8	21:00:00
26/07/2016	21:33:06	26/07/2016 21:33	51.75632	-5.276149	bird 49	100.0317	310	204.8829748	0.660912822	2160.79818	234.3	21:00:00
26/07/2016	21:38:16	26/07/2016 21:38	51.756	-5.273227	bird 49	152.776	310	381.7764594	1.231536966	2174.053567	236	21:00:00
26/07/2016	21:43:26	26/07/2016 21:43	51.75295	-5.270694	bird 49	147.0434	310	235.195912	0.75869649	1916.316845	236	21:00:00
26/07/2016	21:48:36	26/07/2016 21:48	51.75118	-5.268832	bird 49	136.8098	310	135.9105718	0.438421199	1800.745603	236.4	21:00:00
26/07/2016	21:53:46	26/07/2016 21:53	51.75029	-5.267484	bird 49	153.2966	310	102.079975	0.329290242	1767.733216	236.4	21:00:00
26/07/2016	21:58:56	26/07/2016 21:58	51.74947	-5.266821	bird 49	175.3208	313	99.35281457	0.317421133	1721.37087	235.8	21:00:00
26/07/2016	22:04:09	26/07/2016 22:04	51.74858	-5.266704	bird 49	198.4462	306	95.06380568	0.310666032	1649.553913	235.8	22:00:00
26/07/2016	22:14:23	26/07/2016 22:14	51.74051	-5.277948	bird 49	356.996	306	295.2511518	0.964873045	464.6598334	232	22:00:00
26/07/2016	22:19:29	26/07/2016 22:19	51.74316	-5.278172	bird 49	302.6413	308	72.47746553	0.235316447	712.5902696	235.9	22:00:00
26/07/2016	22:24:37	26/07/2016 22:24	51.74351	-5.279057	bird 49	301.4824	308	130.985443	0.425277412	728.4718743	235.9	22:00:00
26/07/2016	22:29:45	26/07/2016 22:29	51.74412	-5.280679	bird 49	281.5909	308	173.1713637	0.562244687	770.9732458	234.1	22:00:00
26/07/2016	22:34:53	26/07/2016 22:34	51.74443	-5.283136	bird 49	270.581	307	209.4272378	0.682173413	801.4116458	234.1	22:00:00
14/06/2016	22:40:34	14/06/2016 22:40	51.7471	-5.26941	bird 50	179.2289	925	92.35627144	0.099844618	1404.080493	297.4	22:00:00
14/06/2016	22:55:59	14/06/2016 22:55	51.74627	-5.269392	bird 50	222.4402	957	1340.817913	1.40106365	1334.143585	298.5	22:00:00
01/06/2016	02:04:32	01/06/2016 02:04	51.74486	-5.279953	bird 51	306.8044	917	869.1919856	0.947864761	860.0325789	358.7	2:00:00
01/06/2016	02:35:05	01/06/2016 02:35	51.76305	-5.328603	bird 51	316.4423	917	1623.403298	1.770341655	4295.442217	3.472	2:00:00
12/06/2016	21:23:45	12/06/2016 21:23	51.77257	-5.281002	bird 51	103.6403	929	126.0909994	0.135727664	3928.461891	244.8	21:00:00
12/06/2016	21:39:14	12/06/2016 21:39	51.77231	-5.279224	bird 51	135.1098	934	215.1169111	0.230317892	3903.988499	263	21:00:00
12/06/2016	21:54:48	12/06/2016 21:54	51.77094	-5.277025	bird 51	161.4403	928	327.4786965	0.352886526	3763.069968	263.4	21:00:00
12/06/2016	22:10:16	12/06/2016 22:10	51.76815	-5.275514	bird 51	172.7373	924	226.587195	0.245224237	3466.533649	266.7	22:00:00
12/06/2016	22:25:40	12/06/2016 22:25	51.76613	-5.275097	bird 51	141.9002	927	232.1545401	0.250436397	3248.20061	268.7	22:00:00
17/07/2016	01:57:04	17/07/2016 01:57	51.74276	-5.273608	bird 52	15.75201	308	176.9079193	0.574376361	850.21226	263.4	1:00:00
17/07/2016	02:02:12	17/07/2016 02:02	51.74429	-5.272911	bird 52	11.36362	305	481.257464	1.577893324	1009.555275	263.4	2:00:00
17/07/2016	02:12:21	17/07/2016 02:12	51.76376	-5.274821	bird 52	62.32209	313	151.7803861	0.484921361	2991.057877	260.5	2:00:00
17/07/2016	02:17:34	17/07/2016 02:17	51.76439	-5.272871	bird 52	18.19235	319	175.7088077	0.55081131	3085.144761	260.3	2:00:00
17/07/2016	02:22:53	17/07/2016 02:22	51.76589	-5.272075	bird 52	11.59874	320	621.3434541	1.941698294	3259.727816	260.3	2:00:00
17/07/2016	02:28:13	17/07/2016 02:28	51.77136	-5.270262	bird 52	45.34261	329	191.7947539	0.582962778	3880.5858	254.6	2:00:00
17/07/2016	02:33:42	17/07/2016 02:33	51.77257	-5.268283	bird 52	34.44611	339	143.1342978	0.422225067	4042.214694	254.6	2:00:00
17/07/2016	02:39:21	17/07/2016 02:39	51.77363	-5.267108	bird 52	31.8435	420	174.2510274	0.414883398	4176.164925	247.6	2:00:00
23/07/2016	22:37:14	23/07/2016 22:37	51.73919	-5.279786	bird 52	217.599	360	271.0767705	0.752991029	271.0761529	212.4	22:00:00
24/07/2016	03:14:28	24/07/2016 03:14	51.7488	-5.276988	bird 53	279.4984	295	131.0684542	0.444299845	1333.086022	211.7	3:00:00
24/07/2016	03:19:23	24/07/2016 03:19	51.74899	-5.278861	bird 53	265.4587	292	101.4056034	0.347279464	1325.342651	214.9	3:00:00
24/07/2016	03:29:08	24/07/2016 03:29	51.76216	-5.295185	bird 53	228.7691	293	163.505361	0.558038775	2911.494472	212.8	3:00:00
24/07/2016	03:34:01	24/07/2016 03:34	51.76119	-5.296964	bird 53	220.137	294	144.2946886	0.49079826	2850.512411	212.8	3:00:00
24/07/2016	03:38:55	24/07/2016 03:38	51.7602	-5.298314	bird 53	218.7659	294	141.5250804	0.481377825	2783.778826	210.8	3:00:00
24/07/2016	03:43:49	24/07/2016 03:43	51.75921	-5.299601	bird 53	222.6083	294	134.9104404	0.458879049	2721.124325	210.8	3:00:00
24/07/2016	03:48:43	24/07/2016 03:48	51.75832	-5.300928	bird 53	269.1321	294	447.9084719	1.523498204	2675.564281	211.9	3:00:00
24/07/2016	03:53:37	24/07/2016 03:53	51.75825	-5.307414	bird 53	278.7153	293	174.5346419	0.595681372	2911.208221	211.9	3:00:00
24/07/2016	03:58:30	24/07/2016 03:58	51.75849	-5.309912	bird 53	196.945	333	141.9421175	0.426252605	3037.743666	218.9	3:00:00
24/07/2016	04:04:03	24/07/2016 04:04	51.75727	-5.310513	bird 53	198.1012	311	127.5886082	0.410252759	2960.627815	218.9	4:00:00
24/07/2016	04:09:14	24/07/2016 04:09	51.75618	-5.311087	bird 53	196.1317	310	134.3815501	0.433488871	2897.623467	216.9	4:00:00
24/07/2016	04:14:24	24/07/2016 04:14	51.75502	-5.311629	bird 53	192.1715	310	133.1912026	0.429649041	2831.938728	216.9	4:00:00
24/07/2016	04:19:34	24/07/2016 04:19	51.75385	-5.312037	bird 53	186.529	309	133.2712988	0.431298702	2763.596026	219.2	4:00:00
24/07/2016	04:24:43	24/07/2016 04:24	51.75266	-5.312257	bird 53	177.7584	308	133.6182776	0.433825577	2688.691213	219.2	4:00:00
24/07/2016	23:54:41	24/07/2016 23:54	51.75021	-5.284242	bird 53	302.4967	340	141.5304021	0.416265889	1448.400777	280.7	23:00:00
25/07/2016	00:00:21	25/07/2016 00:00	51.75089	-5.285974	bird 53	299.8848	310	131.502577	0.424201861	1539.436309	281.4	0:00:00
25/07/2016	00:05:31	25/07/2016 00:05	51.75148	-5.287624	bird 53	290.8647	311	131.504985	0.422845611	1626.556411	283.6	0:00:00
25/07/2016	00:10:42	25/07/2016 00:10	51.7519	-5.289404	bird 53	296.5714	311	130.0123407	0.418046112	1703.764069	283.6	0:00:00
25/07/2016	00:15:53	25/07/2016 00:15	51.75242	-5.29109	bird 53	288.8842	311	131.5560501	0.423009808	1795.47612	287	0:00:00
25/07/2016	00:21:04	25/07/2016 00:21	51.7528	-5.292894	bird 53	271.382	310	157.3716672	0.507650539	1880.463091	287	0:00:00
25/07/2016	00:26:14	25/07/2016 00:26	51.75284	-5.295172	bird 53	292.5384	310	219.4383952	0.707865791	1951.366176	296.6	0:00:00
25/07/2016	00:31:24	25/07/2016 00:31	51.75359	-5.298111	bird 53	263.4547	309	204.4978709	0.661805407	2123.033979	296.6	0:00:00
25/07/2016	00:36:33	25/07/2016 00:36	51.75338	-5.301053	bird 53	255.4049	310	226.5409208	0.730777164	2215.55971	298.6	0:00:00
25/07/2016	00:41:43	25/07/2016 00:41	51.75287	-5.304229	bird 53	263.7972	309	228.0961883	0.738175367	2307.590958	298.6	0:00:00
25/07/2016	00:46:52	25/07/2016 00:46	51.75265	-5.307513	bird 53	265.2501	310	257.2062183	0.829697478	2445.119558	296.7	0:00:00
25/07/2016	00:52:02	25/07/2016 00:52	51.75246	-5.311225	bird 53	254.8696	310	226.4460568	0.730471151	2619.923395	296.7	0:00:00
25/07/2016	00:57:12	25/07/2016 00:57	51.75193	-5.314391	bird 53	254.1312	314	269.1758352	0.857247883	2754.607218	293.2	0:00:00
25/07/2016	01:02:26	25/07/2016 01:02	51.75127	-5.318141	bird 53	252.7101	307	302.2085653	0.984392721	2926.774823	293.2	1:00:00
25/07/2016	01:07:33	25/07/2016 01:07	51.75046	-5.322318	bird 53	243.8727	307	263.5038631	0.858318772	3130.607975	293.7	1:00:00
25/07/2016	01:12:40	25/07/2016 01:12	51.74942	-5.325746	bird 53	237.3619	306	326.9738332	1.068541939	3291.675575	293.7	1:00:00
25/07/2016	01:17:46	25/07/2016 01:17	51.74784	-5.329738	bird 53	235.9007	305	348.0431202	1.141124984	3480.765221	299.7	1:00:00
25/07/2016	01:22:51	25/07/2016 01:22	51.74609	-5.333915	bird 53	232.6055	304	320.779659	1.055196247	3696.268737	299.7	1:00:00
25/07/2016	01:27:55	25/07/2016 01:27	51.74434	-5.337606	bird 53	226.704	305	312.1888849	1.023570114	3897.922013	301.7	1:00:00
25/07/2016	01:33:00	25/07/2016 01:33	51.74242	-5.340902	bird 53	226.4358	305	303.6660973	0.995626549	4085.030295	301.7	1:00:00
25/07/2016	01:38:05	25/07/2016 01:38	51.74054	-5.344089	bird 53	222.3542	306	308.0448409	1.006682487	4279.560172	299.5	1:00:00
25/07/2016	01:43:11	25/07/2016 01:43	51.7385	-5.347104	bird 53	220.357	306	291.7771842	0.95352021	4473.746645	299.5	1:00:00
25/07/2016	01:48:17	25/07/2016 01:48	51.7365	-5.349836	bird 53	219.8275	307	301.8388416	0.983188409	4660.546115	298	1:00:00
25/07/2016	01:53:24	25/07/2016 01:53	51.73442	-5.352641	bird 53	216.8651	307	300.6147851	0.979201255	4863.244462	298	1:00:00
25/07/2016	22:13:28	25/07/2016 22:13	51.74067	-5.27571	bird 53	230.011	298	601.7525327	2.019303801	585.1333417	248.9	22:00:00
26/07/2016	02:50:04	26/07/2016 02:50	51.76004	-5.299654	bird 53	251.6794	307	304.4509843	0.991697017	2805.806348	270.7	2:00:00
26/07/2016	02:55:11	26/07/2016 02:55	51.75918	-5.30384	bird 53	259.799	310	396.0877634	1.277702463	2859.014164	266.1	2:00:00
26/07/2016	03:00:21	26/07/2016 03:00	51.75855	-5.309486	bird 53	236.6027	311	426.6814542	1.371966091	3024.609696	266.1	3:00:00
26/07/2016	03:10:43	26/07/2016 03:10	51.76039	-5.325515	bird 53	293.8092	309	716.4127374	2.318487823	3940.518539	264.7	3:00:00
26/07/2016	03:15:52	26/07/2016 03:15	51.76298	-5.335015	bird 53	225.5877	311	344.1036447	1.106442587	4628.51838	264.5	3:00:00
26/07/2016	03:21:03	26/07/2016 03:21	51.76082	-5.338582	bird 53	221.0159	312	343.9578064	1.102428867	4685.525505	264.5	3:00:00
26/07/2016	03:26:15	26/07/2016 03:26	51.75849	-5.341856	bird 53	217.801	312	362.1288308	1.16066933	4739.777669	261	3:00:00
26/07/2016	03:31:27	26/07/2016 03:31	51.75592	-5.345074	bird 53	285.2943	311	769.7409567	2.475051308	4802.92007	261	3:00:00
26/07/2016	21:35:47	26/07/2016 21:35	51.77811	-5.289545	bird 53	35.48719	299	192.8859347	0.645103461	4571.967233	236	21:00:00
26/07/2016	21:50:42	26/07/2016 21:50	51.75265	-5.268932	bird 53	189.1767	298	639.0960742	2.144617699	1939.905108	236.4	21:00:00
02/06/2016	01:58:34	02/06/2016 01:58	51.7402	-5.278297	bird 54	8.283589	898	1971.107836	2.194997591	422.7415487	38.84	1:00:00
02/06/2016	02:13:32	02/06/2016 02:13	51.75773	-5.274174	bird 54	340.5517	2360	3607.117653	1.528439684	2343.019617	38.74	2:00:00
18/07/2016	00:00:51	18/07/2016 00:00	51.77909	-5.307697	bird 55	145.1926	301	137.0228973	0.455225572	4973.43517	193.1	0:00:00
18/07/2016	00:15:52	18/07/2016 00:15	51.74896	-5.2962	bird 55	175.649	301	185.2324297	0.615390132	1621.662464	195.9	0:00:00
18/07/2016	00:25:54	18/07/2016 00:25	51.7435	-5.281757	bird 55	162.7467	299	492.9769522	1.648752349	695.7775859	202.5	0:00:00
18/07/2016	00:30:53	18/07/2016 00:30	51.73927	-5.279633	bird 55	38.67531	299	497.9524121	1.665392683	284.5465666	202.5	0:00:00
18/07/2016	00:35:52	18/07/2016 00:35	51.74276	-5.27512	bird 55	49.87876	302	72.52544699	0.240150487	781.6728341	204.3	0:00:00
18/07/2016	00:40:54	18/07/2016 00:40	51.74318	-5.274317	bird 55	80.54555	304	49.51808241	0.162888429	852.7262357	204.3	0:00:00
18/07/2016	00:45:58	18/07/2016 00:45	51.74325	-5.273609	bird 55	164.3155	305	19.66692289	0.064481714	890.2447449	204.4	0:00:00
18/07/2016	00:51:03	18/07/2016 00:51	51.74308	-5.273531	bird 55	146.0048	305	102.2000012	0.335081971	879.7836115	204.4	0:00:00
18/07/2016	00:56:08	18/07/2016 00:56	51.74232	-5.2727	bird 55	241.0875	306	351.3652611	1.148252487	861.8985952	188	0:00:00
18/07/2016	01:01:14	18/07/2016 01:01	51.74079	-5.27715	bird 55	219.9565	304	226.9139875	0.746427591	523.829658	188	1:00:00
18/07/2016	01:06:18	18/07/2016 01:06	51.73923	-5.279266	bird 55	7.480862	301	533.0631502	1.770973921	297.3857256	184.2	1:00:00
18/07/2016	01:11:19	18/07/2016 01:11	51.74398	-5.278258	bird 55	34.22592	305	91.53715472	0.300121819	795.4619589	184.2	1:00:00
18/07/2016	01:16:24	18/07/2016 01:16	51.74466	-5.277512	bird 55	46.74081	311	67.9383834	0.218451394	884.2834688	187.9	1:00:00
18/07/2016	01:21:35	18/07/2016 01:21	51.74508	-5.276798	bird 55	171.4608	312	86.629955	0.277660112	946.0656174	187.9	1:00:00
18/07/2016	01:26:47	18/07/2016 01:26	51.74431	-5.276612	bird 55	144.4608	334	340.6197428	1.019819589	873.4247254	180.5	1:00:00
18/07/2016	01:32:21	18/07/2016 01:32	51.74182	-5.273743	bird 55	185.7713	301	199.0715224	0.661367184	771.2298051	180.5	1:00:00
18/07/2016	01:37:22	18/07/2016 01:37	51.74004	-5.274035	bird 55	31.76646	309	114.081453	0.369195641	640.1672086	179.8	1:00:00
18/07/2016	01:42:31	18/07/2016 01:42	51.74091	-5.273161	bird 55	26.39762	311	109.2907638	0.351417247	741.7823965	179.8	1:00:00
18/07/2016	01:47:42	18/07/2016 01:47	51.74179	-5.272458	bird 55	37.62278	316	113.8421047	0.360259825	837.7760892	171.7	1:00:00
18/07/2016	01:52:58	18/07/2016 01:52	51.7426	-5.271451	bird 55	32.67991	313	116.7240864	0.372920404	947.8673482	171.7	1:00:00
18/07/2016	01:58:11	18/07/2016 01:58	51.74348	-5.270531	bird 55	26.68911	320	146.8969818	0.459053068	1059.228601	165.8	1:00:00
18/07/2016	02:03:31	18/07/2016 02:03	51.74466	-5.269577	bird 55	23.88627	316	107.228606	0.339331032	1196.065286	165.8	2:00:00
18/07/2016	02:08:47	18/07/2016 02:08	51.74554	-5.268944	bird 55	20.86321	320	142.8397123	0.446374101	1295.717097	174	2:00:00
18/07/2016	02:14:07	18/07/2016 02:14	51.74674	-5.268209	bird 55	24.39191	325	131.998793	0.406150132	1427.384874	174	2:00:00
18/07/2016	02:19:32	18/07/2016 02:19	51.74782	-5.267418	bird 55	16.66191	307	150.9840515	0.491804728	1553.372461	177.9	2:00:00
18/07/2016	02:24:39	18/07/2016 02:24	51.74912	-5.266791	bird 55	355.3764	306	123.9067807	0.40492412	1692.107106	177.9	2:00:00
18/07/2016	02:29:45	18/07/2016 02:29	51.75023	-5.266936	bird 55	24.19945	328	224.751544	0.685218122	1784.173236	176.5	2:00:00
18/07/2016	02:35:13	18/07/2016 02:35	51.75207	-5.265593	bird 55	24.81077	320	464.6512213	1.452035067	2004.553627	176.7	2:00:00
18/07/2016	02:40:33	18/07/2016 02:40	51.75586	-5.262767	bird 55	37.73569	334	154.8557858	0.463640077	2463.064969	176.7	2:00:00
18/07/2016	02:46:07	18/07/2016 02:46	51.75696	-5.261393	bird 55	31.54314	333	141.2046394	0.424037956	2617.151886	171.2	2:00:00
18/07/2016	02:51:40	18/07/2016 02:51	51.75804	-5.260319	bird 55	32.55246	335	185.0932886	0.552517279	2758.123474	171.2	2:00:00
18/07/2016	02:57:15	18/07/2016 02:57	51.75944	-5.258871	bird 55	31.05334	315	177.7757708	0.564367526	2942.960232	163	2:00:00
23/07/2016	23:10:26	23/07/2016 23:10	51.73927	-5.27847	bird 55	229.9887	322	309.3097936	0.960589421	339.57127	183.5	23:00:00
24/07/2016	01:59:38	24/07/2016 01:59	51.74986	-5.276568	bird 55	317.3454	303	134.7344896	0.444668283	1454.396479	202.8	1:00:00
24/07/2016	02:04:41	24/07/2016 02:04	51.75075	-5.277891	bird 55	261.7345	299	177.6766403	0.594236255	1529.942897	202.8	2:00:00
24/07/2016	02:09:40	24/07/2016 02:09	51.75052	-5.280437	bird 55	270.0009	302	162.9105043	0.539438756	1480.587431	203	2:00:00
27/07/2016	03:11:34	27/07/2016 03:11	51.75308	-5.27901	bird 56	243.4719	316	132.2993991	0.418668985	1773.809756	263.4	3:00:00
27/07/2016	03:16:50	27/07/2016 03:16	51.75255	-5.280725	bird 56	258.4501	319	127.5845096	0.399951441	1704.410628	263.2	3:00:00
27/07/2016	03:22:09	27/07/2016 03:22	51.75232	-5.282535	bird 56	256.5505	327	142.4922261	0.435756043	1676.141492	263.2	3:00:00
27/07/2016	03:27:36	27/07/2016 03:27	51.75202	-5.284541	bird 56	264.3578	1010	696.0995778	0.689207503	1650.712517	263.1	3:00:00
27/07/2016	03:44:26	27/07/2016 03:44	51.75141	-5.294573	bird 56	247.8684	1076	1580.263698	1.46864656	1791.538521	264.9	3:00:00
27/07/2016	04:02:22	27/07/2016 04:02	51.74607	-5.315776	bird 56	224.35	309	598.0578207	1.935462203	2513.517279	265.3	4:00:00
27/07/2016	04:07:31	27/07/2016 04:07	51.74223	-5.321835	bird 56	226.7179	308	582.9511401	1.892698507	2787.09263	265.4	4:00:00
27/07/2016	04:12:39	27/07/2016 04:12	51.73864	-5.327982	bird 56	250.1321	308	427.9778585	1.389538502	3158.656383	265.4	4:00:00
27/07/2016	23:40:34	27/07/2016 23:40	51.74339	-5.281118	bird 56	185.5485	325	653.9666176	2.012204977	686.7748003	221.3	23:00:00
18/07/2016	01:55:57	18/07/2016 01:55	51.7299	-5.281282	bird 57	217.1524	303	135.8421648	0.448323976	819.3036814	165.8	1:00:00
18/07/2016	02:01:00	18/07/2016 02:01	51.72893	-5.282476	bird 57	232.4905	308	122.3953572	0.397387523	925.148289	165.8	2:00:00
18/07/2016	02:11:15	18/07/2016 02:11	51.72058	-5.288419	bird 57	206.312	309	96.81517748	0.313317726	1902.7648	174	2:00:00
18/07/2016	02:16:24	18/07/2016 02:16	51.7198	-5.28904	bird 57	219.9144	309	136.6212114	0.442139843	1997.049263	177.9	2:00:00
18/07/2016	02:26:41	18/07/2016 02:26	51.71259	-5.303256	bird 57	165.3604	310	91.98925349	0.296739527	3102.886212	176.5	2:00:00
18/07/2016	02:31:51	18/07/2016 02:31	51.71179	-5.30292	bird 57	193.3173	311	29.774783	0.095738852	3171.269763	176.5	2:00:00
18/07/2016	02:37:02	18/07/2016 02:37	51.71153	-5.303022	bird 57	211.7439	312	84.92109129	0.272182985	3200.252447	176.7	2:00:00
18/07/2016	02:47:23	18/07/2016 02:47	51.70072	-5.31895	bird 57	161.4467	309	72.85490914	0.235776405	4787.338483	171.2	2:00:00
18/07/2016	02:52:32	18/07/2016 02:52	51.7001	-5.318611	bird 57	206.7401	310	58.45953375	0.188579141	4833.805754	171.2	2:00:00
18/07/2016	02:57:42	18/07/2016 02:57	51.69963	-5.318989	bird 57	192.5287	314	93.47139952	0.297679616	4891.999209	163	2:00:00
18/07/2016	03:02:56	18/07/2016 03:02	51.69881	-5.319283	bird 57	230.4604	310	92.4582388	0.298252383	4980.566827	163	3:00:00
18/07/2016	19:18:07	18/07/2016 19:18	51.71774	-5.319091	bird 57	228.7615	312	189.408344	0.607078026	3342.651136	39.9	19:00:00
18/07/2016	19:23:19	18/07/2016 19:23	51.71662	-5.321155	bird 57	212.8657	313	266.491254	0.851409757	3531.653688	39.9	19:00:00
18/07/2016	19:28:32	18/07/2016 19:28	51.71461	-5.323252	bird 57	227.4522	314	297.6892984	0.94805509	3787.447882	38.38	19:00:00
18/07/2016	19:33:46	18/07/2016 19:33	51.7128	-5.326424	bird 57	241.9439	315	219.3594504	0.696379208	4084.502076	38.38	19:00:00
18/07/2016	19:39:01	18/07/2016 19:39	51.71188	-5.329231	bird 57	242.2896	315	224.9866975	0.714243484	4297.230985	26.64	19:00:00
18/07/2016	19:44:16	18/07/2016 19:44	51.71094	-5.332113	bird 57	263.5303	315	211.8879225	0.672660071	4515.916935	26.64	19:00:00
18/07/2016	19:49:31	18/07/2016 19:49	51.71072	-5.335158	bird 57	270.3088	316	228.6510328	0.723579218	4693.019915	24.95	19:00:00
18/07/2016	19:54:47	18/07/2016 19:54	51.71073	-5.338466	bird 57	277.4297	316	237.3365853	0.751065143	4871.67116	24.95	19:00:00
18/07/2016	20:36:34	18/07/2016 20:36	51.71764	-5.339617	bird 57	337.2058	311	127.9241269	0.411331598	4517.865759	29.16	20:00:00
18/07/2016	20:41:45	18/07/2016 20:41	51.7187	-5.340334	bird 57	335.1821	312	226.883044	0.727189244	4505.986089	29.16	20:00:00
18/07/2016	20:46:57	18/07/2016 20:46	51.72055	-5.341715	bird 57	297.4669	313	135.3645994	0.432474759	4502.018682	26.36	20:00:00
18/07/2016	20:52:10	18/07/2016 20:52	51.72111	-5.343454	bird 57	284.3275	313	129.1673942	0.412675381	4586.6503	26.36	20:00:00
18/07/2016	20:57:23	18/07/2016 20:57	51.72139	-5.345268	bird 57	277.7813	314	128.5957711	0.409540672	4690.073143	34.67	20:00:00
18/07/2016	21:02:37	18/07/2016 21:02	51.72155	-5.347111	bird 57	269.7979	306	126.0444336	0.411909914	4801.424117	34.67	21:00:00
18/07/2016	21:07:43	18/07/2016 21:07	51.72155	-5.348935	bird 57	267.7836	305	141.2877	0.463238361	4918.662426	38.04	21:00:00
18/07/2016	21:17:59	18/07/2016 21:17	51.7314	-5.347684	bird 57	222.3295	309	167.0437614	0.540594697	4558.4879	44.23	21:00:00
18/07/2016	21:23:08	18/07/2016 21:23	51.73029	-5.349312	bird 57	217.7704	311	176.1650954	0.566447252	4688.316631	44.23	21:00:00
18/07/2016	21:28:19	18/07/2016 21:28	51.72904	-5.350877	bird 57	205.6112	312	204.9868443	0.657009116	4819.090777	35.18	21:00:00
18/07/2016	21:33:31	18/07/2016 21:33	51.72738	-5.352164	bird 57	204.8975	313	214.7779862	0.686191649	4943.897104	35.18	21:00:00
18/07/2016	21:54:25	18/07/2016 21:54	51.74949	-5.335206	bird 57	209.1091	336	398.7754979	1.186831839	3897.319383	56.13	21:00:00
18/07/2016	22:00:01	18/07/2016 22:00	51.74636	-5.338019	bird 57	208.6779	362	479.6854197	1.325097844	3976.903991	65.81	22:00:00
18/07/2016	22:06:03	18/07/2016 22:06	51.74258	-5.341359	bird 57	203.8147	305	436.7674408	1.432024396	4118.702612	75.33	22:00:00
18/07/2016	22:11:08	18/07/2016 22:11	51.73899	-5.343917	bird 57	197.1012	307	435.4862486	1.418521982	4256.514626	75.33	22:00:00
18/07/2016	22:16:15	18/07/2016 22:16	51.73525	-5.345776	bird 57	196.4206	306	432.6873377	1.414010907	4385.922363	84.5	22:00:00
18/07/2016	22:21:21	18/07/2016 22:21	51.73152	-5.347548	bird 57	188.7544	307	446.9650132	1.455912095	4547.324368	84.5	22:00:00
18/07/2016	22:26:28	18/07/2016 22:26	51.72755	-5.348537	bird 57	182.659	306	404.3186098	1.321302647	4696.287867	92.1	22:00:00
18/07/2016	22:31:34	18/07/2016 22:31	51.72392	-5.348809	bird 57	87.16126	305	541.1556018	1.774280661	4823.053962	92.1	22:00:00
18/07/2016	22:36:39	18/07/2016 22:36	51.72416	-5.340987	bird 57	114.8101	308	340.3176696	1.104927499	4304.487864	89.9	22:00:00
18/07/2016	22:41:47	18/07/2016 22:41	51.72288	-5.336514	bird 57	174.3085	326	636.2308652	1.951628421	4069.714357	89.9	22:00:00
18/07/2016	22:58:18	18/07/2016 22:58	51.71802	-5.299059	bird 57	38.87945	432	579.3375169	1.341059067	2434.134884	83.9	22:00:00
18/07/2016	23:05:30	18/07/2016 23:05	51.72207	-5.29379	bird 57	75.55793	485	1187.978992	2.449441222	1867.962282	82.9	23:00:00
10/08/2016	01:42:24	10/08/2016 01:42	51.7434	-5.275837	bird 58	358.2211	314	207.0478942	0.659388198	811.0791041	327.3	1:00:00
10/08/2016	01:47:38	10/08/2016 01:47	51.74526	-5.27593	bird 58	12.83267	306	397.203483	1.298050598	988.9631354	320.6	1:00:00
10/08/2016	01:52:44	10/08/2016 01:52	51.74874	-5.274647	bird 58	340.6776	315	277.1536342	0.879852807	1378.735927	320.6	1:00:00
10/08/2016	01:57:59	10/08/2016 01:57	51.75109	-5.275978	bird 58	259.3097	331	96.20239283	0.29064167	1597.042257	321.1	1:00:00
10/08/2016	02:03:30	10/08/2016 02:03	51.75093	-5.277347	bird 58	254.2677	353	83.40748221	0.236281819	1557.13618	321.1	2:00:00
10/08/2016	02:09:23	10/08/2016 02:09	51.75073	-5.278511	bird 58	251.8861	314	80.53455916	0.256479488	1520.115179	320.1	2:00:00
10/08/2016	02:14:37	10/08/2016 02:14	51.75051	-5.279622	bird 58	266.1602	314	106.6359775	0.339605024	1485.046013	320.1	2:00:00
10/08/2016	02:19:51	10/08/2016 02:19	51.75044	-5.281162	bird 58	275.6213	314	91.11055966	0.290161018	1468.527739	318.8	2:00:00
10/08/2016	02:25:05	10/08/2016 02:25	51.75052	-5.282475	bird 58	280.1968	315	98.37580715	0.31230415	1475.951388	320	2:00:00
10/08/2016	02:30:20	10/08/2016 02:30	51.75068	-5.283876	bird 58	275.3736	347	122.6706663	0.35351777	1498.224804	320	2:00:00
10/08/2016	02:36:07	10/08/2016 02:36	51.75078	-5.285645	bird 58	290.807	405	166.3884769	0.410835745	1523.659758	320.9	2:00:00
10/08/2016	02:42:52	10/08/2016 02:42	51.75131	-5.287898	bird 58	278.9797	309	166.6488544	0.539316681	1612.683682	320.9	2:00:00
10/08/2016	02:48:01	10/08/2016 02:48	51.75155	-5.29028	bird 58	279.7485	311	173.211629	0.556950576	1685.605446	318.8	2:00:00
10/08/2016	02:53:12	10/08/2016 02:53	51.75181	-5.292753	bird 58	272.7004	311	198.9455786	0.639696394	1775.74972	318.8	2:00:00
10/08/2016	02:58:23	10/08/2016 02:58	51.75189	-5.295631	bird 58	268.0865	317	267.0541036	0.842441967	1873.581368	318.7	2:00:00
10/08/2016	03:03:40	10/08/2016 03:03	51.75181	-5.299496	bird 58	259.1489	308	271.3631869	0.881049308	2011.373506	318.7	3:00:00
10/08/2016	03:08:48	10/08/2016 03:08	51.75135	-5.303355	bird 58	278.9176	341	313.1589374	0.918354655	2141.781608	320.6	3:00:00
10/08/2016	03:14:29	10/08/2016 03:14	51.75179	-5.307834	bird 58	240.9179	326	375.4237573	1.151606618	2395.388342	320.6	3:00:00
10/08/2016	03:19:55	10/08/2016 03:19	51.75015	-5.312585	bird 58	233.2434	308	391.799042	1.272074812	2538.634199	319.8	3:00:00
10/08/2016	03:25:03	10/08/2016 03:25	51.74805	-5.317139	bird 58	227.9178	328	485.6180812	1.48054293	2690.930616	321.4	3:00:00
10/08/2016	03:30:31	10/08/2016 03:30	51.74513	-5.322365	bird 58	215.5657	308	472.0575711	1.532654452	2903.335664	321.4	3:00:00
10/08/2016	03:35:39	10/08/2016 03:35	51.74168	-5.326343	bird 58	208.668	307	466.9516047	1.521014999	3081.564164	323.6	3:00:00
10/08/2016	03:40:46	10/08/2016 03:40	51.738	-5.329593	bird 58	208.9605	306	451.7592672	1.476337475	3266.885705	323.6	3:00:00
10/08/2016	03:45:52	10/08/2016 03:45	51.73445	-5.332767	bird 58	193.7065	309	478.7770486	1.549440287	3498.370642	322.7	3:00:00
10/08/2016	03:51:01	10/08/2016 03:51	51.73027	-5.334413	bird 58	276.6056	306	595.6313863	1.946507798	3680.73208	322.7	3:00:00
10/08/2016	03:56:07	10/08/2016 03:56	51.73088	-5.342978	bird 58	271.6951	313	589.4595456	1.883257334	4247.259996	316.2	3:00:00
10/08/2016	04:01:20	10/08/2016 04:01	51.73104	-5.351506	bird 58	196.3658	312	307.3303572	0.985033196	4824.723949	316.2	4:00:00
10/08/2016	04:06:32	10/08/2016 04:06	51.72839	-5.352761	bird 58	254.8345	312	421.2046371	1.350014863	4960.425378	316.1	4:00:00
10/08/2016	20:11:12	10/08/2016 20:11	51.70858	-5.314006	bird 58	136.065	308	269.3894583	0.874641098	3869.33779	275.6	20:00:00
10/08/2016	20:16:20	10/08/2016 20:16	51.70684	-5.311296	bird 58	136.2922	310	246.7137506	0.795850808	3931.782224	272.1	20:00:00
10/08/2016	20:26:39	10/08/2016 20:26	51.7123	-5.306795	bird 58	89.99923	309	135.8157061	0.43953303	3251.680011	279	20:00:00
10/08/2016	20:31:48	10/08/2016 20:31	51.7123	-5.30483	bird 58	70.64169	312	130.9127946	0.41959229	3183.16271	279	20:00:00
10/08/2016	20:37:00	10/08/2016 20:37	51.71269	-5.303043	bird 58	52.38906	313	127.2512249	0.406553434	3086.201033	279.8	20:00:00
10/08/2016	20:42:13	10/08/2016 20:42	51.71339	-5.301587	bird 58	28.341	312	112.746777	0.361367875	2971.060591	279.8	20:00:00
10/08/2016	20:47:25	10/08/2016 20:47	51.71428	-5.300807	bird 58	351.8513	311	127.0036437	0.408371845	2858.502705	289.4	20:00:00
10/08/2016	20:52:36	10/08/2016 20:52	51.71541	-5.301067	bird 58	343.7192	311	100.8990059	0.324434103	2755.230109	289.4	20:00:00
10/08/2016	20:57:47	10/08/2016 20:57	51.71628	-5.301479	bird 58	320.4011	311	150.3914795	0.483573889	2684.304737	280.9	20:00:00
10/08/2016	21:02:58	10/08/2016 21:02	51.71732	-5.302869	bird 58	301.2524	302	145.9520873	0.483285057	2635.04138	280.9	21:00:00
10/08/2016	21:08:00	10/08/2016 21:08	51.718	-5.304675	bird 58	287.8256	303	182.1643452	0.601202459	2642.771866	274.3	21:00:00
10/08/2016	21:13:03	10/08/2016 21:13	51.7185	-5.307185	bird 58	288.9923	304	209.0410036	0.68763488	2704.667257	274.3	21:00:00
10/08/2016	21:18:07	10/08/2016 21:18	51.71911	-5.310046	bird 58	278.6613	306	211.9333125	0.692592525	2784.763392	275.6	21:00:00
10/08/2016	21:23:13	10/08/2016 21:23	51.7194	-5.313077	bird 58	273.1198	305	180.4387588	0.591602488	2910.522375	275.6	21:00:00
10/08/2016	21:28:18	10/08/2016 21:28	51.71949	-5.315684	bird 58	285.6847	304	192.0794158	0.631840184	3037.807277	281	21:00:00
10/08/2016	21:43:22	10/08/2016 21:43	51.7424	-5.276241	bird 58	214.8029	322	719.740293	2.235218301	703.2881114	279	21:00:00
25/07/2016	03:11:48	25/07/2016 03:11	51.74583	-5.274126	bird 59	345.0343	313	299.4993531	0.956866943	1103.213148	283.5	3:00:00
25/07/2016	03:17:01	25/07/2016 03:17	51.74843	-5.275249	bird 59	340.0906	463	1120.959434	2.421078691	1331.469804	288.5	3:00:00
25/07/2016	03:24:44	25/07/2016 03:24	51.7579	-5.280789	bird 59	346.3582	302	688.1902569	2.278775685	2298.370179	288.5	3:00:00
25/07/2016	03:29:46	25/07/2016 03:29	51.76391	-5.283145	bird 59	231.7376	317	215.276011	0.679104135	2965.464358	290.4	3:00:00
25/07/2016	22:28:29	25/07/2016 22:28	51.74166	-5.277853	bird 59	217.9012	309	559.0674879	1.809279896	573.4714766	253.1	22:00:00
26/07/2016	00:55:11	26/07/2016 00:55	51.74464	-5.279361	bird 59	313.5594	311	135.7261419	0.436418463	844.3472532	268.8	0:00:00
26/07/2016	01:00:22	26/07/2016 01:00	51.74548	-5.280786	bird 59	303.0856	314	87.5147644	0.278709441	920.2891073	268.8	1:00:00
26/07/2016	01:05:36	26/07/2016 01:05	51.74591	-5.281847	bird 59	310.7099	758	215.4610898	0.284249459	963.438323	271.2	1:00:00
26/07/2016	01:18:14	26/07/2016 01:18	51.74717	-5.284216	bird 59	316.8027	570	261.2345099	0.458306158	1112.291565	271.2	1:00:00
26/07/2016	01:27:44	26/07/2016 01:27	51.74888	-5.286808	bird 59	284.1117	620	270.7861675	0.436751883	1332.349283	274.4	1:00:00
26/07/2016	01:38:04	26/07/2016 01:38	51.74947	-5.290612	bird 59	309.1445	694	528.9589833	0.762188737	1478.241334	278.1	1:00:00
26/07/2016	01:49:38	26/07/2016 01:49	51.75247	-5.296554	bird 59	261.9602	303	212.9585963	0.702833651	1961.205195	283.9	1:00:00
26/07/2016	01:54:41	26/07/2016 01:54	51.7522	-5.299607	bird 59	257.5415	304	256.2668453	0.842983044	2050.908798	283.9	1:00:00
26/07/2016	01:59:45	26/07/2016 01:59	51.75171	-5.303233	bird 59	252.5848	306	352.5975906	1.152279708	2165.621985	281.3	1:00:00
26/07/2016	02:04:51	26/07/2016 02:04	51.75076	-5.308104	bird 59	247.3545	303	407.5714915	1.345120434	2333.822567	281.3	2:00:00
26/07/2016	02:09:54	26/07/2016 02:09	51.74935	-5.313551	bird 59	281.4177	302	494.3204616	1.63682272	2545.668893	274.3	2:00:00
26/07/2016	02:14:56	26/07/2016 02:14	51.75023	-5.320567	bird 59	228.9696	302	368.0301282	1.218642809	3012.347429	274.3	2:00:00
26/07/2016	02:19:58	26/07/2016 02:19	51.74806	-5.324589	bird 59	229.6048	302	380.5836034	1.260210607	3158.669759	267.9	2:00:00
26/07/2016	02:25:00	26/07/2016 02:25	51.74585	-5.328795	bird 59	228.2742	301	421.6726797	1.400905913	3350.04344	267.9	2:00:00
04/06/2016	01:53:04	04/06/2016 01:53	51.74951	-5.279899	bird 60	319.3021	947	1974.946218	2.085476471	1372.390578	69.17	1:00:00
15/06/2016	22:55:32	15/06/2016 22:55	51.69825	-5.310068	bird 60	15.76624	920	444.0075163	0.482616866	4743.293986	357.3	22:00:00
15/06/2016	23:10:52	15/06/2016 23:10	51.70209	-5.30832	bird 60	16.64095	909	407.6494418	0.448459232	4304.566809	359.9	23:00:00
15/06/2016	23:41:04	15/06/2016 23:41	51.7529	-5.310064	bird 60	80.35877	903	1207.610587	1.337331768	2591.991955	351.3	23:00:00
15/06/2016	23:56:07	15/06/2016 23:56	51.75471	-5.292821	bird 60	70.53023	919	139.3383858	0.151619571	2075.663827	357.7	23:00:00
16/06/2016	00:11:26	16/06/2016 00:11	51.75513	-5.29092	bird 60	85.27762	920	159.9303402	0.173837326	2077.745788	353.5	0:00:00
16/06/2016	00:26:46	16/06/2016 00:26	51.75525	-5.288612	bird 60	95.37684	925	549.6274198	0.594191805	2050.360442	355	0:00:00
16/06/2016	00:42:11	16/06/2016 00:42	51.75479	-5.280687	bird 60	82.86096	951	243.269236	0.255803613	1953.253521	359.4	0:00:00
16/06/2016	00:58:02	16/06/2016 00:58	51.75506	-5.277191	bird 60	94.28816	1111	414.520168	0.373105462	2010.012316	356.2	0:00:00
25/07/2016	02:44:04	25/07/2016 02:44	51.74786	-5.274743	bird 61	328.8829	284	287.2438259	1.011421922	1285.927797	281.1	2:00:00
25/07/2016	02:48:48	25/07/2016 02:48	51.75007	-5.276893	bird 61	299.4371	292	283.7251517	0.971661478	1471.245332	285.2	2:00:00
25/07/2016	02:53:40	25/07/2016 02:53	51.75132	-5.280474	bird 61	292.1622	415	508.4901916	1.22527757	1569.080676	285.2	2:00:00
25/07/2016	03:04:51	25/07/2016 03:04	51.76458	-5.298481	bird 61	204.4962	257	283.7026367	1.10390131	3240.089257	285.4	3:00:00
25/07/2016	03:13:25	25/07/2016 03:13	51.76428	-5.310921	bird 61	198.0185	258	279.6781665	1.084023901	3599.098459	283.5	3:00:00
25/07/2016	03:17:43	25/07/2016 03:17	51.76189	-5.312176	bird 61	205.041	260	282.671375	1.087197596	3431.649249	288.5	3:00:00
25/07/2016	03:22:03	25/07/2016 03:22	51.75959	-5.313915	bird 61	246.3061	257	260.3470536	1.013023555	3308.972941	288.5	3:00:00
25/07/2016	18:12:23	25/07/2016 18:12	51.75911	-5.331268	bird 61	123.8009	310	125.1175065	0.40360486	4163.704446	257.4	18:00:00
25/07/2016	18:17:33	25/07/2016 18:17	51.75848	-5.329767	bird 61	122.7435	309	117.7578267	0.38109329	4038.931909	257.2	18:00:00
25/07/2016	18:22:42	25/07/2016 18:22	51.75791	-5.32833	bird 61	104.7846	312	108.4430097	0.347573749	3921.637953	257.2	18:00:00
25/07/2016	18:27:54	25/07/2016 18:27	51.75766	-5.326812	bird 61	97.2679	310	87.29852817	0.281608155	3820.862525	255.1	18:00:00
25/07/2016	18:33:04	25/07/2016 18:33	51.75756	-5.325558	bird 61	92.43226	312	110.3601189	0.35371833	3745.051648	255.1	18:00:00
25/07/2016	18:38:16	25/07/2016 18:38	51.75752	-5.323961	bird 61	74.91073	311	109.3997705	0.351767751	3655.209829	254.9	18:00:00
25/07/2016	18:43:27	25/07/2016 18:43	51.75778	-5.322433	bird 61	71.90509	311	116.2034519	0.37364454	3591.293659	254.9	18:00:00
25/07/2016	18:48:38	25/07/2016 18:48	51.7581	-5.320831	bird 61	74.68564	310	143.5819605	0.463167614	3530.122996	252.2	18:00:00
25/07/2016	18:53:48	25/07/2016 18:53	51.75844	-5.318825	bird 61	49.64047	312	114.9882404	0.368552053	3452.872369	252.2	18:00:00
25/07/2016	18:59:00	25/07/2016 18:59	51.75911	-5.317557	bird 61	60.72642	303	139.2491392	0.459568116	3441.788555	246.5	18:00:00
25/07/2016	19:04:03	25/07/2016 19:04	51.75972	-5.315796	bird 61	51.74511	297	161.5451237	0.543922975	3406.487625	246.5	19:00:00
25/07/2016	19:09:00	25/07/2016 19:09	51.76062	-5.31396	bird 61	55.45385	296	150.3172961	0.507828703	3397.782751	249.4	19:00:00
25/07/2016	19:13:56	25/07/2016 19:13	51.76138	-5.31216	bird 61	53.72372	295	155.6077068	0.527483752	3385.87562	249.4	19:00:00
25/07/2016	19:18:51	25/07/2016 19:18	51.76221	-5.310346	bird 61	54.46221	295	174.751041	0.59237641	3386.412936	255.1	19:00:00
25/07/2016	19:23:46	25/07/2016 19:23	51.76312	-5.308283	bird 61	52.12971	295	188.9167032	0.640395604	3392.468121	255.1	19:00:00
25/07/2016	19:28:41	25/07/2016 19:28	51.76416	-5.30612	bird 61	33.09839	295	151.7247385	0.514321147	3416.763191	254.6	19:00:00
25/07/2016	19:33:36	25/07/2016 19:33	51.7653	-5.304914	bird 61	49.25914	295	206.4940738	0.699979911	3490.27783	254.6	19:00:00
25/07/2016	19:38:31	25/07/2016 19:38	51.76651	-5.302646	bird 61	42.95362	296	189.7575462	0.641072791	3546.104333	253.6	19:00:00
25/07/2016	19:43:27	25/07/2016 19:43	51.76776	-5.300776	bird 61	46.77002	296	215.0709753	0.726591133	3626.603716	253.6	19:00:00
25/07/2016	19:48:23	25/07/2016 19:48	51.76908	-5.2985	bird 61	39.86555	296	191.3111819	0.646321561	3713.874004	250.8	19:00:00
25/07/2016	19:53:19	25/07/2016 19:53	51.7704	-5.296724	bird 61	37.95916	312	209.4878457	0.671435403	3820.138773	250.8	19:00:00
25/07/2016	19:58:31	25/07/2016 19:58	51.77188	-5.294848	bird 61	37.80767	332	223.9741214	0.674620848	3948.63167	249.7	19:00:00
25/07/2016	20:04:03	25/07/2016 20:04	51.77347	-5.292858	bird 61	38.25261	303	201.12037	0.663763597	4094.413338	249.7	20:00:00
25/07/2016	20:09:06	25/07/2016 20:09	51.77489	-5.291055	bird 61	35.15165	286	194.9436393	0.681621116	4230.105375	253.2	20:00:00
25/07/2016	20:13:52	25/07/2016 20:13	51.77632	-5.289423	bird 61	32.30192	286	198.9535207	0.695641681	4373.250345	253.2	20:00:00
25/07/2016	20:18:38	25/07/2016 20:18	51.77783	-5.287879	bird 61	26.41415	285	183.8605783	0.645124836	4529.634372	261.7	20:00:00
25/07/2016	20:23:23	25/07/2016 20:23	51.77931	-5.286694	bird 61	29.56374	283	201.1450764	0.710759987	4687.473783	261.7	20:00:00
25/07/2016	20:28:06	25/07/2016 20:28	51.78088	-5.285249	bird 61	26.50548	286	191.4951743	0.669563547	4856.315173	255	20:00:00
25/07/2016	20:51:50	25/07/2016 20:51	51.7629	-5.276602	bird 61	65.8296	285	271.4279117	0.952378637	2877.987135	251.4	20:00:00
25/07/2016	20:56:35	25/07/2016 20:56	51.7639	-5.273016	bird 61	65.75561	295	226.5175556	0.767856121	3029.774854	262	20:00:00
25/07/2016	21:01:30	25/07/2016 21:01	51.76473	-5.27002	bird 61	66.56435	309	217.51082	0.703918511	3168.186281	262	21:00:00
25/07/2016	21:06:39	25/07/2016 21:06	51.76551	-5.267131	bird 61	63.51308	310	218.9025351	0.70613721	3308.638971	264	21:00:00
25/07/2016	21:11:49	25/07/2016 21:11	51.76638	-5.264287	bird 61	72.88703	311	196.7491959	0.63263407	3465.257479	264	21:00:00
25/07/2016	21:17:00	25/07/2016 21:17	51.7669	-5.261563	bird 61	72.42476	308	163.1876249	0.529829951	3589.239863	259.7	21:00:00
25/07/2016	21:22:08	25/07/2016 21:22	51.76734	-5.259308	bird 61	77.9544	308	142.7813484	0.463575807	3697.570811	259.7	21:00:00
25/07/2016	21:27:16	25/07/2016 21:27	51.76761	-5.257286	bird 61	88.53779	309	118.0936947	0.382180242	3785.658074	255.3	21:00:00
25/07/2016	21:32:25	25/07/2016 21:32	51.76764	-5.255576	bird 61	85.7431	310	109.6941032	0.353851946	3843.277156	255.3	21:00:00
25/07/2016	21:37:35	25/07/2016 21:37	51.76771	-5.253991	bird 61	103.2581	309	109.2943753	0.35370348	3903.170922	246.6	21:00:00
25/07/2016	21:42:44	25/07/2016 21:42	51.76749	-5.252448	bird 61	158.0843	309	325.1082267	1.052130184	3936.103372	246.6	21:00:00
25/07/2016	21:47:53	25/07/2016 21:47	51.76478	-5.250687	bird 61	104.0283	308	117.4609443	0.381366702	3750.729926	245.9	21:00:00
26/07/2016	02:24:59	26/07/2016 02:24	51.72348	-5.286998	bird 61	201.6747	291	389.2488571	1.337624939	1566.673332	267.9	2:00:00
26/07/2016	02:29:50	26/07/2016 02:29	51.72023	-5.289083	bird 61	158.3235	290	161.5595136	0.557101771	1951.352029	273.3	2:00:00
26/07/2016	02:34:40	26/07/2016 02:34	51.71888	-5.288222	bird 61	160.3215	291	229.3299577	0.788075456	2084.572738	273.3	2:00:00
26/07/2016	02:49:12	26/07/2016 02:49	51.7073	-5.330467	bird 61	132.4637	293	161.7316044	0.551984998	4707.333599	270.7	2:00:00
26/07/2016	20:02:57	26/07/2016 20:02	51.76323	-5.298604	bird 61	112.759	285	417.6646271	1.46548992	3102.804345	215.9	20:00:00
26/07/2016	20:07:42	26/07/2016 20:07	51.76178	-5.293024	bird 61	65.78404	284	123.692328	0.435536366	2828.419437	218.1	20:00:00
26/07/2016	20:12:26	26/07/2016 20:12	51.76224	-5.291393	bird 61	62.21447	287	140.0297589	0.487908568	2850.679185	218.1	20:00:00
26/07/2016	20:17:13	26/07/2016 20:17	51.76282	-5.289593	bird 61	64.72403	285	140.5877106	0.493290213	2889.101596	221.7	20:00:00
26/07/2016	20:21:58	26/07/2016 20:21	51.76336	-5.287752	bird 61	65.92626	286	151.4852846	0.529668827	2928.898667	221.7	20:00:00
26/07/2016	20:26:44	26/07/2016 20:26	51.76392	-5.285752	bird 61	63.47326	285	149.5876742	0.524869032	2976.068647	222.3	20:00:00
26/07/2016	20:31:29	26/07/2016 20:31	51.76452	-5.283813	bird 61	64.69592	287	144.1179011	0.502152965	3034.64665	222.3	20:00:00
26/07/2016	20:36:16	26/07/2016 20:36	51.76507	-5.281923	bird 61	62.87186	286	133.2010253	0.465737851	3093.728653	221.7	20:00:00
26/07/2016	20:41:02	26/07/2016 20:41	51.76561	-5.280201	bird 61	62.46124	285	139.1033823	0.488082043	3156.626688	221.7	20:00:00
26/07/2016	20:45:47	26/07/2016 20:45	51.76619	-5.278416	bird 61	53.06878	285	135.164664	0.474261979	3228.555117	221	20:00:00
26/07/2016	20:50:32	26/07/2016 20:50	51.76692	-5.276851	bird 61	62.0058	285	125.3314763	0.439759566	3319.613272	221	20:00:00
26/07/2016	21:00:04	26/07/2016 21:00	51.75901	-5.266577	bird 61	198.0311	291	456.5145133	1.568778396	2647.129126	217.4	21:00:00
26/07/2016	21:04:55	26/07/2016 21:04	51.75511	-5.268631	bird 61	57.97062	293	109.5974367	0.374052685	2193.889282	217.4	21:00:00
26/07/2016	21:09:48	26/07/2016 21:09	51.75563	-5.267283	bird 61	56.92607	292	89.72831699	0.307288757	2286.422886	219.5	21:00:00
26/07/2016	21:14:40	26/07/2016 21:14	51.75607	-5.266194	bird 61	154.45	293	154.1577384	0.526135626	2364.18563	219.5	21:00:00
26/07/2016	21:19:33	26/07/2016 21:19	51.75482	-5.265231	bird 61	72.73579	293	81.64673247	0.27865779	2275.327351	222.8	21:00:00
26/07/2016	21:24:26	26/07/2016 21:24	51.75504	-5.264103	bird 61	197.0409	293	72.14650619	0.24623381	2336.752711	222.8	21:00:00
26/07/2016	21:29:19	26/07/2016 21:29	51.75442	-5.264409	bird 61	183.5465	294	399.0910219	1.357452455	2267.256294	234.3	21:00:00
26/07/2016	21:34:13	26/07/2016 21:34	51.75084	-5.264768	bird 61	67.45417	293	93.31340215	0.318475775	1928.467646	234.3	21:00:00
26/07/2016	21:39:06	26/07/2016 21:39	51.75116	-5.263519	bird 61	200.132	292	348.4613804	1.193360892	2010.272886	236	21:00:00
26/07/2016	21:43:58	26/07/2016 21:43	51.74822	-5.265258	bird 61	118.2366	293	30.63334673	0.104550671	1686.308698	236	21:00:00
26/07/2016	21:48:51	26/07/2016 21:48	51.74809	-5.264867	bird 61	229.6231	292	695.9916552	2.383533066	1694.691448	236.4	21:00:00
26/07/2016	21:53:43	26/07/2016 21:53	51.74404	-5.272547	bird 61	227.6682	292	278.4986676	0.95376256	1004.494824	236.4	21:00:00
26/07/2016	21:58:35	26/07/2016 21:58	51.74236	-5.275536	bird 61	79.49994	328	128.5420764	0.391896574	729.0395607	235.8	21:00:00
26/07/2016	22:04:03	26/07/2016 22:04	51.74257	-5.273706	bird 61	333.2934	285	39.87668917	0.139918208	830.3635828	235.8	22:00:00
26/07/2016	22:08:48	26/07/2016 22:08	51.74289	-5.273966	bird 61	357.559	285	234.9773627	0.824481974	844.0069186	232	22:00:00
26/07/2016	22:18:17	26/07/2016 22:18	51.73848	-5.279253	bird 61	236.7133	318	242.6693453	0.763111149	242.8784201	235.9	22:00:00
27/07/2016	20:22:55	27/07/2016 20:22	51.73365	-5.283494	bird 62	17.04505	305	307.2967615	1.007530366	410.3890303	229.3	20:00:00
27/07/2016	23:17:11	27/07/2016 23:17	51.7323	-5.265622	bird 62	293.7793	681	1316.899184	1.933772663	1265.126579	222.6	23:00:00
28/07/2016	00:04:09	28/07/2016 00:04	51.74289	-5.277288	bird 62	74.00227	306	566.6518618	1.85180347	711.611627	214.3	0:00:00
24/07/2016	23:48:57	24/07/2016 23:48	51.75671	-5.306119	bird 63	274.5924	309	313.6329339	1.014993313	2720.80163	280.7	23:00:00
24/07/2016	23:54:06	24/07/2016 23:54	51.75694	-5.310646	bird 63	279.227	309	299.8545143	0.970402959	2939.238666	280.7	23:00:00
24/07/2016	23:59:15	24/07/2016 23:59	51.75737	-5.314933	bird 63	284.1188	309	271.944354	0.880078816	3177.298833	281.4	23:00:00
25/07/2016	00:04:24	25/07/2016 00:04	51.75796	-5.318755	bird 63	313.6581	305	343.3375039	1.125696734	3413.121332	281.4	0:00:00
25/07/2016	00:09:29	25/07/2016 00:09	51.76009	-5.322353	bird 63	281.1045	304	231.6775556	0.762097222	3755.706577	283.6	0:00:00
25/07/2016	22:23:20	25/07/2016 22:23	51.74992	-5.297542	bird 63	121.0114	300	322.0532464	1.073510821	1762.470976	255.2	22:00:00
25/07/2016	22:28:20	25/07/2016 22:28	51.74843	-5.293544	bird 63	277.6838	300	331.3235147	1.104411716	1469.626691	253.1	22:00:00
26/07/2016	02:00:11	26/07/2016 02:00	51.7509	-5.28089	bird 63	330.7682	322	660.8667636	2.052381253	1520.589097	281.3	2:00:00
26/07/2016	02:05:33	26/07/2016 02:05	51.75608	-5.285573	bird 63	267.1109	801	512.9268934	0.640358169	2107.141243	274.3	2:00:00
26/07/2016	02:18:54	26/07/2016 02:18	51.75585	-5.292992	bird 63	264.3025	301	244.9079113	0.813647546	2198.66229	267.9	2:00:00
26/07/2016	02:23:55	26/07/2016 02:23	51.75563	-5.296521	bird 63	255.4486	301	280.882063	0.933163	2270.401649	267.9	2:00:00
26/07/2016	02:28:56	26/07/2016 02:28	51.755	-5.30046	bird 63	252.4323	301	329.8215638	1.095752704	2341.547814	273.3	2:00:00
26/07/2016	02:33:57	26/07/2016 02:33	51.75411	-5.305016	bird 63	250.3706	301	376.3376884	1.250291324	2447.549074	273.3	2:00:00
26/07/2016	02:38:58	26/07/2016 02:38	51.75297	-5.310147	bird 63	245.9127	299	404.9930831	1.354491917	2601.452563	269.2	2:00:00
26/07/2016	02:43:57	26/07/2016 02:43	51.75149	-5.315505	bird 63	236.9437	300	437.2821007	1.457607002	2788.686077	269.2	2:00:00
26/07/2016	02:48:57	26/07/2016 02:48	51.74935	-5.320816	bird 63	227.7995	299	474.8309119	1.588063251	2982.01097	270.7	2:00:00
26/07/2016	02:53:56	26/07/2016 02:53	51.74649	-5.325919	bird 63	220.7737	299	504.4803204	1.687225152	3183.009842	270.7	2:00:00
26/07/2016	02:58:55	26/07/2016 02:58	51.74306	-5.330696	bird 63	214.0802	312	516.123261	1.654241221	3403.503189	266.1	2:00:00
26/07/2016	03:04:07	26/07/2016 03:04	51.73922	-5.334888	bird 63	209.9437	312	533.2355512	1.709088305	3636.991397	266.1	3:00:00
26/07/2016	03:09:19	26/07/2016 03:09	51.73507	-5.338749	bird 63	205.103	311	522.313823	1.679465669	3903.931951	264.7	3:00:00
26/07/2016	03:14:30	26/07/2016 03:14	51.73082	-5.34196	bird 63	200.5905	311	511.236112	1.643846019	4179.291979	264.7	3:00:00
26/07/2016	03:19:41	26/07/2016 03:19	51.72652	-5.344568	bird 63	198.8758	311	506.9780222	1.630154412	4460.008284	264.5	3:00:00
26/07/2016	03:24:52	26/07/2016 03:24	51.72221	-5.346949	bird 63	196.7584	311	528.8175131	1.700377856	4764.754007	264.5	3:00:00
26/07/2016	22:05:39	26/07/2016 22:05	51.74972	-5.292027	bird 63	10.02463	335	184.1911913	0.549824452	1544.127901	232	22:00:00
26/07/2016	22:11:14	26/07/2016 22:11	51.75135	-5.291561	bird 63	45.72163	334	153.0346541	0.458187587	1696.275743	232	22:00:00
26/07/2016	22:16:48	26/07/2016 22:16	51.75231	-5.289974	bird 63	68.0495	333	144.2214488	0.433097444	1759.004712	235.9	22:00:00
26/07/2016	22:22:21	26/07/2016 22:22	51.75279	-5.288034	bird 63	134.9842	366	162.8763623	0.445017383	1774.811869	235.9	22:00:00
26/07/2016	22:28:27	26/07/2016 22:28	51.75176	-5.286358	bird 63	213.7151	383	197.9969213	0.516963241	1639.292949	234.1	22:00:00
26/07/2016	22:34:50	26/07/2016 22:34	51.75028	-5.28795	bird 63	246.1603	380	264.1329082	0.695086601	1502.843402	234.1	22:00:00
26/07/2016	22:41:10	26/07/2016 22:41	51.74932	-5.291448	bird 63	282.2288	359	383.963203	1.069535384	1486.741743	233.2	22:00:00
26/07/2016	22:47:09	26/07/2016 22:47	51.75005	-5.296882	bird 63	159.4185	319	229.5088945	0.719463619	1747.311597	235.3	22:00:00
26/07/2016	22:58:04	26/07/2016 22:58	51.74176	-5.280498	bird 63	179.1629	373	504.0728544	1.351401754	514.6984737	234.4	22:00:00
17/07/2016	02:53:34	17/07/2016 02:53	51.73036	-5.341351	bird 64	345.9089	313	138.8185029	0.443509594	4147.138985	249.5	2:00:00
17/07/2016	02:58:47	17/07/2016 02:58	51.73157	-5.341841	bird 64	345.5138	316	172.4233408	0.545643484	4157.706256	242.4	2:00:00
17/07/2016	03:04:03	17/07/2016 03:04	51.73307	-5.342468	bird 64	311.7219	311	736.2395937	2.367329883	4178.504729	242.4	3:00:00
21/07/2016	23:27:02	21/07/2016 23:27	51.74127	-5.279321	bird 64	200.9918	371	498.3760405	1.343331646	488.2490036	160.7	23:00:00
22/07/2016	02:27:34	22/07/2016 02:27	51.75714	-5.284105	bird 64	258.5836	2234	61.98355262	0.027745547	2215.934732	155.7	2:00:00
22/07/2016	03:04:48	22/07/2016 03:04	51.75703	-5.284985	bird 64	158.3009	312	50.31203207	0.161256513	2208.224718	158.7	3:00:00
22/07/2016	03:10:00	22/07/2016 03:10	51.75661	-5.284715	bird 64	150.587	312	48.59717102	0.155760164	2160.1178	158	3:00:00
22/07/2016	03:25:32	22/07/2016 03:25	51.77888	-5.308202	bird 64	56.42353	311	104.1034232	0.334737695	4964.04047	159.9	3:00:00
23/07/2016	22:57:20	23/07/2016 22:57	51.74943	-5.28068	bird 64	183.5099	556	1375.575032	2.474055812	1358.450186	202.8	22:00:00
24/07/2016	02:29:57	24/07/2016 02:29	51.76751	-5.290528	bird 64	204.6398	306	216.9094638	0.708854457	3413.882624	204.6	2:00:00
24/07/2016	02:35:03	24/07/2016 02:35	51.76574	-5.291845	bird 64	245.4238	325	273.2174539	0.840669089	3237.495408	204.4	2:00:00
24/07/2016	02:40:28	24/07/2016 02:40	51.76472	-5.295445	bird 64	209.6724	414	334.2736438	0.80742426	3188.61402	204.4	2:00:00
24/07/2016	02:47:22	24/07/2016 02:47	51.76211	-5.297843	bird 64	206.7798	302	231.88137	0.767819106	2967.744767	203.7	2:00:00
24/07/2016	02:52:24	24/07/2016 02:52	51.76025	-5.299358	bird 64	216.2927	300	247.6575636	0.825525212	2818.296763	203.7	2:00:00
24/07/2016	02:57:24	24/07/2016 02:57	51.75846	-5.30149	bird 64	220.5519	309	279.8027471	0.905510508	2708.003036	206.6	2:00:00
24/07/2016	03:02:33	24/07/2016 03:02	51.75655	-5.304126	bird 64	221.4602	311	291.1217891	0.936082923	2625.333629	206.6	3:00:00
24/07/2016	03:07:44	24/07/2016 03:07	51.75459	-5.306919	bird 64	225.8364	310	335.9674069	1.083765829	2573.490234	211.7	3:00:00
24/07/2016	03:12:54	24/07/2016 03:12	51.75249	-5.310415	bird 64	220.8056	310	379.8384547	1.225285338	2579.778626	211.7	3:00:00
02/06/2016	00:17:03	02/06/2016 00:17	51.74155	-5.270778	bird 65	242.1315	921	945.6323483	1.026745221	918.5044378	358.7	0:00:00
09/06/2016	21:48:31	09/06/2016 21:48	51.725	-5.351482	bird 65	339.0749	963	1692.169072	1.757184913	4964.22223	153.9	21:00:00
05/08/2016	03:01:21	05/08/2016 03:01	51.74981	-5.273392	bird 66	10.16209	310	761.9286844	2.457834466	1521.861476	311.5	3:00:00
05/08/2016	03:06:31	05/08/2016 03:06	51.75655	-5.27144	bird 66	5.041911	312	97.18261816	0.311482751	2269.765231	313	3:00:00
05/08/2016	03:11:43	05/08/2016 03:11	51.75742	-5.271315	bird 66	3.990088	312	383.6755428	1.229729304	2364.15514	313	3:00:00
05/08/2016	03:16:55	05/08/2016 03:16	51.76086	-5.270928	bird 66	356.5201	315	82.4886029	0.261868581	2737.149319	309.7	3:00:00
05/08/2016	03:22:10	05/08/2016 03:22	51.7616	-5.271001	bird 66	358.1834	313	738.0462628	2.35797528	2814.796726	309.7	3:00:00
05/08/2016	03:27:23	05/08/2016 03:27	51.76823	-5.271341	bird 66	63.21866	363	61.46543754	0.169326274	3524.715868	304.1	3:00:00
05/08/2016	23:40:14	05/08/2016 23:40	51.75011	-5.281242	bird 66	264.4883	307	114.9717843	0.374500926	1431.619917	245.4	23:00:00
05/08/2016	23:45:21	05/08/2016 23:45	51.75001	-5.282899	bird 66	258.345	308	120.4000281	0.390909182	1419.986595	246.1	23:00:00
05/08/2016	23:50:29	05/08/2016 23:50	51.74979	-5.284606	bird 66	268.7868	308	142.1652324	0.46157543	1404.711724	246.1	23:00:00
05/08/2016	23:55:37	05/08/2016 23:55	51.74976	-5.286664	bird 66	268.7403	344	192.6606615	0.560060062	1425.348188	247.1	23:00:00
06/08/2016	00:01:21	06/08/2016 00:01	51.74972	-5.289453	bird 66	266.5704	308	197.5501685	0.641396651	1474.81641	247.1	0:00:00
06/08/2016	00:06:29	06/08/2016 00:06	51.74962	-5.292309	bird 66	276.4073	307	224.8844493	0.732522636	1542.840278	245.7	0:00:00
06/08/2016	00:11:36	06/08/2016 00:11	51.74984	-5.295546	bird 66	273.9566	306	289.5026298	0.946087025	1676.074254	245.7	0:00:00
06/08/2016	00:21:48	06/08/2016 00:21	51.73958	-5.278483	bird 66	159.6091	304	182.8702224	0.601546784	362.6890173	245.1	0:00:00
06/08/2016	02:17:29	06/08/2016 02:17	51.74393	-5.27464	bird 66	338.9312	318	100.298354	0.315403629	905.8534991	259	2:00:00
06/08/2016	02:22:47	06/08/2016 02:22	51.74477	-5.275167	bird 66	341.8937	407	131.1505058	0.322237115	965.3006664	259	2:00:00
06/08/2016	02:29:34	06/08/2016 02:29	51.74589	-5.275759	bird 66	354.0654	388	137.5833557	0.354596277	1057.366053	258.9	2:00:00
06/08/2016	02:36:02	06/08/2016 02:36	51.74712	-5.275964	bird 66	356.1808	295	289.9328893	0.982823354	1177.850995	257.3	2:00:00
06/08/2016	02:40:57	06/08/2016 02:40	51.74972	-5.276245	bird 66	300.0193	295	80.55315396	0.273061539	1445.504665	257.3	2:00:00
06/08/2016	02:45:52	06/08/2016 02:45	51.75008	-5.277257	bird 66	321.8621	295	139.8606213	0.474103801	1466.345162	260.5	2:00:00
06/08/2016	02:50:47	06/08/2016 02:50	51.75107	-5.278505	bird 66	319.7751	295	165.030379	0.559425013	1557.479204	260.5	2:00:00
08/08/2016	01:06:09	08/08/2016 01:06	51.74153	-5.282349	bird 66	175.5301	805	451.9930891	0.561482098	476.3228554	302.7	1:00:00
08/08/2016	06:29:26	08/08/2016 06:29	51.74557	-5.282455	bird 66	187.824	2745	518.8850888	0.189029176	925.5973721	289.7	6:00:00
21/07/2016	02:42:36	21/07/2016 02:42	51.74409	-5.276701	bird 67	353.4297	301	123.2050376	0.409319062	848.7642432	246.4	2:00:00
21/07/2016	02:47:37	21/07/2016 02:47	51.74519	-5.276906	bird 67	321.963	300	94.41898319	0.314729944	954.491006	247	2:00:00
21/07/2016	02:52:37	21/07/2016 02:52	51.74586	-5.277745	bird 67	346.6103	301	199.0341055	0.661242876	1004.832056	247	2:00:00
21/07/2016	02:57:38	21/07/2016 02:57	51.7476	-5.278414	bird 67	326.0995	311	644.2253801	2.071464245	1179.730618	242.9	2:00:00
21/07/2016	03:02:49	21/07/2016 03:02	51.7524	-5.283631	bird 67	330.5144	307	501.3038859	1.63291168	1687.862699	242.9	3:00:00
21/07/2016	03:07:56	21/07/2016 03:07	51.75632	-5.28721	bird 67	27.4741	308	87.67239772	0.284650642	2148.976782	236.7	3:00:00
21/07/2016	03:13:04	21/07/2016 03:13	51.75702	-5.286627	bird 67	354.9154	308	338.4676194	1.098920842	2219.916797	236.7	3:00:00
21/07/2016	03:18:12	21/07/2016 03:18	51.76005	-5.287063	bird 67	59.2669	308	87.25468939	0.283294446	2557.804175	236.8	3:00:00
21/07/2016	03:23:20	21/07/2016 03:23	51.76045	-5.285976	bird 67	48.6164	307	82.87329299	0.26994558	2593.265438	236.8	3:00:00
21/07/2016	03:28:27	21/07/2016 03:28	51.76094	-5.285072	bird 67	61.69463	309	98.56827228	0.318991172	2642.036541	235.2	3:00:00
21/07/2016	03:33:36	21/07/2016 03:33	51.76136	-5.283815	bird 67	107.6184	306	67.32648952	0.220021208	2683.5543	235.2	3:00:00
21/07/2016	22:14:55	21/07/2016 22:14	51.75243	-5.283498	bird 67	267.5098	306	136.0165392	0.444498494	1690.670971	159.3	22:00:00
21/07/2016	22:20:01	21/07/2016 22:20	51.75238	-5.285466	bird 67	266.9364	306	143.9861247	0.470542891	1697.895111	162.6	22:00:00
21/07/2016	22:25:07	21/07/2016 22:25	51.75231	-5.287548	bird 67	159.1248	306	296.5575958	0.96914247	1715.344633	160.6	22:00:00
21/07/2016	22:30:13	21/07/2016 22:30	51.74982	-5.286016	bird 67	228.6105	306	148.7761033	0.486196416	1422.877353	160.6	22:00:00
08/08/2016	02:47:51	08/08/2016 02:47	51.74533	-5.278467	bird 68	350.4639	293	612.6720978	2.091031051	934.0769197	291	2:00:00
08/08/2016	02:52:44	08/08/2016 02:52	51.75076	-5.279941	bird 68	337.7791	292	465.202329	1.593158661	1510.26934	291	2:00:00
08/08/2016	02:57:36	08/08/2016 02:57	51.75463	-5.282491	bird 68	342.0678	312	672.6734788	2.15600474	1932.938594	286.7	2:00:00
13/08/2016	00:44:55	13/08/2016 00:44	51.74866	-5.281525	bird 68	180.7874	3931	1252.934357	0.318731711	1269.740708	236.5	0:00:00
17/07/2016	02:56:24	17/07/2016 02:56	51.74398	-5.274615	bird 69	9.697661	291	440.2182675	1.512777552	911.4000482	242.4	2:00:00
17/07/2016	03:01:15	17/07/2016 03:01	51.74788	-5.273541	bird 69	16.32722	283	187.867684	0.663843406	1322.989066	242.4	3:00:00
17/07/2016	03:05:58	17/07/2016 03:05	51.7495	-5.272774	bird 69	348.998	283	228.9886899	0.809147314	1508.034347	235.1	3:00:00
17/07/2016	03:10:41	17/07/2016 03:10	51.75152	-5.273409	bird 69	5.513142	283	82.72312299	0.292307855	1697.643508	235.1	3:00:00
17/07/2016	03:15:24	17/07/2016 03:15	51.75226	-5.273293	bird 69	104.1045	285	96.1098587	0.337227574	1777.532087	236.3	3:00:00
17/07/2016	03:20:09	17/07/2016 03:20	51.75205	-5.271943	bird 69	356.1886	283	159.4606012	0.563465022	1790.083475	236.3	3:00:00
17/07/2016	03:24:52	17/07/2016 03:24	51.75348	-5.272097	bird 69	77.84887	283	94.87798407	0.335257894	1933.465499	236.3	3:00:00
17/07/2016	03:29:35	17/07/2016 03:29	51.75366	-5.270754	bird 69	348.5806	282	237.2461557	0.841298424	1986.875317	245.8	3:00:00
17/07/2016	03:34:17	17/07/2016 03:34	51.75575	-5.271435	bird 69	257.8376	283	161.5758447	0.57093938	2185.958075	245.8	3:00:00
17/07/2016	03:39:00	17/07/2016 03:39	51.75544	-5.273721	bird 69	309.1113	283	96.2022172	0.339937163	2104.758884	243.5	3:00:00
17/07/2016	03:43:43	17/07/2016 03:43	51.75599	-5.274796	bird 69	101.2061	283	89.61867687	0.31667377	2144.900774	243.5	3:00:00
17/07/2016	03:48:26	17/07/2016 03:48	51.75583	-5.273524	bird 69	115.9277	284	88.62960836	0.312076086	2150.183527	248.2	3:00:00
17/07/2016	03:53:10	17/07/2016 03:53	51.75548	-5.272371	bird 69	305.3966	284	151.4994312	0.533448701	2136.52229	248.2	3:00:00
17/07/2016	03:57:54	17/07/2016 03:57	51.75627	-5.274158	bird 69	120.0594	316	113.1681307	0.358126996	2185.826144	248.8	3:00:00
17/07/2016	04:03:10	17/07/2016 04:03	51.75576	-5.27274	bird 69	136.8972	309	96.33412604	0.311760926	2158.314013	248.8	4:00:00
17/07/2016	04:08:19	17/07/2016 04:08	51.75513	-5.271783	bird 69	147.168	313	81.92505613	0.261741393	2112.978533	239.7	4:00:00
17/07/2016	04:13:32	17/07/2016 04:13	51.75451	-5.271143	bird 69	172.0401	354	102.2434335	0.288823258	2064.026298	239.7	4:00:00
17/07/2016	04:19:26	17/07/2016 04:19	51.7536	-5.270937	bird 69	188.8921	284	82.22029194	0.28950807	1975.785905	244.6	4:00:00
17/07/2016	04:24:10	17/07/2016 04:24	51.75287	-5.271122	bird 69	192.7374	285	90.10419586	0.316155073	1896.209594	244.6	4:00:00
17/07/2016	04:28:55	17/07/2016 04:28	51.75208	-5.271409	bird 69	204.3388	283	85.47681672	0.302038222	1807.897231	236.8	4:00:00
17/07/2016	04:33:38	17/07/2016 04:33	51.75138	-5.271919	bird 69	215.2695	283	83.56691131	0.295289439	1722.509865	236.8	4:00:00
17/07/2016	04:38:21	17/07/2016 04:38	51.75077	-5.272625	bird 69	216.0542	284	85.11594823	0.299704043	1640.808703	239.2	4:00:00
17/07/2016	19:46:12	17/07/2016 19:46	51.75376	-5.349499	bird 69	337.4611	285	117.019299	0.410594031	4986.078832	213.1	19:00:00
17/07/2016	21:14:06	17/07/2016 21:14	51.77522	-5.319248	bird 69	202.9832	291	187.308706	0.643672529	4933.837463	178.3	21:00:00
17/07/2016	21:24:01	17/07/2016 21:24	51.7728	-5.302829	bird 69	192.7896	285	295.5228731	1.036922362	4201.304751	184.7	21:00:00
17/07/2016	21:28:46	17/07/2016 21:28	51.77021	-5.303778	bird 69	199.7225	284	312.0755724	1.098857649	3955.641607	185.4	21:00:00
17/07/2016	21:33:30	17/07/2016 21:33	51.76757	-5.305305	bird 69	202.6788	285	324.6268659	1.139041635	3728.984624	185.4	21:00:00
17/07/2016	21:38:15	17/07/2016 21:38	51.76488	-5.307126	bird 69	207.3689	285	364.5946614	1.279279514	3520.367099	182.7	21:00:00
17/07/2016	21:43:00	17/07/2016 21:43	51.76197	-5.309554	bird 69	211.9362	285	373.885198	1.311877888	3333.437951	182.7	21:00:00
17/07/2016	21:47:45	17/07/2016 21:47	51.75912	-5.312423	bird 69	210.7146	284	421.0193981	1.482462669	3202.179472	177.7	21:00:00
17/07/2016	21:52:29	17/07/2016 21:52	51.75587	-5.315546	bird 69	209.7938	285	468.1615964	1.642672268	3093.382454	177.7	21:00:00
17/07/2016	21:57:14	17/07/2016 21:57	51.75222	-5.318919	bird 69	204.236	327	578.791889	1.770005777	3028.970216	184.8	21:00:00
17/07/2016	22:12:50	17/07/2016 22:12	51.74034	-5.275864	bird 69	288.6906	306	260.3964064	0.850968648	553.6135889	190.7	22:00:00
17/07/2016	22:17:56	17/07/2016 22:17	51.74109	-5.279435	bird 69	204.1045	307	63.3902262	0.206482821	466.7669482	186.9	22:00:00
17/07/2016	22:23:03	17/07/2016 22:23	51.74057	-5.27981	bird 69	192.7862	309	21.68577693	0.070180508	403.443485	186.9	22:00:00
17/07/2016	22:28:12	17/07/2016 22:28	51.74038	-5.27988	bird 69	126.8102	314	20.94112081	0.066691468	382.1830324	185.3	22:00:00
17/07/2016	22:33:26	17/07/2016 22:33	51.74027	-5.279634	bird 69	213.6535	311	62.70735177	0.201631356	378.5653797	185.3	22:00:00
17/07/2016	22:38:37	17/07/2016 22:38	51.7398	-5.280135	bird 69	8.184372	305	97.80865204	0.320684105	316.3575634	177.4	22:00:00
17/07/2016	22:43:42	17/07/2016 22:43	51.74067	-5.279932	bird 69	136.8054	305	56.53628129	0.185364857	410.4280116	177.4	22:00:00
17/07/2016	22:48:47	17/07/2016 22:48	51.7403	-5.279371	bird 69	104.7358	308	21.92351887	0.071180256	390.1358565	177.5	22:00:00
17/07/2016	22:53:55	17/07/2016 22:53	51.74025	-5.279064	bird 69	63.55855	308	72.01086349	0.233801505	396.2890499	177.5	22:00:00
17/07/2016	22:59:03	17/07/2016 22:59	51.74054	-5.278132	bird 69	151.5501	300	22.67699162	0.075589972	459.5018031	177.9	22:00:00
17/07/2016	23:04:03	17/07/2016 23:04	51.74036	-5.277978	bird 69	316.3013	283	540.557524	1.910097258	450.4346939	177.9	23:00:00
17/07/2016	23:08:46	17/07/2016 23:08	51.74387	-5.283389	bird 69	232.9008	285	39.27163414	0.137795207	741.1552635	182.7	23:00:00
17/07/2016	23:13:31	17/07/2016 23:13	51.74366	-5.283846	bird 69	145.8473	290	507.2330517	1.749079489	722.3293635	182.7	23:00:00
17/07/2016	23:18:21	17/07/2016 23:18	51.73989	-5.279717	bird 69	56.93065	285	186.183785	0.653276438	338.7311189	178.9	23:00:00
17/07/2016	23:23:06	17/07/2016 23:23	51.7408	-5.277455	bird 69	101.3459	285	190.5690971	0.668663499	511.0873593	178.9	23:00:00
17/07/2016	23:27:51	17/07/2016 23:27	51.74046	-5.274751	bird 69	112.8598	287	33.95669537	0.118316012	623.073526	184.6	23:00:00
17/07/2016	23:32:38	17/07/2016 23:32	51.74034	-5.274299	bird 69	157.6757	287	33.7251827	0.117509347	641.5725749	184.6	23:00:00
17/07/2016	23:37:25	17/07/2016 23:37	51.74006	-5.274112	bird 69	180.4166	291	56.74533967	0.195001167	636.6249678	187.9	23:00:00
17/07/2016	23:42:16	17/07/2016 23:42	51.73955	-5.274118	bird 69	199.4964	317	109.7597756	0.346245349	610.3989152	187.9	23:00:00
17/07/2016	23:47:33	17/07/2016 23:47	51.73862	-5.274648	bird 69	114.8923	285	405.2606647	1.421967245	539.6558911	193.4	23:00:00
17/07/2016	23:52:18	17/07/2016 23:52	51.73709	-5.269324	bird 69	218.1341	283	466.1537113	1.647186259	884.4291487	193.4	23:00:00
18/07/2016	00:02:02	18/07/2016 00:02	51.74069	-5.279795	bird 69	226.8415	319	11.5767578	0.036290777	416.0997803	193.1	0:00:00
18/07/2016	00:07:21	18/07/2016 00:07	51.74062	-5.279919	bird 69	171.491	323	33.74720149	0.1044805	405.6192039	199.6	0:00:00
18/07/2016	00:12:44	18/07/2016 00:12	51.74032	-5.279847	bird 69	117.8124	322	164.1207069	0.509691636	377.0696152	199.6	0:00:00
18/07/2016	00:18:06	18/07/2016 00:18	51.73963	-5.277747	bird 69	308.8724	321	500.2140525	1.558299229	403.3941272	195.9	0:00:00
18/07/2016	00:23:27	18/07/2016 00:23	51.74245	-5.283387	bird 69	130.1074	322	338.705181	1.051879444	584.5379103	195.9	0:00:00
18/07/2016	00:28:49	18/07/2016 00:28	51.74049	-5.279635	bird 69	37.70411	323	264.8521357	0.819975652	400.4091784	202.5	0:00:00
18/07/2016	00:44:55	18/07/2016 00:44	51.7328	-5.283438	bird 69	192.1717	321	69.40332847	0.216209746	502.2806339	204.3	0:00:00
18/07/2016	00:50:16	18/07/2016 00:50	51.73219	-5.283648	bird 69	271.3408	325	52.44889591	0.161381218	571.5974511	204.4	0:00:00
18/07/2016	00:55:41	18/07/2016 00:55	51.7322	-5.284407	bird 69	169.6797	327	63.36609173	0.193780097	582.1328168	188	0:00:00
18/07/2016	01:01:08	18/07/2016 01:01	51.73164	-5.28424	bird 69	171.8845	310	80.92560087	0.261050325	639.7192439	188	1:00:00
18/07/2016	01:06:18	18/07/2016 01:06	51.73092	-5.284074	bird 69	218.7293	309	22.620341	0.073204987	715.7935083	184.2	1:00:00
18/07/2016	01:26:50	18/07/2016 01:26	51.74339	-5.281257	bird 69	181.828	306	252.6950212	0.825800723	685.8358023	180.5	1:00:00
18/07/2016	02:50:21	18/07/2016 02:50	51.74294	-5.277596	bird 69	20.26551	286	463.7755424	1.621592805	706.8263039	171.2	2:00:00
18/07/2016	02:55:07	18/07/2016 02:55	51.74685	-5.275269	bird 69	42.12333	291	127.7252215	0.438918287	1168.535625	163	2:00:00
18/07/2016	02:59:58	18/07/2016 02:59	51.7477	-5.274026	bird 69	24.01909	297	282.8641728	0.952404622	1290.284452	163	2:00:00
18/07/2016	03:09:49	18/07/2016 03:09	51.75726	-5.272996	bird 69	37.8873	293	168.1425539	0.573865372	2313.057319	155.5	3:00:00
18/07/2016	03:14:42	18/07/2016 03:14	51.75845	-5.271495	bird 69	51.76054	293	111.408005	0.380232099	2469.366234	155.5	3:00:00
18/07/2016	03:19:35	18/07/2016 03:19	51.75907	-5.270228	bird 69	34.62967	295	154.2776736	0.522975165	2561.900775	156.9	3:00:00
18/07/2016	03:24:30	18/07/2016 03:24	51.76021	-5.268956	bird 69	40.8575	294	150.1531889	0.510725132	2710.380094	156.9	3:00:00
18/07/2016	03:29:24	18/07/2016 03:29	51.76123	-5.267532	bird 69	35.53222	295	134.4772506	0.455855087	2850.628355	148.5	3:00:00
[truncated: 501 more rows]
